# Supplementary material for: Multicomponent intervention to reduce daily sedentary time: a randomised controlled trial
Source: PubMed Central journal article supplement — BMJ Open. 2013 Oct 18;3(10):e003261. doi: 10.1136/bmjopen-2013-003261 (PMC3808782; doi:10.1136/bmjopen-2013-003261), 2013-10-18
Supplement: bmjopen-2013-003261.draft_revisions.pdf [file bmjopen-2013-003261.draft_revisions.pdf]

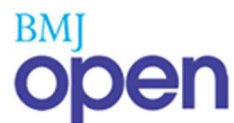

**Multicomponent Intervention to Reduce Daily Sedentary Time: A Randomized Controlled Trial**

|                                 |                                                                                                                                                                                                                                                                                                                                  |
|---------------------------------|----------------------------------------------------------------------------------------------------------------------------------------------------------------------------------------------------------------------------------------------------------------------------------------------------------------------------------|
| Journal:                        | <i>BMJ Open</i>                                                                                                                                                                                                                                                                                                                  |
| Manuscript ID:                  | bmjopen-2013-003261                                                                                                                                                                                                                                                                                                              |
| Article Type:                   | Research                                                                                                                                                                                                                                                                                                                         |
| Date Submitted by the Author:   | 20-May-2013                                                                                                                                                                                                                                                                                                                      |
| Complete List of Authors:       | Carr, Lucas; University of Iowa, Health and Human Physiology<br>Karvinen, Kristina; Nipissing University, School of Physical and Health Education<br>Peavler, Mallory; East Carolina University, Kinesiology<br>Smith, Rebecca; East Carolina University, Kinesiology<br>Cangelosi, Kayla; East Carolina University, Kinesiology |
| <b>Primary Subject Heading</b>: | Public health                                                                                                                                                                                                                                                                                                                    |
| Secondary Subject Heading:      | Occupational and environmental medicine                                                                                                                                                                                                                                                                                          |
| Keywords:                       | sedentary, worksite, technology                                                                                                                                                                                                                                                                                                  |
|                                 |                                                                                                                                                                                                                                                                                                                                  |

SCHOLARONE™  
Manuscripts

1  
2 1 **Multicomponent Intervention to Reduce Daily Sedentary Time: A Randomized Controlled Trial**  
3  
4 2

5  
6 3 **Corresponding Author:**  
7

8 4 Lucas J. Carr, Ph.D.; University of Iowa; Department of Health and Human Physiology; Field House  
9  
10 5 E118; Iowa City, IA 52242; Phone: (319)353-5432; Email: Lucas-Carr@uiowa.edu  
11  
12 6

13  
14  
15 7 **Co-Authors:**  
16

17 8 Kristina Karvinen, Ph.D.; School of Physical and Health Education; Nipissing University; North Bay,  
18  
19 9 Ontario, Canada  
20

21 10 Mallory Peavler, M.S., Department of Kinesiology; East Carolina University; Greenville, NC, USA  
22

23 11 Rebecca Smith, M.S.; Department of Kinesiology; East Carolina University; Greenville, NC, USA  
24

25 12 Kayla Cangelosi, M.S.; Department of Kinesiology; East Carolina University; Greenville, NC, USA  
26  
27 13

28  
29  
30 14 **Word Count:**  
31

32 15 **Keywords:** sedentary, multicomponent, cardiometabolic  
33  
34 16  
35  
36  
37 17  
38  
39 18  
40  
41 19  
42  
43 20  
44  
45 21  
46  
47 22  
48  
49  
50 23  
51  
52 24  
53  
54 25  
55  
56 26  
57  
58 27  
59  
60

## ABSTRACT

**Background.** Sedentary behavior has been estimated to be responsible for 9% of premature deaths worldwide. The purpose of this study was to test the efficacy of a multipronged technology intervention for reducing daily sedentary time and improving cardiometabolic disease risk amongst sedentary university employees using a randomized controlled trial design. **Methods.** Forty adults working in sedentary jobs were randomized to either: 1) an intervention group (N=23; 47.6±9.9 yrs; 94.1% female; 33.2±4.5 kg/m<sup>2</sup>); 2) or wait list control group (N=17; 42.6±8.9 yrs; 86.9% female; 31.7±4.9 kg/m<sup>2</sup>). The intervention group received a theory-based, internet-delivered program, a portable pedal machine at work and a pedometer for 12 weeks. Primary (sedentary and physical activity behavior) and secondary (heart rate, blood pressure, height, weight, waist circumference, percent body fat, cardiorespiratory fitness, fasting lipids) outcomes were measured at baseline and post-intervention. Exploratory outcomes including intervention compliance and process evaluation measures were also assessed post-intervention. **Results.** The intervention group reduced percent of daily time spent sedentary (P=0.03) and increased percent time in moderate intensity physical activity compared to the control group. A significant interaction effect was observed for waist circumference (P=0.03) with no changes in any other cardiometabolic risk factors observed. Intervention participants logged onto the website 71.3% of all intervention days, used the pedal machine 37.7% of all working intervention days, and pedaled an average of 31.1 minutes/day. **Discussion.** These findings suggest the intervention was engaging and resulted in reductions in daily sedentary time amongst full-time sedentary employees. These findings hold public health significance due to the growing number of sedentary jobs and the potential of these technologies in large-scale worksite programs. ClinicalTrials.gov #NCT01371084

## Article focus

- The primary aim of this study was to test the effectiveness of a multicomponent intervention for reducing daily sedentary time and improving cardiometabolic risk factors amongst a sample of sedentary, overweight, full-time working adults compared to a waitlist control.

- 1  
2 55 • We hypothesized that the intervention group would significantly reduce daily sedentary time  
3  
4 56 and select cardiometabolic disease risk factors compared to the wait-list control group after 12  
5  
6 57 weeks.  
7  
8  
9 58 • As an exploratory aim, we conducted a process evaluation to explore intervention compliance  
10  
11 59 and identify helpful components of the intervention.  
12

### 13 60 **Key messages**

- 14  
15 61 • This multicomponent intervention resulted in significant reductions in time spent sedentary  
16  
17 62 and waist circumference when comparing the intervention group to the wait list control  
18  
19  
20 63 group.  
21  
22 64 • The present study builds upon past studies as our study was among the first to demonstrate  
23  
24 65 significant reductions in objectively measured sedentary time when compared to a control  
25  
26 66 group.  
27  
28  
29 67 • The findings of this study are important given the paucity of research in this area and  
30  
31 68 growing evidence demonstrating the importance of limiting daily sedentary time for  
32  
33 69 reducing risk of chronic diseases.  
34

### 35 70 **Strengths**

- 36  
37  
38 71 • Primary strengths of this study include: 1) among the first RCT's to target sedentary time as a  
39  
40 72 primary outcome; 2) among the first RCT's to use an objective measure of sedentary time; 3)  
41  
42 73 conducted a 12 week trial which extends previous sedentary interventions that have typically  
43  
44 74 been of brief durations; 4) measured Cardiometabolic risk factors; and 5) conducted a process  
45  
46 75 evaluation to identify features of the intervention that worked particularly well.  
47

### 48 76 **Limitations**

- 49  
50  
51 77 • Primary limitations of this study include: 1) small sample size (N=40) comprised primarily of  
52  
53 78 middle-aged females working at a single institution which limits generalizability; and 2)  
54  
55 79 differential drop out, although follow-up analyses indicate no differences between those that  
56  
57  
58  
59  
60

1  
2 80 dropped and those that completed amongst the control group for age (P=0.40), BMI (P=0.52),  
3  
4 81 or daily sedentary time (P=0.22).  
5  
6 82  
7  
8 83  
9

## 10 84 INTRODUCTION

11  
12  
13 85 Prolonged sedentary behavior is an independent risk factor for multiple chronic health  
14  
15 86 outcomes including cardiovascular disease,[1 2] type 2 diabetes,[3] hypertension,[4] metabolic  
16  
17 87 syndrome[5] and obesity.[6] Conversely, evidence suggests breaking up prolonged periods of  
18  
19 88 sedentary behavior may result in cardiometabolic health benefits, independent of more intense  
20  
21 89 physical activity, including reductions in waist circumference,[7 8] body mass index (BMI), fasting  
22  
23 90 glucose and triglyceride levels.[8] However, to date, few interventions have been conducted to  
24  
25 91 reduce sedentary behaviors of adults.[9]  
26  
27

28 92 Adults working in full-time sedentary jobs are at particular risk for being sedentary as they  
29  
30 93 often spend more than 75% of work time sitting[10 11]. Currently, more than 27% of the U.S. labor  
31  
32 94 force works in low-activity occupations.[12] The observed decline in occupational energy expenditure  
33  
34 95 (~100 kcals/day) over the past 50 years has been identified as a key contributor to the observed  
35  
36 96 increase in mean body mass amongst U.S. adults over the same time period.[13] Traditional  
37  
38 97 behaviorally focused worksite interventions have focused primarily on increasing physical activity and  
39  
40 98 have resulted in modest effect sizes (Cohen's  $d = 0.21-0.22$ ).[14 15] In a shift away from behaviorally  
41  
42 99 focused approaches, studies grounded in social ecological theory[16] have begun testing the effect of  
43  
44 100 modifying the work environment to reduce occupational sedentary time. However, to date, only a  
45  
46 101 handful of worksite interventions have been conducted to reduce sedentary time, most of which have  
47  
48 102 not demonstrated effectiveness.[17] Of the sedentary worksite interventions that have been  
49  
50 103 conducted, most have been limited by self-report methods of sedentary time[17] and/or short  
51  
52 104 intervention durations[18 19]. Overall, there is a need for interventions aimed specifically at reducing  
53  
54 105 sedentary time amongst adults. The worksite is an ideal setting for delivering such interventions.  
55  
56  
57  
58  
59  
60

1  
2 106 In a study testing the feasibility of modifying the work environment as a means of reducing  
3  
4 107 occupational sedentary time, our team provided portable pedal machines (MagneTrainer, 3D  
5  
6 108 Innovations) to 18 sedentary desk workers for four weeks [10]. Participants rated the pedal machines  
7  
8 109 as feasible for use while completing their work. Further, despite a lack of any accompanying  
9  
10 110 behavioral intervention, participants used the pedal machines on 61% of all work days for an average  
11  
12 111 of 23.4 minutes per day. Although these results are promising, it is possible the addition of a  
13  
14 112 motivational behavioral intervention could result in increased pedaling compliance and reduced  
15  
16 113 sedentary time.  
17

18  
19 114 The primary aim of this study was to test the effectiveness of a multicomponent intervention  
20  
21 115 for reducing daily sedentary time and improving cardiometabolic risk factors amongst a sample of  
22  
23 116 sedentary, overweight, full-time working adults compared to a waitlist control. We hypothesized that  
24  
25 117 the intervention group would significantly reduce daily sedentary time and select cardiometabolic  
26  
27 118 disease risk factors compared to the wait-list control group after 12 weeks. As an exploratory aim, we  
28  
29 119 conducted a process evaluation to explore intervention compliance and identify helpful components  
30  
31 120 of the intervention.  
32  
33  
34  
35 121

## 36 122 **METHODS**

### 37 123 **Subjects and Design**

38  
39 124  
40  
41 125 We utilized a 12 week randomized controlled trial design comparing a treatment group to a no  
42  
43 126 treatment waitlist control group. We recruited apparently healthy but sedentary (self-reporting less  
44  
45 127 than 60 minutes of moderate-to-vigorous intensity physical activity per week), overweight (body mass  
46  
47 128 index (BMI)  $\geq 25.0$  kg/m<sup>2</sup>) adults working in full-time (minimum of 35.0+ hours/week) sedentary/desk-  
48  
49 129 dependent occupations (reporting minimum of 75% of working time spent sitting). Participants of all  
50  
51 130 races and ethnic backgrounds working at a large southern university were passively recruited through  
52  
53 131 email advertisements placed on an electronic mailing list serve. Research staff members screened  
54  
55 132 participants for eligibility by telephone. Exclusionary criteria included: 1) limitations with or  
56  
57  
58  
59  
60

1  
2 133 contraindications to ambulatory exercise; 2) acute illness or injury; 3) cognitive impairment, psychosis,  
3  
4 134 or other diagnosed psychological illness (with the exception of depression and anxiety); 4) currently  
5  
6 135 using psychotropic drugs; or 5) diagnosis of a chronic condition such as heart failure or cancer.  
7  
8  
9 136 Participants were not compensated for participation in the study. Experimental protocols were  
10  
11 137 approved by the University and Medical Center Institutional Review Board and voluntary informed  
12  
13 138 consent was obtained from each participant.

14  
15 139 A total of 192 people responded to our advertisements of which 143 were excluded from  
16  
17 140 participation due to: not meeting eligibility criteria (N=120); declined to participate (N=19); or other  
18  
19 141 reasons (N=4). A 1:1 random allocation sequence was generated by the principal investigator using  
20  
21 142 the an online random sequence generator.[20] Participants were assigned to one of two groups by a  
22  
23 143 research staff member not involved in data collection based on the order in which they enrolled into  
24  
25  
26 144 the study. A total of 49 participants deemed interested and eligible for participation were randomized  
27  
28 145 to one of two groups: 1) intervention (N=25); 2) wait-list control (N=24). Of the 49 enrolled, 40  
29  
30 146 participants completed all baseline and post-intervention assessments. Nine participants were lost to  
31  
32 147 follow-up (see Figure 1). Final analyses were completed on 40 participants with 23 intervention  
33  
34 148 participants and 17 control participants (see Table 1). More than half of all participants were college  
35  
36 149 educated, reported an annual income greater than \$40,000 and reported being non-Hispanic/White.  
37  
38  
39 150 Participants were enrolled and completed all testing sessions between June 2011 and June 2012.  
40

41 151  
42  
43 152 [Figure 1 here]  
44  
45 153  
46  
47 154  
48

## 49 155 **Group Descriptions**

### 50 156 51 52 157 *Wait List Control Group* 53 54 55 56 57 58 59 60

1  
2 158 Participants randomized to the wait list control group were asked to maintain their current  
3  
4 159 behaviors for 12 weeks at which time they were given the option to receive the intervention treatment  
5  
6 160 materials.  
7

8 161  
9 162  
10  
11 162 *Intervention Group*

12  
13 163 The intervention comprised of three primary components: 1) access to a portable pedal  
14  
15 164 machine (MagneTrainer, 3D Innovations, Greeley, CO) at their worksite (Figure 2); 2) access to an  
16  
17 165 internet-delivered motivational intervention (Walker Tracker, Portland, OR); and 3) a pedometer  
18  
19 166 (Omron HJ-150). The pedal machine is a portable (18" height, 20" length) device that has been  
20  
21 167 demonstrated as acceptable for use during sedentary office work [10] (Figure 2). The pedal machine  
22  
23  
24 168 is accompanied by a PC interface and software package that allows for objective monitoring of  
25  
26 169 individual pedal activity. This software also provides the user with real-time feedback via a display  
27  
28 170 monitor on pedal time, distance, speed and caloric expenditure. The research team delivered the  
29  
30 171 pedal machine to each participant's worksite, downloaded the pedal tracking software to the  
31  
32 172 participant's work computer, and worked with the participant to identify the most feasible set up.  
33  
34  
35 173 Intervention participants were asked to keep the pedal machine connected to their PC during all  
36  
37 174 working hours.

38  
39 175 Intervention participants were also provided access to a motivational website that was  
40  
41 176 individually customized to the local culture of the worksite of which participants were recruited (Figure  
42  
43 177 4). Examples of customization included posting local images and messages specific to the local  
44  
45 178 institution. The content of the intervention targeted constructs of the Social Cognitive Theory[21]  
46  
47 179 including self-monitoring, social support, self-efficacy, and perceived environment. For example,  
48  
49  
50 180 participants were prompted via daily email messages to self-monitor their daily pedal time and daily  
51  
52 181 steps (via pedometer) on the website. The activity participants logged on the website was used to fuel  
53  
54 182 a virtual competition (aimed at building social support) in which small groups of intervention  
55  
56 183 participants (4-5 per group) collectively traveled across America (Figure 2). Participants were also  
57  
58 184 emailed three theory-based motivational messages each week targeting goal setting, self-efficacy,  
59  
60



1  
2 185 and perceived environment. Specific goals were not set for intervention participants, rather  
3  
4 186 participants received advice on how to set goals and suggestions for daily pedaling time (e.g. “Try  
5  
6 187 fitting in 10 minutes of pedaling during your lunch today.”) Finally, using a forum similar to Facebook,  
7  
8 188 participants were able to post profile photos and status updates on a newsfeed and send messages  
9  
10 189 to members of their small groups further fostering social support.  
11  
12  
13 190

14  
15 191 [Figure 2 here]  
16  
17 192

## 19 193 **Measures**

20  
21 194 All measures were collected at baseline and post-intervention (12 weeks) in a controlled  
22  
23 195 laboratory setting by two staff members blinded to participant’s group assignment. The primary  
24  
25 196 outcome was daily sedentary time as measured objectively by the StepWatch (Orthocare Innovations,  
26  
27 197 Mountlake Terrace, Wash, USA). The StepWatch is an ankle monitor that has been demonstrated as  
28  
29 198 a reliable[22] and accurate measure of light intensity walking[23] and pedaling.[24] Participants were  
30  
31 199 asked to wear the monitor during all wakeful hours for seven consecutive days. Days in which  
32  
33 200 participants wore the monitors for less than 10 hours were excluded from final analysis. Intervention  
34  
35 201 participants wore the StepWatch monitor an average of 5.7 of 7.0 (81.0%) days for 14.5 hours/day  
36  
37 202 while control participants wore the monitor an average of 5.5 days (78.6%) for 13.8 hours/day.  
38  
39

40  
41 203 Blood pressure was measured with a stethoscope and sphygmomanometer using standard  
42  
43 204 techniques. Heart rate was monitored with a Polar™ heart rate monitor and chest strap. Body mass  
44  
45 205 was measured to the nearest 0.1 kg and height to the nearest 0.5 cm using a professional grade  
46  
47 206 digital medical scale and height rod (Seca 769, Hanover,MD). Waist circumference was measured in  
48  
49 207 duplicate with a standard Gulick measuring tape according to standard procedures.[25] Fasting blood  
50  
51 208 lipids (total cholesterol, LDL cholesterol, HDL cholesterol, and triglycerides) were assessed via finger  
52  
53 209 stick and using a point-of-care analyzer (Cholestech LDX analyzer) that has previously been  
54  
55 210 demonstrated as an accurate and precise measure of total cholesterol (1.6% and 3.0% respectively),  
56  
57 211 HDL-cholesterol (-2.74% and 1.05% respectively) and triglycerides (2.11% and 2.65%  
58  
59  
60

1  
2 212 respectively).[26] Estimated aerobic fitness was assessed via a single-stage submaximal treadmill  
3  
4 213 walking test which had been previously demonstrated as a valid estimate of total aerobic fitness  
5  
6 214 amongst middle-aged adults.[27]  
7

8  
9 215 Compliance with the pedal machine (i.e., minutes pedaled/day, total days pedaled) was  
10  
11 216 assessed objectively via the activity tracking software. Pedal compliance data was downloaded  
12  
13 217 directly from each individual's work computer at the end of 12 weeks. Website use compliance (e.g.,  
14  
15 218 number of website logins, number of steps logged on the website) was assessed objectively at the  
16  
17 219 end of 12 weeks via a backend tracking database made available by the website administrators. In  
18  
19 220 order to assess which components of the intervention participants 'perceived' as helpful for reducing  
20  
21 221 their sedentary time, a process evaluation survey was conducted at 12 weeks amongst intervention  
22  
23 222 completers. Participants rated each intervention component using a five point Likert scale.  
24  
25  
26 223  
27

## 28 224 **Design/Statistical Analysis**

29  
30 225 Baseline descriptive and independent variables were analyzed by one-way analysis of  
31  
32 226 variance (ANOVA) (see Table 1). The sample size was calculated to detect, with 80% power, at  
33  
34 227  $\alpha=0.05$ , a 30 minute/day difference in daily sedentary time. The 30 minute/day difference was  
35  
36 228 identified as a reasonable estimate based on our previous study in which participants used the pedal  
37  
38 229 machines an average of 23 minutes/day without a motivational intervention.[10] All outcome  
39  
40 230 measures were evaluated before and after the 12-week experimental period within and between  
41  
42 231 groups by two-way (group  $\times$  time) repeated measures ANOVA. When indicated by a significant F  
43  
44 232 value, post hoc procedures were performed (Tukey). Cohen's *d* effect size[28] was computed to  
45  
46 233 assess the magnitude of change for primary outcomes. Statistical significance was set *a priori* at  
47  
48 234  $P<0.05$ .  
49  
50  
51  
52 235  
53

## 54 236 **RESULTS**

55  
56 237 Baseline characteristics of both groups are presented in Table 1. There were no significant  
57  
58 238 differences found between the Control and Intervention groups for age ( $P=0.10$ ), gender ( $P=0.46$ ),  
59  
60

percentage Non-Hispanic White (P=0.40), college education (%) (P=0.24), Income > \$40,000 (%) (P=0.94) or BMI (P=0.40) (Table 1). Likewise, there were no significant differences found for daily monitor wear time (P=0.35), percent time spent sedentary (P=0.42) or in any physical activity behaviors between groups at baseline (Table 2).

**Table 1.** Baseline characteristics between groups Mean  $\pm$  S.D. (N=40)

|                        | Control Group<br>N=17 | Intervention Group<br>N=23 | P-value |
|------------------------|-----------------------|----------------------------|---------|
| Age (years)            | 47.6 $\pm$ 9.9        | 42.6 $\pm$ 8.9             | 0.10    |
| Female %               | 94.1%                 | 86.9%                      | 0.46    |
| Height (in)            | 65.2 $\pm$ 3.2        | 65.4 $\pm$ 3.4             | 0.89    |
| Weight (lbs)           | 201.3 $\pm$ 30.2      | 194.1 $\pm$ 34.9           | 0.50    |
| Body Mass Index (BMI)  | 33.2 $\pm$ 4.5        | 31.7 $\pm$ 4.9             | 0.36    |
| Non-Hispanic White (%) | 76.5%                 | 63.6%                      | 0.40    |
| College Graduate (%)   | 71.0%                 | 86.0%                      | 0.24    |
| Income >\$40,000 (%)   | 62.5%                 | 63.6%                      | 0.94    |

Significant group x time interaction effects were observed for absolute number of daily sedentary minutes (F(2,38)=8.25; P<0.01), percentage of daily time spent sedentary ((F(2,38)=4.71; P=0.04) (Table 2) and percentage of daily time spent in moderate intensity physical activity (F(2,38)=4.37; P=0.04) with the intervention group improving in each variable. No significant main effects or interaction effects were observed for absolute minutes of moderate intensity activity or for absolute or relative time spent in light and/or vigorous intensity physical activity (Table 2).

**Table 2.** Absolute and relative time spent in sedentary and physical activity behaviors at baseline and post-intervention (N=40).

|                   | Control (N=17) |             | Intervention (N=23) |              | P     | d    |
|-------------------|----------------|-------------|---------------------|--------------|-------|------|
|                   | Baseline       | 12 Weeks    | Baseline            | 12 Weeks     |       |      |
| Minutes Sedentary | 544.2±76.9     | 599.7±106.6 | 584.9±136.1         | 526.1±77.3*† | <0.01 | 0.37 |
| % Time Sedentary  | 65.7±7.5       | 67.5±8.0    | 67.6±7.2            | 63.9±7.9†    | 0.03  | 0.22 |
| Minutes Light     | 265.7±84.0     | 262.2±70.8  | 263.9±69.5          | 270.3±69.5   | 0.67  | 0.05 |
| % Time Light      | 31.9±8.1       | 30.3±8.4    | 30.6±8.2            | 32.7±7.6     | 0.14  | 0.15 |
| Minutes Moderate  | 18.6±25.2      | 17.4±23.7   | 14.5±18.5           | 23.3±28.0    | 0.11  | 0.11 |
| % Time Moderate   | 2.3±3.2        | 2.0±2.9     | 1.5±1.5             | 2.8±3.4†     | 0.04  | 0.13 |
| Minutes Vigorous  | 1.2±2.6        | 1.5±2.7     | 2.7±6.4             | 4.9±10.9     | 0.51  | 0.21 |
| % Time Vigorous   | 0.1±0.3        | 0.2±0.3     | 0.3±0.6             | 0.6±1.3      | 0.38  | 0.22 |

Mean ± S.D.

\*Significant difference between groups at same time point ( $p < 0.05$ )

†Significant difference within groups compared to baseline ( $p < 0.05$ )

There were no significant differences between groups at baseline for any cardiometabolic risk factors (Table 3). A significant group x time interaction was observed for waist circumference ( $F(2,38)=5.02$ ;  $P=0.03$ ) (Table 3). No significant main effects or interaction effects were observed for any other cardiometabolic risk factors.

**Table 3.** Cardiometabolic risk factors at baseline and post-intervention (N=40).

|                          | Control (N=17) |            | Intervention (N=23) |            | P Value |
|--------------------------|----------------|------------|---------------------|------------|---------|
|                          | Baseline       | 12 Weeks   | Baseline            | 12 Weeks   |         |
| Weight                   | 201.4+30.2     | 202.4+30.5 | 194.2+34.9          | 194.4+34.5 | 0.63    |
| BMI                      | 33.2+4.5       | 33.4+4.6   | 31.8+5.0            | 31.9+5.0   | 0.76    |
| Systolic BP              | 117.1+13.0     | 117.5+12.8 | 120.0+13.8          | 115.7+10.8 | 0.19    |
| Diastolic BP             | 72.8+10.3      | 73.2+10.6  | 78.2+10.3           | 75.4+7.4   | 0.34    |
| Waist Circumference (cm) | 92.9+11.1      | 93.9+10.8  | 92.6+11.2           | 91.6+11.3  | 0.03    |
| Estimated V02            | 29.6+2.5       | 30.0+2.6   | 30.8+5.1            | 31.1+4.6   | 0.86    |
| Total Cholesterol        | 184.4+25.9     | 185.0+18.9 | 191.4+26.3          | 189.7+27.0 | 0.68    |
| Triglycerides            | 130.6+65.4     | 131.0+59.9 | 98.4+45.2           | 118.4+57.3 | 0.38    |
| HDL                      | 47.6+18.4      | 46.7+18.9  | 45.7+17.6           | 43.7+16.4  | 0.76    |
| LDL                      | 111.2+32.1     | 120.2+25.3 | 119.4+23.2          | 116.7+29.4 | 0.28    |
| TC/HDL Ratio             | 3.8+1.7        | 4.5+1.9    | 4.7+2.1             | 4.7+2.1    | 0.57    |

Mean  $\pm$  S.D.

\*Significant difference between groups at the same time point ( $p < 0.05$ )

† Significant difference within groups compared to baseline ( $p < 0.05$ )

1  
2 285 A total of 23 participants completed the intervention and provided compliance data (see Table  
3  
4 286 4). Intervention participants logged on to the website an average of 71.3% (59.8 days) of all days they  
5  
6 287 had access to the website (including weekends) (Table 4). Intervention participants also logged an  
7  
8  
9 288 average of  $7945 \pm 4634$  steps per day on the website over the 12 weeks. Participants pedaled an  
10  
11 289 average of 37.7% (22.6 days) of all days they had access to the pedal machine (excluding  
12  
13 290 weekends). Participants pedaled an average of  $31.1 \pm 31.6$  minutes per day on the days they used the  
14  
15 291 pedal machines and for an average of  $16.1 \pm 17.2$  minutes per pedaling bout  
16  
17 292  
18  
19  
20  
21  
22

**Table 4.** Intervention compliance measures amongst Intervention completers (N=23).

|                                                    | Mean/% | S.D. |
|----------------------------------------------------|--------|------|
| Web Compliance % (Days Logged in/Days with Access) | 71.3   |      |
| Average Steps Logged Per Day                       | 7945   | 4634 |
| Average Days Pedaled Over 12 Weeks                 | 22.6   | 17.6 |
| Pedal Compliance % (Days Pedaled/Days with Access) | 37.7   |      |
| Average Pedal Bouts/Day                            | 1.9    | 0.9  |
| Average Minutes Pedaled/Day Used                   | 31.1   | 31.6 |
| Average Minutes Pedaled/Pedal Bout                 | 16.1   | 17.2 |

23  
24  
25  
26  
27  
28  
29  
30  
31  
32  
33  
34  
35  
36  
37  
38  
39  
40  
41 293  
42  
43 294 When asked to rate the helpfulness of each intervention feature for reducing their sedentary  
44  
45 295 time, participants rated the pedal machine biofeedback display, the pedometer, self-monitoring activity  
46  
47 296 on the website as “extremely helpful” (median Likert score = 5.0; Table 5). Participants rated the email  
48  
49 297 reminders to log daily activity and access to the pedal machine as “quite helpful” ((median Likert score  
50  
51 298 = 5.0; Table 5).  
52  
53  
54 299  
55  
56 300  
57  
58 301  
59  
60

**Table 5** : Quartile and median Likert scale responses (1=Not at all helpful; 2=A little helpful; 3=moderately helpful; 4=Quite helpful; 5=Extremely helpful) on helpfulness of individual intervention components for reducing sedentary time (N=23).

| Please rate how helpful each of the following intervention components was in reducing your daily sedentary time. | Likert Scale |        |     |
|------------------------------------------------------------------------------------------------------------------|--------------|--------|-----|
|                                                                                                                  | Q1           | Median | Q3  |
| Pedal machine biofeedback display (minutes pedaled, calories burned, etc.)                                       | 4.0          | 5.0    | 5.0 |
| Wearing the pedometer                                                                                            | 4.0          | 5.0    | 5.0 |
| Self-monitoring daily steps and pedal time on the website                                                        | 4.0          | 5.0    | 5.0 |
| Email reminders to log physical activity on website                                                              | 4.0          | 4.0    | 5.0 |
| Access to pedal exercise machine at work                                                                         | 4.0          | 4.0    | 5.0 |
| 'Walk Across America' Group Challenge on website                                                                 | 3.0          | 3.0    | 5.0 |
| Social networking features on website (profile, newsfeed, messaging)                                             | 3.0          | 3.0    | 4.0 |
| Environmental features (Walkscore, information on facilities)                                                    | 3.0          | 3.0    | 3.8 |

## DISCUSSION

The primary findings of this study suggest that this multicomponent intervention resulted in significant reductions in both absolute and relative time spent sedentary in a small sample of sedentary, overweight employees. The decreased sedentary time observed among the intervention group appears to have been at least partially replaced by an increase in light and moderate intensity activity. Our findings are important as they expand upon the paucity of research aimed specifically at reducing sedentary time. Few worksite studies have been conducted that have

1  
2 315 specifically targeted reducing sedentary time.[17] Of the interventions that have been conducted in  
3  
4 316 the worksite, most have relied upon self-report measures of sedentary time[17] and have been  
5  
6 317 conducted over a relatively short duration[18 19]. Our study utilized an objective measure of  
7  
8 318 sedentary behavior and was conducted over 12 weeks. The present study builds upon past studies as  
9  
10  
11 319 our study was among the first to demonstrate significant reductions in objectively measured sedentary  
12  
13 320 time when compared to a control group. This is important, as it has been suggested that decreasing  
14  
15 321 sedentary time can result in improved health benefits independent of physical activity.[2 29-31]  
16

17 322 Sedentary time amongst the intervention group was reduced by an average of 59 minutes/day  
18  
19 323 or 3.7% of daily time. Our findings are within the range of similar studies. For example, Kozy-Keadle  
20  
21 324 et al. found daily sedentary time reduced from 67.0% to 62.7% after a simple, seven day intervention  
22  
23 325 that included educational materials on sedentary health risks and tips to reduce sedentary time.[19]  
24  
25 326 However, this study did not include a control group. In a study that did include a control group, Evans  
26  
27 327 et al. found no between group differences in objectively measured sitting time after five days of point-  
28  
29 328 of-choice software reminders to stand up every 30 minutes while at work.[18]  
30  
31

32 329 We also observed a group x time interaction effect for waist circumference. This finding is  
33  
34 330 important as waist circumference has been shown to predict mortality amongst adults with coronary  
35  
36 331 artery disease.[32] Confidence in this finding is strengthened by past studies that have reported  
37  
38 332 higher levels of sedentary behavior to be associated with a higher waist circumference[33] and  
39  
40 333 interruptions from sedentary time to be associated with reduced waist circumference levels.[8]  
41  
42 334 Furthermore, this finding is consistent with findings of a previous 16-week internet-delivered physical  
43  
44 335 activity program which demonstrated modest improvements in daily steps and waist  
45  
46 336 circumference.[34] The lack of changes in other cardiometabolic risk factors may be due to the low  
47  
48 337 intensity of the intervention as well as the limited duration of 12 weeks. Studies of longer duration are  
49  
50 338 needed to determine whether reducing sedentary time results in cardiometabolic risk reduction.  
51  
52

53  
54 339 Participant compliance to the website overall was high with participants logging into the  
55  
56 340 website an average of 71% of all intervention days. This is important as past internet-delivered  
57  
58 341 intervention studies have identified engagement to be a challenge [35 36] and a predictor of  
59  
60



1  
2 342 intervention success.[37] By comparison, Lewis et al. reported participants logged on to a physical  
3  
4 343 activity website a median number of 50 times (13.7%) over 12 months.[38] Reasons for such high  
5  
6 344 website compliance in the present study may be due to the tailoring of the website to include locally  
7  
8 345 relevant images and messages.

10  
11 346 Participant compliance with the pedal machines in the present 12 week trial (31 minutes/day)  
12  
13 347 was higher when compared to compliance in our previous four week trial (23 minutes/day).[10] These  
14  
15 348 findings suggest the added motivational intervention, which included suggestions for setting goals and  
16  
17 349 finding time to pedal each day, resulted in improved daily compliance that was sustained over a  
18  
19 350 longer duration. Despite the logistical limitation of the portable pedal machine when paired with  
20  
21 351 standard height desks (i.e., many participants reported their knees hit the underside of their desk  
22  
23 352 while pedaling), participants used the pedal machine on a fairly regular basis. In order to maximize  
24  
25 353 compliance with such portable pedal machines in future studies, it is recommended these devices be  
26  
27 354 paired with height adjustable desks that allow for comfortable pedaling during computer work tasks.

29  
30 355 Intervention participants reported features that provided feedback including the pedal machine  
31  
32 356 tracking software, pedometers and self-monitoring daily activity on the website (which was  
33  
34 357 immediately followed by a graph illustrating the individual's daily progress) as the most helpful  
35  
36 358 features for reducing their daily sedentary time. This information is important and could be used to  
37  
38 359 inform future interventions aimed at reducing sedentary behavior. This finding is consistent with past  
39  
40 360 studies which have found biofeedback as a useful tool to improve health behaviors.[39 40]

42  
43 361 The main limitation of the study was the limited generalizability due to a small sample size that  
44  
45 362 comprised primarily of middle-aged females working at a single institution. We also experienced  
46  
47 363 differential drop out, although follow-up analyses indicate no differences between those that dropped  
48  
49 364 and those that completed amongst the control group for age ( $P=0.40$ ), BMI ( $P=0.52$ ), or daily  
50  
51 365 sedentary time ( $P=0.22$ ).

53  
54 366 The present study is among the first interventions aimed specifically at reducing daily  
55  
56 367 sedentary time to demonstrate between group differences in objectively measured sedentary time.  
57  
58 368 Compliance with the motivational website was high while compliance with the pedal machine was  
59  
60

1  
2 369 moderate. While a group x time interaction was found for waist circumference, no between group  
3  
4 370 differences were observed for any other cardiometabolic risk factors. More sedentary focused  
5  
6 371 interventions are needed to examine whether reducing sedentary time can be sustained long-term  
7  
8  
9 372 and whether long-term changes result in significant reductions in risk for chronic diseases.

10  
11 373  
12  
13 374  
14  
15 375 **Funding Source:** This study was funded by Oak Ridge Associated Universities grant #212112.

16  
17 376  
18  
19 377 **Competing Interests:** All authors have completed the ICMJE uniform disclosure form at  
20  
21 [www.icmje.org/coi\\_disclosure.pdf](http://www.icmje.org/coi_disclosure.pdf) and declare: no financial support from the funder Oak Ridge  
22 378 Associated Universities for the submitted work, no financial relationships with any organizations that  
23  
24 379 might have an interest in the submitted work in the previous three years, and no other relationships or  
25  
26 380 activities that could appear to have influenced the submitted work.”  
27  
28 381  
29  
30

31 382 **Contributorship Statement:**

- 32  
33  
34  
35 383
  - Dr. Lucas Carr was responsible for the design of the study and lead the manuscript

36  
37 384 preparation.

38  
39 385
  - Dr. Kristina Karvinen assisted in the design of the study and assisted in the manuscript

40  
41 386 preparation.

42  
43  
44 387
  - Ms. Mallory Peavler contributed to the manuscript preparation and was solely responsible for

45  
46 388 leading the intervention which included duties of interacting with participants on a daily basis.

47  
48 389
  - Ms. Rebecca Smith and Ms. Kayla Cangelosi both contributed to the manuscript preparation

49  
50 390 and were responsible for collecting data at the baseline and post-intervention time points.

51  
52

53  
54 391 **Data Sharing**

- 55 392
  - Extra data is available by emailing Dr. Lucas Carr at [lucas-carr@uiowa.edu](mailto:lucas-carr@uiowa.edu).

56 393  
57 394  
58  
59  
60

1  
2 395 **Figure Legend**  
3  
4 396

6 397 **Figure 1.** Sequence of events and recruitment/enrollment schematic. Study was coordinated at East  
8  
9 398 Carolina University, Greenville, NC, from June 2011-June 2012.  
10

11 399  
12  
13 400 **Figure 2.** Images of intervention features: A. Portable pedal machine, B. Pedal machine activity  
14  
15 401 tracking software screenshot, C. Pedal machine monitor feedback; D. Pedometer; and E. Screenshot  
16  
17 402 of the Walk Across American group challenge.  
18  
19 403  
20  
21 404  
22  
23 405  
24  
25 406  
26  
27 407  
28  
29 408  
30  
31 409  
32  
33 410  
34  
35 411  
36  
37 412  
38  
39 413  
40  
41 414  
42  
43 415  
44  
45 416  
46  
47 417  
48  
49 418  
50  
51 419  
52  
53 420  
54  
55 421  
56  
57 422  
58  
59 423  
60

## REFERENCES

1. Warren TY, Barry V, Hooker SP, Sui X, Church TS, Blair SN. Sedentary behaviors increase risk of cardiovascular disease mortality in men. *Medicine and science in sports and exercise* 2010;**42**(5):879-85 doi: 10.1249/MSS.0b013e3181c3aa7e[published Online First: Epub Date]].
2. Thorp AA, Healy GN, Owen N, et al. Deleterious associations of sitting time and television viewing time with cardiometabolic risk biomarkers: Australian Diabetes, Obesity and Lifestyle (AusDiab) study 2004-2005. *Diabetes care* 2010;**33**(2):327-34 doi: dc09-0493 [pii] 10.2337/dc09-0493[published Online First: Epub Date]].
3. Roberts CK, Vaziri ND, Sindhu RK, Barnard RJ. A high-fat, refined-carbohydrate diet affects renal NO synthase protein expression and salt sensitivity. *J Appl Physiol* 2003;**94**(3):941-6
4. Beunza JJ, Martinez-Gonzalez MA, Ebrahim S, et al. Sedentary behaviors and the risk of incident hypertension: the SUN Cohort. *Am J Hypertens* 2007;**20**(11):1156-62 doi: S0895-7061(07)00347-0 [pii] 10.1016/j.amjhyper.2007.06.007[published Online First: Epub Date]].
5. Ford ES, Kohl HW, 3rd, Mokdad AH, Ajani UA. Sedentary behavior, physical activity, and the metabolic syndrome among U.S. adults. *Obesity research* 2005;**13**(3):608-14 doi: 13/3/608 [pii] 10.1038/oby.2005.65[published Online First: Epub Date]].
6. Must A, Tybor DJ. Physical activity and sedentary behavior: a review of longitudinal studies of weight and adiposity in youth. *Int J Obes (Lond)* 2005;**29 Suppl 2**:S84-96
7. Lubans DR, Morgan PJ, Tudor-Locke C. A systematic review of studies using pedometers to promote physical activity among youth. *Preventive medicine* 2009;**48**(4):307-15 doi: 10.1016/j.ypmed.2009.02.014[published Online First: Epub Date]].
8. Healy GN, Dunstan DW, Salmon J, et al. Breaks in sedentary time: beneficial associations with metabolic risk. *Diabetes care* 2008;**31**(4):661-6 doi: dc07-2046 [pii] 10.2337/dc07-2046[published Online First: Epub Date]].
9. Marshall SJ, Ramirez E. Reducing Sedentary Behavior: A New Paradigm in Physical Activity Promotion. *American Journal of Lifestyle Medicine* 2010;**5**(6):518-30
10. Carr LJ, Walaska KA, Marcus BH. Feasibility of a portable pedal exercise machine for reducing sedentary time in the workplace. *Br J Sports Med* 2012;**46**(6):430-5 doi: 10.1136/bjism.2010.079574[published Online First: Epub Date]].
11. McCrady SK, Levine JA. Sedentariness at work: how much do we really sit? *Obesity (Silver Spring)* 2009;**17**(11):2103-5 doi: oby2009117 [pii] 10.1038/oby.2009.117[published Online First: Epub Date]].
12. Brownson RC, Boehmer TK, Luke DA. Declining rates of physical activity in the United States: what are the contributors? *Annu Rev Public Health* 2005;**26**:421-43 doi: 10.1146/annurev.publhealth.26.021304.144437[published Online First: Epub Date]].
13. Church TS, Thomas DM, Tudor-Locke C, et al. Trends over 5 decades in U.S. occupation-related physical activity and their associations with obesity. *PLoS One* 2011;**6**(5):e19657 doi: 10.1371/journal.pone.0019657 PONE-D-11-03371 [pii][published Online First: Epub Date]].
14. Conn VS, Hafdahl AR, Cooper PS, Brown LM, Lusk SL. Meta-analysis of workplace physical activity interventions. *American journal of preventive medicine* 2009;**37**(4):330-9 doi: 10.1016/j.amepre.2009.06.008[published Online First: Epub Date]].
15. Dishman RK, Oldenburg B, O'Neal H, Shephard RJ. Worksite physical activity interventions. *American journal of preventive medicine* 1998;**15**(4):344-61
16. Stokols D, Pelletier KR, Fielding JE. The ecology of work and health: research and policy directions for the promotion of employee health. *Health Educ Q* 1996;**23**(2):137-58
17. Chau JY, der Ploeg HP, van Uffelen JG, et al. Are workplace interventions to reduce sitting effective? A systematic review. *Preventive medicine* 2010;**51**(5):352-6 doi: S0091-7435(10)00351-8 [pii] 10.1016/j.ypmed.2010.08.012[published Online First: Epub Date]].

- 1  
2 474 18. Evans RE, Fawole HO, Sheriff SA, Dall PM, Grant PM, Ryan CG. Point-of-choice prompts to  
3 475 reduce sitting time at work: a randomized trial. *American journal of preventive medicine*  
4 476 2012;**43**(3):293-7 doi: 10.1016/j.amepre.2012.05.010[published Online First: Epub Date]].  
5 477 19. Kozey-Keadle S, Libertine A, Staudenmayer J, Freedson P. The Feasibility of Reducing and  
6 478 Measuring Sedentary Time among Overweight, Non-Exercising Office Workers. *J Obes*  
7 479 2012;**2012**:282303 doi: 10.1155/2012/282303[published Online First: Epub Date]].  
8 480 20. Random.org. Random Sequence Generator. Secondary Random Sequence Generator 2011.  
9 481 <http://www.random.org/sequences/>.  
10 482 21. Bandura, editor. *Social Foundations of Thought and Action: A Social Cognitive Theory*.  
11 483 Englewood Cliffs, NJ: Prentice-Hall, 1986.  
12 484 22. Mudge S, Taylor D, Chang O, Wong R. Test-retest reliability of the StepWatch Activity Monitor  
13 485 outputs in healthy adults. *J Phys Act Health* 2010;**7**(5):671-6  
14 486 23. Foster RC, Lanningham-Foster LM, Manohar C, et al. Precision and accuracy of an ankle-worn  
15 487 accelerometer-based pedometer in step counting and energy expenditure. *Preventive*  
16 488 *medicine* 2005;**41**(3-4):778-83 doi: S0091-7435(05)00109-X [pii]  
17 489 10.1016/j.yjmed.2005.07.006[published Online First: Epub Date]].  
18 490 24. Carr LJ, Mahar MT. Accuracy of intensity and inclinometer output of three activity monitors for  
19 491 identification of sedentary behavior and light-intensity activity. *J Obes* 2012;**2012**:460271 doi:  
20 492 10.1155/2012/460271[published Online First: Epub Date]].  
21 493 25. ACSM. ACSM's Guidelines for Exercise Testing and Prescription. In: ACSM, ed. Seventh ed:  
22 494 Lippincott Williams & Wilkins, 2006.  
23 495 26. Issa JS, Strunz C, Giannini SD, Forti N, Diamant J. [Precision and accuracy of blood lipid  
24 496 analyses by a portable device (Cholestech-LDX)]. *Arquivos brasileiros de cardiologia*  
25 497 1996;**66**(6):339-42  
26 498 27. Ebbeling CB, Ward A, Puleo EM, Widrick J, Rippe JM. Development of a single-stage submaximal  
27 499 treadmill walking test. *Medicine and science in sports and exercise* 1991;**23**(8):966-73  
28 500 28. Cohen J, editor. *Statistical power analysis for the behavioral sciences. 2nd Edition*. Hillsdale, NJ:  
29 501 Erlbaum, 1988.  
30 502 29. Owen N, Sparling PB, Healy GN, Dunstan DW, Matthews CE. Sedentary behavior: emerging  
31 503 evidence for a new health risk. *Mayo Clin Proc* 2010;**85**(12):1138-41 doi: 85/12/1138 [pii]  
32 504 10.4065/mcp.2010.0444[published Online First: Epub Date]].  
33 505 30. Rhodes RE, Mark RS, Temmel CP. Adult sedentary behavior: a systematic review. *American*  
34 506 *journal of preventive medicine* 2012;**42**(3):e3-28 doi: 10.1016/j.amepre.2011.10.020[published  
35 507 Online First: Epub Date]].  
36 508 31. Thorp AA, Owen N, Neuhaus M, Dunstan DW. Sedentary behaviors and subsequent health  
37 509 outcomes in adults a systematic review of longitudinal studies, 1996-2011. *American journal of*  
38 510 *preventive medicine* 2011;**41**(2):207-15 doi: 10.1016/j.amepre.2011.05.004[published Online  
39 511 First: Epub Date]].  
40 512 32. Coutinho T, Goel K, Correa de Sa D, et al. Combining body mass index with measures of central  
41 513 obesity in the assessment of mortality in subjects with coronary disease: role of "normal  
42 514 weight central obesity". *J Am Coll Cardiol* 2013;**61**(5):553-60 doi:  
43 515 10.1016/j.jacc.2012.10.035[published Online First: Epub Date]].  
44 516 33. Wijndaele K, Duvigneaud N, Matton L, et al. Sedentary behaviour, physical activity and a  
45 517 continuous metabolic syndrome risk score in adults. *European journal of clinical nutrition*  
46 518 2009;**63**(3):421-9 doi: 10.1038/sj.ejcn.1602944[published Online First: Epub Date]].  
47 519 34. Carr LJ, Barte RT, Dorozynski C, Broomfield JF, Smith ML, Smith DT. Internet-delivered  
48 520 behavior change program increases physical activity and improves cardiometabolic disease  
49 521 risk factors in sedentary adults: results of a randomized controlled trial. *Preventive medicine*  
50 522 2008;**46**(5):431-8 doi: S0091-7435(07)00503-8 [pii]  
51 523 10.1016/j.yjmed.2007.12.005[published Online First: Epub Date]].  
52 524 35. Spittaels H, De Bourdeaudhuij I, Vandelanotte C. Evaluation of a website-delivered computer-  
53 525 tailored intervention for increasing physical activity in the general population. *Preventive*  
54 526 *medicine* 2007;**44**(3):209-17 doi: S0091-7435(06)00502-0 [pii]

- 1  
2 527 10.1016/j.ypped.2006.11.010[published Online First: Epub Date]].  
3 528 36. Vandelanotte C, Spathonis KM, Eakin EG, Owen N. Website-delivered physical activity  
4 529 interventions a review of the literature. American journal of preventive medicine 2007;**33**(1):54-  
5 530 64  
6 531 37. van den Berg MH, Ronday HK, Peeters AJ, et al. Engagement and satisfaction with an Internet-  
7 532 based physical activity intervention in patients with rheumatoid arthritis. Rheumatology  
8 533 (Oxford, England) 2007;**46**(3):545-52 doi: 10.1093/rheumatology/kel341[published Online  
9 534 First: Epub Date]].  
10 535 38. Lewis B, Williams D, Dunsiger S, et al. User attitudes towards physical activity websites in a  
11 536 randomized controlled trial. Preventive medicine 2008;**47**(5):508-13 doi: S0091-  
12 537 7435(08)00400-3 [pii]  
13 538 10.1016/j.ypped.2008.07.020[published Online First: Epub Date]].  
14 539 39. Proper KI, van der Beek AJ, Hildebrandt VH, Twisk JW, van Mechelen W. Short term effect of  
15 540 feedback on fitness and health measurements on self reported appraisal of the stage of  
16 541 change. Br J Sports Med 2003;**37**(6):529-34  
17 542 40. Bravata DM, Smith-Spangler C, Sundaram V, et al. Using pedometers to increase physical activity  
18 543 and improve health: a systematic review. Jama 2007;**298**(19):2296-304  
19 544  
20 545  
21  
22  
23  
24 546  
25  
26  
27  
28  
29  
30  
31  
32  
33  
34  
35  
36  
37  
38  
39  
40  
41  
42  
43  
44  
45  
46  
47  
48  
49  
50  
51  
52  
53  
54  
55  
56  
57  
58  
59  
60

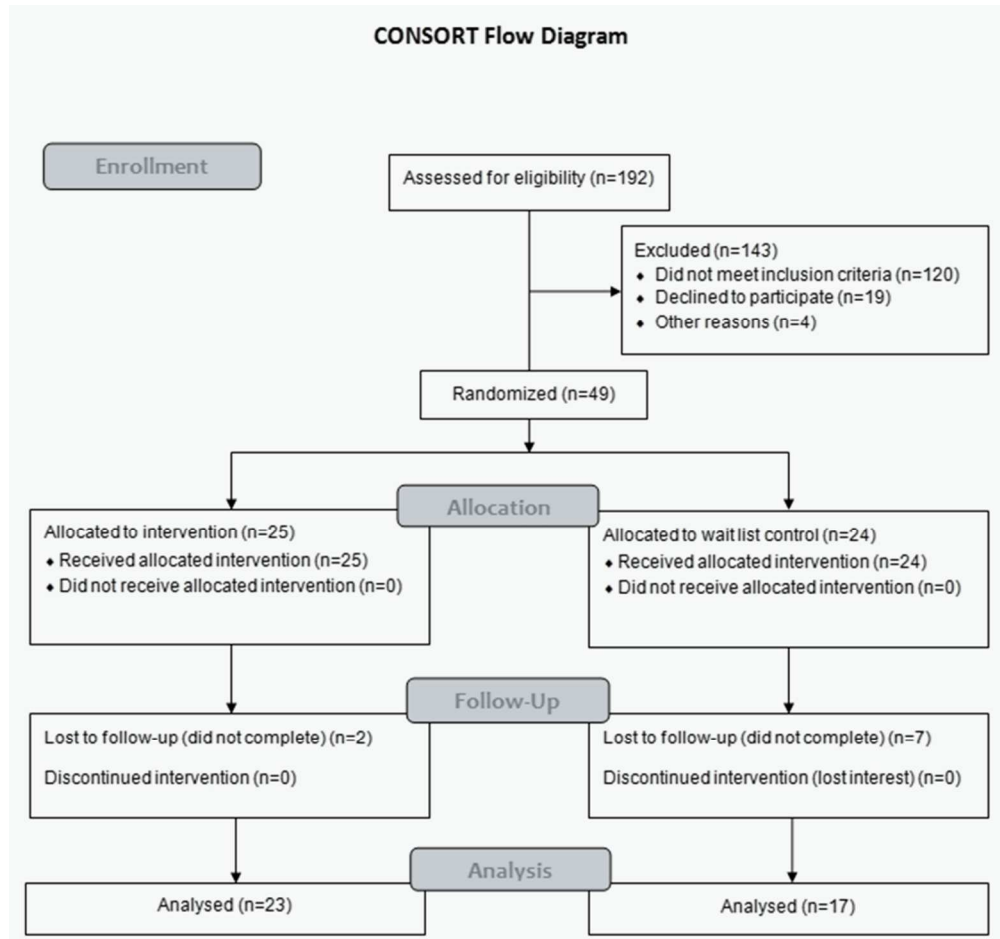

177x167mm (150 x 150 DPI)

only

1  
2  
3  
4  
5  
6  
7  
8  
9  
10  
11  
12  
13  
14  
15  
16  
17  
18  
19  
20  
21  
22  
23  
24  
25  
26  
27  
28  
29  
30  
31  
32  
33  
34  
35  
36  
37  
38  
39  
40  
41  
42  
43  
44  
45  
46  
47  
48  
49  
50  
51  
52  
53  
54  
55  
56  
57  
58  
59  
60

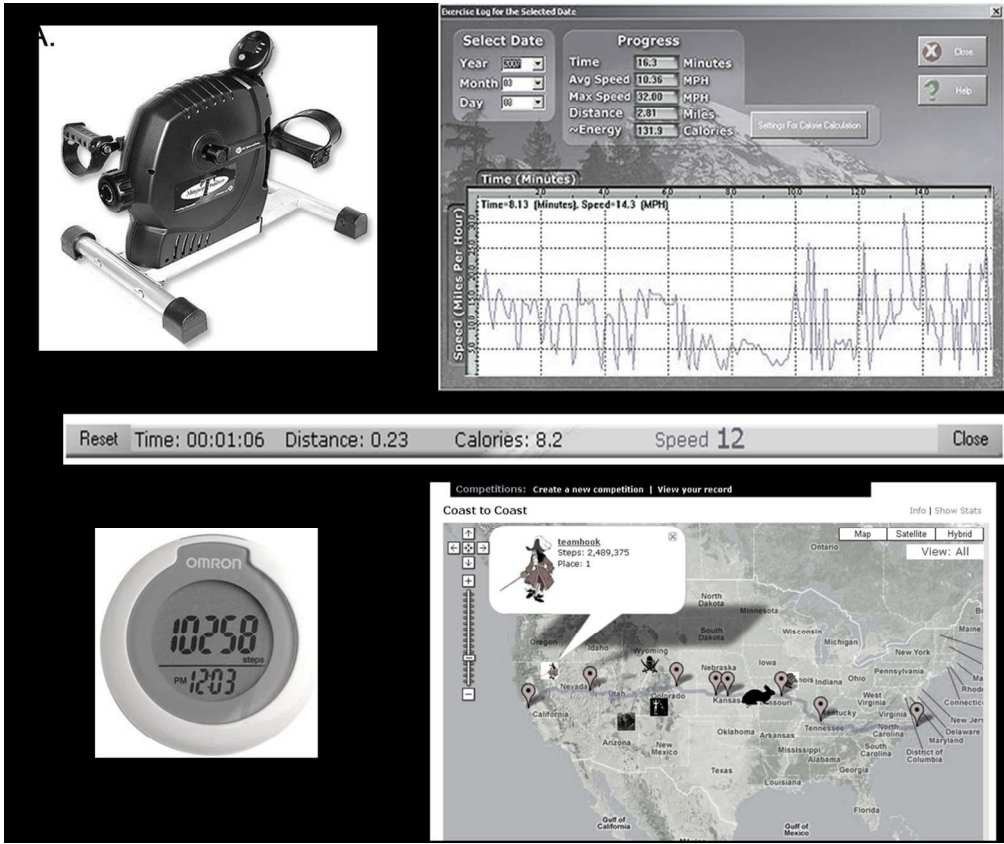

202x169mm (150 x 150 DPI)

For peer review only



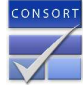

CONSORT 2010 checklist of information to include when reporting a randomised trial\*

| Section/Topic                    | Item No | Checklist item                                                                                                                                                                              | Reported on page No |
|----------------------------------|---------|---------------------------------------------------------------------------------------------------------------------------------------------------------------------------------------------|---------------------|
| <b>Title and abstract</b>        |         |                                                                                                                                                                                             |                     |
|                                  | 1a      | Identification as a randomised trial in the title                                                                                                                                           | 1                   |
|                                  | 1b      | Structured summary of trial design, methods, results, and conclusions (for specific guidance see CONSORT for abstracts)                                                                     | 2                   |
| <b>Introduction</b>              |         |                                                                                                                                                                                             |                     |
| Background and objectives        | 2a      | Scientific background and explanation of rationale                                                                                                                                          | 3-4                 |
|                                  | 2b      | Specific objectives or hypotheses                                                                                                                                                           | 4                   |
| <b>Methods</b>                   |         |                                                                                                                                                                                             |                     |
| Trial design                     | 3a      | Description of trial design (such as parallel, factorial) including allocation ratio                                                                                                        | 5                   |
|                                  | 3b      | Important changes to methods after trial commencement (such as eligibility criteria), with reasons                                                                                          | NA                  |
| Participants                     | 4a      | Eligibility criteria for participants                                                                                                                                                       | 4-5                 |
|                                  | 4b      | Settings and locations where the data were collected                                                                                                                                        | 7                   |
| Interventions                    | 5       | The interventions for each group with sufficient details to allow replication, including how and when they were actually administered                                                       | 5-6                 |
| Outcomes                         | 6a      | Completely defined pre-specified primary and secondary outcome measures, including how and when they were assessed                                                                          | 7                   |
|                                  | 6b      | Any changes to trial outcomes after the trial commenced, with reasons                                                                                                                       | NA                  |
| Sample size                      | 7a      | How sample size was determined                                                                                                                                                              | 8                   |
|                                  | 7b      | When applicable, explanation of any interim analyses and stopping guidelines                                                                                                                | NA                  |
| <b>Randomisation:</b>            |         |                                                                                                                                                                                             |                     |
| Sequence generation              | 8a      | Method used to generate the random allocation sequence                                                                                                                                      | 5                   |
|                                  | 8b      | Type of randomisation; details of any restriction (such as blocking and block size)                                                                                                         | 5                   |
| Allocation concealment mechanism | 9       | Mechanism used to implement the random allocation sequence (such as sequentially numbered containers), describing any steps taken to conceal the sequence until interventions were assigned | 5                   |
| Implementation                   | 10      | Who generated the random allocation sequence, who enrolled participants, and who assigned participants to interventions                                                                     | 5                   |

|    |                                                      |     |                                                                                                                                                   |
|----|------------------------------------------------------|-----|---------------------------------------------------------------------------------------------------------------------------------------------------|
| 1  |                                                      |     |                                                                                                                                                   |
| 2  | Blinding                                             | 11a | If done, who was blinded after assignment to interventions (for example, participants, care providers, those assessing outcomes) and how          |
| 3  |                                                      |     | 5&7                                                                                                                                               |
| 4  |                                                      | 11b | If relevant, description of the similarity of interventions                                                                                       |
| 5  |                                                      |     | NA                                                                                                                                                |
| 6  | Statistical methods                                  | 12a | Statistical methods used to compare groups for primary and secondary outcomes                                                                     |
| 7  |                                                      | 12b | Methods for additional analyses, such as subgroup analyses and adjusted analyses                                                                  |
| 8  |                                                      |     | NA                                                                                                                                                |
| 9  | <b>Results</b>                                       |     |                                                                                                                                                   |
| 10 | Participant flow (a diagram is strongly recommended) | 13a | For each group, the numbers of participants who were randomly assigned, received intended treatment, and were analysed for the primary outcome    |
| 11 |                                                      | 13b | For each group, losses and exclusions after randomisation, together with reasons                                                                  |
| 12 |                                                      |     | 5                                                                                                                                                 |
| 13 | Recruitment                                          | 14a | Dates defining the periods of recruitment and follow-up                                                                                           |
| 14 |                                                      | 14b | Why the trial ended or was stopped                                                                                                                |
| 15 |                                                      |     | 5                                                                                                                                                 |
| 16 | Baseline data                                        | 15  | A table showing baseline demographic and clinical characteristics for each group                                                                  |
| 17 | Numbers analysed                                     | 16  | For each group, number of participants (denominator) included in each analysis and whether the analysis was by original assigned groups           |
| 18 |                                                      |     | Table 1 (p.9)                                                                                                                                     |
| 19 |                                                      |     | 5                                                                                                                                                 |
| 20 | Outcomes and estimation                              | 17a | For each primary and secondary outcome, results for each group, and the estimated effect size and its precision (such as 95% confidence interval) |
| 21 |                                                      | 17b | For binary outcomes, presentation of both absolute and relative effect sizes is recommended                                                       |
| 22 |                                                      |     | 8-13                                                                                                                                              |
| 23 | Ancillary analyses                                   | 18  | Results of any other analyses performed, including subgroup analyses and adjusted analyses, distinguishing pre-specified from exploratory         |
| 24 |                                                      |     | NA                                                                                                                                                |
| 25 |                                                      |     | 8-13                                                                                                                                              |
| 26 | Harms                                                | 19  | All important harms or unintended effects in each group (for specific guidance see CONSORT for harms)                                             |
| 27 |                                                      |     | NA                                                                                                                                                |
| 28 | <b>Discussion</b>                                    |     |                                                                                                                                                   |
| 29 | Limitations                                          | 20  | Trial limitations, addressing sources of potential bias, imprecision, and, if relevant, multiplicity of analyses                                  |
| 30 | Generalisability                                     | 21  | Generalisability (external validity, applicability) of the trial findings                                                                         |
| 31 | Interpretation                                       | 22  | Interpretation consistent with results, balancing benefits and harms, and considering other relevant evidence                                     |
| 32 |                                                      |     | 15                                                                                                                                                |
| 33 |                                                      |     | 15                                                                                                                                                |
| 34 |                                                      |     | 13-16                                                                                                                                             |
| 35 | <b>Other information</b>                             |     |                                                                                                                                                   |
| 36 | Registration                                         | 23  | Registration number and name of trial registry                                                                                                    |
| 37 |                                                      |     | ClinicalTrials.gov (NCT01371084)                                                                                                                  |
| 38 |                                                      |     | 4)                                                                                                                                                |
| 39 | Protocol                                             | 24  | Where the full trial protocol can be accessed, if available                                                                                       |
| 40 |                                                      |     | Oak Ridge Associated Universities                                                                                                                 |
| 41 |                                                      |     |                                                                                                                                                   |
| 42 |                                                      |     |                                                                                                                                                   |
| 43 |                                                      |     |                                                                                                                                                   |
| 44 | CONSORT 2010 checklist                               |     |                                                                                                                                                   |
| 45 |                                                      |     |                                                                                                                                                   |
| 46 |                                                      |     |                                                                                                                                                   |
| 47 |                                                      |     |                                                                                                                                                   |
| 48 |                                                      |     |                                                                                                                                                   |
| 49 |                                                      |     |                                                                                                                                                   |

---

Grant  
(#212112)

---

1  
2  
3  
4  
5 Funding 25 Sources of funding and other support (such as supply of drugs), role of funders  
6  
7

---

8 \*We strongly recommend reading this statement in conjunction with the CONSORT 2010 Explanation and Elaboration for important clarifications on all the  
9 items. If relevant, we also recommend reading CONSORT extensions for cluster randomised trials, non-inferiority and equivalence trials, non-pharmacological  
10 treatments, herbal interventions, and pragmatic trials. Additional extensions are forthcoming: for those and for up to date references relevant to this checklist,  
11 see [www.consort-statement.org](http://www.consort-statement.org).  
12  
13  
14  
15  
16  
17  
18  
19  
20  
21  
22  
23  
24  
25  
26  
27  
28  
29  
30  
31  
32  
33  
34  
35  
36  
37  
38  
39  
40  
41  
42  
43  
44  
45  
46  
47  
48  
49

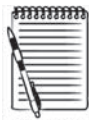PRESS  
RELEASE

# Feasibility of a portable pedal exercise machine for reducing sedentary time in the workplace

Lucas J Carr,<sup>1,2</sup> Kristen A Walaska,<sup>1</sup> Bess H Marcus<sup>1,3</sup>

<sup>1</sup>Centers for Behavioral and Preventive Medicine, The Miriam Hospital, Providence, Rhode Island, USA

<sup>2</sup>Department of Exercise and Sport Science, East Carolina University, Greenville, North Carolina, USA

<sup>3</sup>Program in Public Health, Brown University, Providence, Rhode Island, USA

## Correspondence to

Dr Lucas J Carr, Department of Exercise and Sport Science, East Carolina University, 172 Minges Coliseum, Greenville, NC 27858, USA; [carrlj@ecu.edu](mailto:carrlj@ecu.edu)

Accepted 3 December 2010

## ABSTRACT

**Background** Sedentary time is independently associated with an increased risk of metabolic disease. Worksite interventions designed to decrease sedentary time may serve to improve employee health.

**Objective** The purpose of this study is to test the feasibility and use of a pedal exercise machine for reducing workplace sedentary time.

**Methods** Eighteen full-time employees (mean age+SD 40.2+10.7 years; 88% female) working in sedentary occupations were recruited for participation. Demographic and anthropometric data were collected at baseline and 4 weeks. Participants were provided access to a pedal exercise machine for 4 weeks at work. Use of the device was measured objectively by exercise tracking software, which monitors pedal activity and provides the user real-time feedback (eg, speed, time, distance, calories). At 4 weeks, participants completed a feasibility questionnaire.

**Results** Participants reported sitting 83% of their working days. Participants used the pedal machines an average of 12.2+6.6 out of a possible 20 working days and pedalled an average of 23.4+20.4 min each day used. Feasibility data indicate that participants found the machines feasible for use at work. Participants also reported sedentary time at work decreased due to the machine.

**Discussion** Findings from this study suggest that this pedal machine may be a feasible tool for reducing sedentary time while at work. These findings hold public health significance due to the growing number of sedentary jobs in the USA and the potential of the device for use in large-scale worksite health programmes.

The health-related benefits of regular moderate and vigorous intensity physical activity have been well established.<sup>1-3</sup> Conversely, physical inactivity is a leading preventable cause of death and all-cause mortality,<sup>4</sup> and has been referred to as one of the most important public health problems of the 21st century.<sup>5</sup> Within the realm of physical inactivity, researchers of the past decade have explored more specifically the health implications and associated health mechanisms of 'sedentary behaviour'.<sup>6</sup> Recent reviews have defined sedentary behaviour as 'activities that do not increase energy expenditure substantially above resting levels' and include activities such as lying down, sitting and using screen-based technologies such as televisions and computers.<sup>7,8</sup> Interestingly, even short bouts of reduced energy expenditure have been associated with substantial detriments to metabolic health in animals models.<sup>9-12</sup> Emerging studies with humans seem to corroborate such

findings, as time spent being sedentary has been demonstrated to be independently associated with an increased risk of metabolic diseases.<sup>13</sup> Furthermore, sedentary time in the form of sitting has been associated with an increased likelihood of being overweight/obese.<sup>14</sup> Conversely, evidence supports breaking up prolonged bouts of sedentary time as a means of improving metabolic risk factors such as body mass index (BMI), waist circumference, fasting glucose levels and triglyceride levels.<sup>15</sup>

The workplace has been identified as an ideal setting for reducing sedentary time as full-time employees working a 40 h work week spend over a third of their weekly wakeful hours at work. In addition, working days are associated with less standing time and more time sitting time compared with non-work days,<sup>16</sup> and evidence suggests occupational activity as a whole is on the decline with high physical activity occupations decreasing while low activity occupations have risen steadily over the past half century.<sup>17,18</sup>

Previous worksite programmes aimed at increasing employees' physical activity have demonstrated efficacy for increasing physical activity, with some demonstrating improvements in worksite-specific outcomes such as attendance and job stress.<sup>19,20</sup> Past worksite physical activity interventions have taken many approaches for promoting physical activity, including promoting stair use through point of decision prompts, promoting active transport and providing access to worksite fitness facilities.<sup>21,22</sup> It could be argued, however, that many of these approaches are somewhat limited with regard to their reach and impact in that they do not target the large portion of time in which the typical desk/computer-dependent employee is working and therefore sedentary. With the rise in screen-based technologies in the worksite, computer use, an identified barrier to physical activity,<sup>23</sup> has become a staple of the typical work day. Still, few worksite intervention approaches have focused specifically on reducing the sitting time of sedentary employees for improving health.<sup>24</sup> Furthermore, no worksite interventions to date have attempted to reduce sedentary time while adapting to the typical computer work environment in which sitting is necessary.

Thompson *et al*<sup>25</sup> recently tested the feasibility of a walking workstation designed to allow employees to continue their work while being active. Hospital employees in four different occupations were recruited for participation. While using the walking workstations, participants increased daily walking by an average of 2000

For peer review only - <http://bmjopen.bmj.com/site/about/guidelines.xhtml>

## Original article

steps or an equivalent of 100 kcal/day.<sup>26</sup> Participants also reported that they could perform normal work tasks (ie, computer work, professional phone calls) while using the device and declines in productivity were not reported to be an issue. However, such devices do have limitations that might prohibit widespread use such as high cost, size requirements that may not be met in small offices, lack of portability and lack of use for special needs populations such as those with orthopaedic limitations or joint pain.

McAlpine *et al*<sup>27</sup> conducted a study testing the energy expenditure of an office stepping device that seemingly addressed several of the feasibility limitations of the walking workstation. The device used in their study was portable, cost feasible, nearly silent and when attached to a personal computer (PC) connected accelerometer allowed for self-monitoring. While the stepping device did result in significant increases in energy expenditure above sitting in a controlled laboratory setting, the study did not explore the feasibility of the device in a real-life setting.

Several portable pedal exercise machines that also address many of the limitations of the walking workstation have recently become commercially available. One machine in particular, the MagneTrainer mini exercise bike (3D Innovations, LLC, Greeley, CO) is a cost feasible, stable yet portable device that can be set up in front of most standard office chairs for use while sitting and also allows for objective self-monitoring (eg, time used, distance pedalled, average speed, caloric expenditure) through a PC connection. To our knowledge, no studies have explored the feasibility or use of a portable pedal machine for reducing time spent sedentary in an occupational setting. Therefore, the primary aims of this study are to test the feasibility, acceptability and use of a portable, pedal exercise machine for reducing sedentary time in a free-living, occupationally sedentary adult population. We hypothesise that participants will find the machines feasible and acceptable for use in the sedentary work environment, and that participants will decrease their sedentary time at work as a result of using the pedal machine.

## METHODS

## Subjects

A total of 18 healthy, adult, (age 40.2+10.7 years; BMI 26.7+5.0 kg/m<sup>2</sup>; 88% female) full-time employees (self-report working a minimum of 35 h/week) working in sedentary (minimum

of 75% of working day spent sitting), desk/computer-dependent occupations were recruited from the greater Providence, Rhode Island, region for participation by local internet advertisements. Assessments occurred between October 2009 and March 2010. Participants were devoid of ambulatory/exercise limitations, and free from overt cardiovascular, metabolic, respiratory or neurological diseases as assessed by medical history screening. Participants were compensated US\$15 each time they attended two separate assessment sessions (total of US\$30 possible). Experimental protocols were approved by the Lifespan Office of Research Administration in Providence, Rhode Island, and voluntary informed consent was obtained from each participant.

## Experimental design

All testing assessments were conducted at a research laboratory located at the Miriam Hospital in Providence, Rhode Island, USA. Participants were asked to attend two testing sessions, one at baseline and a follow-up assessment 4 weeks later. Body mass was measured to the nearest 0.1 kg and height to the nearest 0.5 cm using a calibrated medical balance beam scale (Detecto, Webb City, Missouri, USA). BMI (kg/m<sup>2</sup>) was calculated as weight (kg) divided by height (m) squared. Participants completed a modified version of the 7-day physical activity recall questionnaire,<sup>28</sup> which included supplementary questions targeting the total number of hours and minutes spent 'sitting', 'standing but not walking' and 'walking' while at work over the previous 4 weeks. Participants then completed a 6-min pedal test following the Astrand-Rhyming protocol<sup>29</sup> to become familiarised with the pedal machine.

Participants were then provided access to a MagneTrainer pedal exercise machine (3D Innovations) for use while at work for four continuous weeks (figure 1). The MagneTrainer pedal exercise machine was chosen due to its relatively low cost (US\$150 for pedal machine and software), portability and compact size (18 in height, 20 in length) and its ability to monitor and record participant's daily and accumulated pedalling activity objectively through a PC connection (FitXF Exercise Tracking Software; 3D Innovations). The FitXF software also provides users with real-time feedback on pedal speed, time used, distance and calories, which is displayed on their computer monitor. The FitXF software also begins recording pedal activity the moment the user begins pedalling and stores daily and accumulated summary data for total time spent pedalling

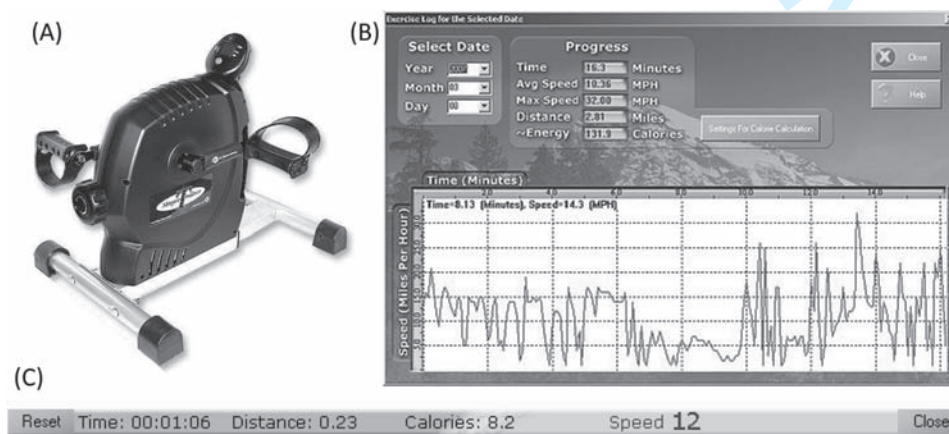

**Figure 1** (A) The portable pedal exercise machine. (B) A screenshot of the exercise log, which provides feedback on pedal use activity per day. (C) A screenshot of the real-time monitor, which provides real-time feedback to the user.

For peer review only - <http://bmjopen.bmj.com/site/about/guidelines.xhtml>

(min/day), average speed (mph/day), distance pedalled (miles/day) and estimated caloric expenditure (kcal/day). A member of the research team delivered the pedal machine to the participant's worksite, downloaded the FitXF software to the participant's work computer and worked with the participant to identify the most feasible physical set up for using the machine (eg, under the desk, next to the desk). All participants were required to gain clearance from their immediate supervisor before enrolling in the study.

Following 4 weeks, pedalling activity data were downloaded from each participant's personal work computer with the authorisation of the participant's supervisor. Participants then returned to the testing facility to repeat all baseline tests and to complete a 23-item, five-point Likert scale (1, strongly disagree; 2, disagree; 3, neutral; 4, agree; 5, strongly agree) feasibility/acceptability questionnaire designed to enquire about the user's opinions and experiences with the machine (see appendix 1) as well as the intensity at which they typically pedalled using the Borg 0–10 rating of perceived exertion (RPE) scale.<sup>30</sup> Participants were also asked to report any barriers to using the machine and/or suggested improvements for the machine while at work. Consistent with the purpose of testing the feasibility and acceptability of the pedal machine, participants were only provided access to the machine and were not provided any behavioural intervention materials for the purpose of reducing sedentary time (eg, goals, motivational resources, self-monitoring prompts) during the course of the study.

### Statistical analyses

Minutes of pedalling activity and days of pedalling activity were recorded and downloaded from the pedal machine through the FitXF exercise tracking software. Means and SD of pedal use activity were calculated and are presented in table 1. Medians and quartiles of the feasibility/acceptability data were calculated and are presented in table 2. Means and SD of average pedal time per day used for each participant were calculated and are presented in figure 2. Average pedal time among all users on days 1–20 and compliance using the pedal machine (percentage participants that pedalled each day during days 1–20) was summarised and is presented in figure 3. Paired t tests were conducted to test whether participants' time spent sitting, standing and/or walking changed over time from the baseline to the 4-week assessment. Statistical significance was set a priori at  $p < 0.05$ .

### RESULTS

On average, participants were middle aged (mean  $40.2 \pm 10.7$  years), overweight (mean BMI  $26.8 \pm 5.0$  kg/m<sup>2</sup>) and primarily

female (88%). Participants self-reported working an average of  $40.9 \pm 4.7$  h/week. Participants reported sitting an average of  $6.80 \pm 1.5$  h (83%) of their total working day. Participants pedalled an average of  $12.2 \pm 6.6$  (range 2–20 days) out of a possible 20 working days in which they had access to the pedal machine (61% compliance) and pedalled an average of  $23.4 \pm 20.4$  min on days they used the machine (see table 1 and figure 2). The estimated averages provided by the FitXF software for distance pedalled per day and caloric expenditure per day per participant equalled  $4.8 \pm 3.6$  miles/day and  $186.5 \pm 142.2$  kcal/day, respectively. Participants self-reported pedalling at an average intensity of  $4.4 \pm 1.6$  or 'somewhat hard' on the Borg 0–10 RPE scale. Average pedal time was maintained over the duration of the study, whereas the number of participants who used the machines each day (compliance) declined progressively over the course of 4 weeks (figure 3). As presented in table 2, when asked to respond to several statements pertaining to their experience with the pedal machine using a 1–5 Likert scale (1, strongly disagree; 5, strongly agree), participants reported the pedal machine to be 'easy to use', and 'as an alternative activity during bad weather'. Participants overwhelmingly reported they would 'use the pedal machine regularly at work if offered one by their employer' and reported neither their 'work productivity' nor their 'quality of work' declined as a result of using the machine at work. Participants reported 'their sedentary time at work decreased as a result of using the machine'. However, no significant differences in self-reported time spent sitting ( $p = 0.11$ ), standing ( $p = 0.65$ ) and/or walking ( $p = 0.77$ ) were observed from baseline to 4 weeks.

### DISCUSSION

Findings from this study suggest this portable pedal exercise machine is a feasible tool for reducing time spent sedentary while at work. Overall, participants reported positive experiences with the pedal machine and reported that they would use the machine at work if offered one by their employer. When provided access to the device, on average participants used the machines more than half of all working days although compliance did decrease over the course of the 4 weeks (see figure 3). This is not a surprising finding given the lack of any behavioural intervention provided to these previously sedentary participants during the course of the study. However, the average minutes pedalled per day was maintained throughout the 4 weeks and participants pedalled for an amount of time (23 min per day used) that could result in health benefits if performed on a regular basis and at an average intensity reported by participants (eg, 'somewhat hard' on the Borg 0–10 scale).<sup>3</sup> A logical next step would be to test the efficacy of combining the pedal machine with a behavioural intervention for reduc-

**Table 1** Accumulated and daily means  $\pm$  SD and ranges of pedal time, pedal speed, distance pedalled and caloric expenditure

|                                             | Mean $\pm$ SD       | Range       |
|---------------------------------------------|---------------------|-------------|
| Average total pedal time (min)              | 358.0 $\pm$ 401.7   | 4.0–1489.0  |
| Average number days pedalled                | 12.2 $\pm$ 6.6      | 2.0–20.0    |
| Average pedal time/day used (min)           | 23.4 $\pm$ 20.4     | 1.2–73.1    |
| Average pedal speed (mph)                   | 12.5 $\pm$ 4.4      | 5.3–18.4    |
| Average distance pedalled (miles)           | 69.0 $\pm$ 62.6     | 0.5–214.0   |
| Average distance pedalled/day used (miles)  | 4.8 $\pm$ 3.6       | 0.3–13.4    |
| Average total kcal expended (kcal)          | 2758.8 $\pm$ 2699.7 | 18.0–8334.8 |
| Average total kcal expended/day used (kcal) | 186.5 $\pm$ 142.2   | 9.0–501.9   |

Data were downloaded using the FitXF exercise tracking software.

For peer review only - <http://bmjopen.bmj.com/site/about/guidelines.xhtml>

## Original article

**Table 2** Quartile and median Likert scale responses (1, strongly disagree; 2, disagree; 3, neutral; 4, agree; 5, strongly agree) to feasibility/acceptability questions following 4 weeks of access to the pedal machine

| Do you agree or disagree with the following statement?                    | Q1  | Median | Q3  |
|---------------------------------------------------------------------------|-----|--------|-----|
| If offered to me by my employer, I would use the machine while at work    | 4.3 | 5.0    | 5.0 |
| My physical activity increased while at work as a result of the machine   | 3.0 | 4.0    | 5.0 |
| My physical activity increased outside of work as a result of the machine | 2.3 | 3.0    | 4.0 |
| The pedal machine is easy to use                                          | 4.0 | 4.0    | 5.0 |
| I would use the machine as an alternative activity in bad weather         | 4.0 | 5.0    | 5.0 |
| I am comfortable using the machine in the presence of others              | 3.0 | 4.0    | 5.0 |
| The time I spent sedentary at work decreased as a result of the machine   | 3.0 | 4.0    | 4.0 |
| I would use the machine while at home                                     | 4.0 | 5.0    | 5.0 |
| The machine is too noisy                                                  | 1.0 | 1.0    | 2.0 |
| My work-related productivity decreased while using the machine            | 1.0 | 1.0    | 2.8 |
| The quality of my work decreased while using the machine                  | 1.0 | 1.0    | 2.0 |
| The machine interfered with my daily work-related tasks                   | 1.0 | 1.0    | 2.0 |
| I was more tired on days I used the machine                               | 1.0 | 2.0    | 2.0 |
| I had more back pain on days I used the machine                           | 1.0 | 1.5    | 2.0 |
| I had more joint pain on days I used the machine                          | 1.0 | 1.0    | 2.0 |
| I had more muscle aches on days I used the machine                        | 1.0 | 1.5    | 2.0 |
| I could conduct a professional telephone call while using the machine     | 2.0 | 3.0    | 5.0 |
| I could conduct normal computer tasks while using the machine             | 2.0 | 3.0    | 4.0 |
| I could read comfortably while using the machine                          | 4.0 | 4.0    | 5.0 |
| The real-time monitor increased my use of the machine                     | 3.3 | 4.0    | 5.0 |

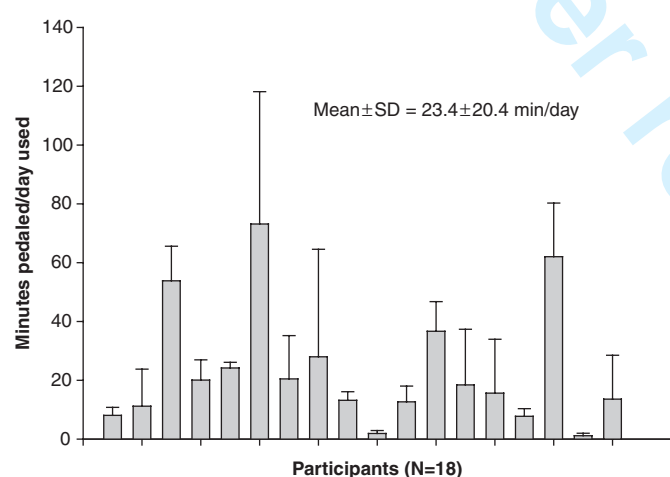**Figure 2** Average pedal time for days pedal machine was used per participant (N=18).

ing sedentary time at work and reducing the risk of chronic diseases.

When examining the pedal machine used from a human factors perspective, the MagneTrainer offers several features that make it a particularly attractive tool for future health promotion studies. Importantly, the device offers functions that are directly in line with three out of four features previously identified as necessary for technologies designed to promote physical activity and reduce sedentary time.<sup>31</sup> It is suggested that such technologies should: (1) give users proper credit for activities completed; (2) provide users personal awareness of his or her activity levels; (3) consider the practical constraints of users; and (4) support social influence.<sup>31</sup>

First, through the PC connection, the MagneTrainer pedal machine automatically and objectively monitors participants' pedalling activity (eg, credits user for activity completed). This function would be especially important from an assessment perspective in future research studies, and could potentially

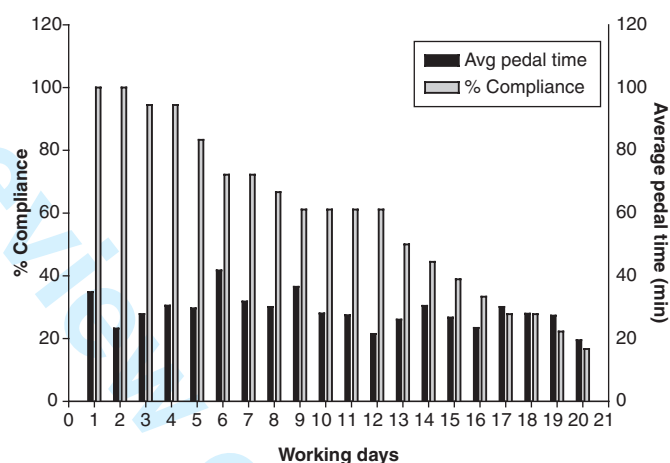**Figure 3** Average pedal time (minutes) and percentage of participants who pedaled each working day.

serve as a means to monitor employee participation in work-site wellness programmes that offer financial incentives for participation.

Second, the software enabled real-time feedback monitor and progress monitor, which summarises past activity by day and provides the user with a personal awareness of his or her current and past activity levels. The pedal machine provides users with real-time feedback of time spent pedalling (minutes), average speed (mph), maximum speed (mph), distance pedalled (miles) and estimated calories burned (kcal), which is displayed on a thin monitor that can be moved anywhere on the user's desktop. When asked to report how often they self-monitored their pedalling activity using the real-time feedback monitor (eg, time, distance, calories, speed) using a 1–4 Likert scale (1, never; 2, rarely; 3, occasionally; 4, frequently), participants reported frequently using the monitor (3.7+0.9). In addition, participants agreed the monitor increased their use of the machine (4.0+0.9 on 5-point Likert scale) suggesting that the monitor is a motivational tool.

For peer review only - <http://bmjopen.bmj.com/site/about/guidelines.xhtml>

### What is already known on this topic

Evidence of the negative impact prolonged sedentary time has on metabolic health is growing. Many new devices with the potential to reduce prolonged sedentary time have recently become available on the commercial market. However, few studies have tested the feasibility and use of such devices among free-living populations in the work environment.

### What this study adds

This study demonstrates a portable pedal exercise machine (MagneTrainer) to be feasible for use in the sedentary work environment. This study also found participants used the machines regularly without being provided a behavioural intervention. This study supports future interventions that test the efficacy of combining such devices with evidence-based behavioural approaches to reduce sedentary time at work.

Third, the portability, stability and near silent operation of the pedal machine allows this machine to be used in most typical office settings without interfering with daily operations. Importantly, portable pedal machines may serve as a tool to reduce sedentary time in the work environment without necessarily influencing the sitting time necessary for performing computer-related tasks. Participants reported the machine to be quiet, easy to use and usable in a typical office. Participants also reported that the pedal machine did not interfere with their quality of work or work productivity and did not result in any added pain to their joints or back. Participants agreed that they could read while using the pedal machine but not all users agreed they could complete computer tasks. Such practical considerations are important to consider for future worksite programmes that use the pedal machine.

Finally, while the pedal machine does not necessarily support social influence, previous worksite physical activity promotion studies using pedometers have utilised a social support component with great success.<sup>32</sup> Therefore, it stands to reason that the pedal machine could stimulate social support in the same light. In addition, our staff received 166 emails from interested participants in less than 72 h following an advertisement posted on the Lifespan hospital intranet website. The overwhelming response to this study is indicative of sedentary employees' desire to become more active while at work.

The results of this study should be interpreted with caution as this study is limited by a sample of primarily educated, Caucasian (94%) women (89%). It is possible that the pedal machine may not be viewed as favourably by men, racial and ethnic minority populations and/or individuals working in non-desk-dependent occupations. For example, individuals working in jobs that do not require a specific office space would probably not benefit from this machine. In addition, simply providing access to devices like the pedal machine is not enough to stimulate long-term use. The novelty of this device appeared to wear off over time, and may benefit from a

combination of evidence-based behavioural techniques such as regular email prompts for sustained use. Future interventions testing the efficacy of combining behavioural content with the pedal machine are warranted. Finally, the pedal machine used in this study has certain limitations that deserve mention. For instance, the accuracy of the caloric expenditure output has yet to be confirmed.

Collectively, these findings hold public health significance due to the growing number of sedentary jobs in the USA, our growing understanding of the costs sedentary behaviour has on our health, and the potential of portable pedal machines (eg, portable, low cost, objective monitoring) for use in large-scale worksite health programmes. Future physical activity promotion interventions utilising portable and practical devices such as the pedal machine are warranted.

**Contributors** The contributing authors have made substantial contributions to the conception, design, analysis and interpretation of data, drafting of the article and have all given final approval of the current version and agree to its submission.

**Acknowledgements** The authors would like to acknowledge the efforts of Ms Kristle Robles for her work in the data collection process.

**Funding** This study was funded in part by NIH grant 1T32HL076134.

**Competing interests** None.

**Patient consent** Obtained.

**Ethics approval** This study was conducted with the approval of the Miriam Hospital, Providence, Rhode Island, USA.

**Provenance and peer review** Not commissioned; externally peer reviewed.

### REFERENCES

1. Lee IM, Skerrett PJ. Physical activity and all-cause mortality: what is the dose-response relation? *Med Sci Sports Exerc* 2001;**33**(6 Suppl):S459–71.
2. Blair SN, Cheng Y, Holder JS. Is physical activity or physical fitness more important in defining health benefits? *Med Sci Sports Exerc* 2001;**33**(6 Suppl):S379–99.
3. Blair SN, Kohl HW, Gordon NF, et al. How much physical activity is good for health? *Annu Rev Public Health* 1992;**13**:99–126.
4. Mokdad AH, Marks JS, Stroup DF, et al. Actual causes of death in the United States, 2000. *JAMA* 2004;**291**:1238–45.
5. Blair SN. Physical inactivity: the biggest public health problem of the 21st century. *Br J Sports Med* 2009;**43**:1–2.
6. Owen N, Leslie E, Salmon J, et al. Environmental determinants of physical activity and sedentary behavior. *Exerc Sport Sci Rev* 2000;**28**:153–8.
7. Owen N, Healy GN, Matthews CE, et al. Too much sitting: the population health science of sedentary behavior. *Exerc Sport Sci Rev* 2010;**38**:105–13.
8. Pate RR, O'Neill JR, Lobelo F. The evolving definition of 'sedentary'. *Exerc Sport Sci Rev* 2008;**36**:173–8.
9. Booth FW, Laye MJ, Lees SJ, et al. Reduced physical activity and risk of chronic disease: the biology behind the consequences. *Eur J Appl Physiol* 2008;**102**:381–90.
10. Laye MJ, Rector RS, Borengasser SJ, et al. Cessation of daily wheel running differentially alters fat oxidation capacity in liver, muscle, and adipose tissue. *J Appl Physiol* 2009;**106**:161–8.
11. Laye MJ, Rector RS, Warner SO, et al. Changes in visceral adipose tissue mitochondrial content with type 2 diabetes and daily voluntary wheel running in OLETF rats. *J Physiol (Lond)* 2009;**587**:3729–39.
12. Laye MJ, Thyfault JP, Stump CS, et al. Inactivity induces increases in abdominal fat. *J Appl Physiol* 2007;**102**:1341–7.
13. Healy GN, Wijndaele K, Dunstan DW, et al. Objectively measured sedentary time, physical activity, and metabolic risk: the Australian Diabetes, Obesity and Lifestyle Study (AusDiab). *Diabetes Care* 2008;**31**:369–71.
14. Brown WJ, Miller YD, Miller R. Sitting time and work patterns as indicators of overweight and obesity in Australian adults. *Int J Obes Relat Metab Disord* 2003;**27**:1340–6.
15. Healy GN, Dunstan DW, Salmon J, et al. Breaks in sedentary time: beneficial associations with metabolic risk. *Diabetes Care* 2008;**31**:661–6.
16. McCrady SK, Levine JA. Sedentariness at work: how much do we really sit? *Obesity (Silver Spring)* 2009;**17**:2103–5.
17. Brownson RC, Boehmer TK, Luke DA. Declining rates of physical activity in the United States: what are the contributors? *Annu Rev Public Health* 2005;**26**:421–43.

For peer review only - <http://bmjopen.bmj.com/site/about/guidelines.xhtml>



## Original article

18. **Knuth AG**, Hallal PC. Temporal trends in physical activity: a systematic review. *J Phys Act Health* 2009;**6**:548–59.
19. **Conn VS**, Valentine JC, Cooper HM. Interventions to increase physical activity among aging adults: a meta-analysis. *Ann Behav Med* 2002;**24**:190–200.
20. **Dugdill L**, Brettle A, Hulme C, *et al*. Workplace physical activity interventions: a systematic review. *J Workplace Health Manage* 2008;**1**:20–40.
21. **Matson-Koffman DM**, Brownstein JN, Neiner JA, *et al*. A site-specific literature review of policy and environmental interventions that promote physical activity and nutrition for cardiovascular health: what works? *Am J Health Promot* 2005;**19**:167–93.
22. **Soler RE**, Leeks KD, Buchanan LR, *et al*. Point-of-decision prompts to increase stair use. A systematic review update. *Am J Prev Med* 2010;**38**(2 Suppl):S292–300.
23. **Fotheringham MJ**, Wonnacott RL, Owen N. Computer use and physical inactivity in young adults: public health perils and potentials of new information technologies. *Ann Behav Med* 2000;**22**:269–75.
24. **Chau JY**, der Ploeg HP, van Uffelen JG, *et al*. Are workplace interventions to reduce sitting effective? A systematic review. *Prev Med* 2010;**51**:352–6.
25. **Thompson WG**, Foster RC, Eide DS, *et al*. Feasibility of a walking workstation to increase daily walking. *Br J Sports Med* 2008;**42**:225–8.
26. **Levine JA**, Miller JM. The energy expenditure of using a 'walk-and-work' desk for office workers with obesity. *Br J Sports Med* 2007;**41**:558–61.
27. **McAlpine DA**, Manohar CU, McCrady SK, *et al*. An office-place stepping device to promote workplace physical activity. *Br J Sports Med* 2007;**41**:903–7.
28. **Blair SN**, Haskell WL, Ho P, *et al*. Assessment of habitual physical activity by a seven-day recall in a community survey and controlled experiments. *Am J Epidemiol* 1985;**122**:794–804.
29. American College of Sports Medicine. *ACSM's guidelines for exercise testing and prescription*. 7th edn. Lippincott Williams and Wilkins, 2006, Baltimore, MD.
30. **Borg G**. Ratings of perceived exertion and heart rates during short-term cycle exercise and their use in a new cycling strength test. *Int J Sports Med* 1982;**3**:153–8.
31. **Consolvo S**, Everitt K, Smith I, *et al*. *Designing for tangible interactions. Proceedings of Conference on Human Factors in Computing Systems*, April 24–27, 2006, Montréal, QC. doi: 10.1145/1124772.1124840.
32. **Wing RR**, Pinto AM, Crane MM, *et al*. A statewide intervention reduces BMI in adults: Shape Up Rhode Island results. *Obesity (Silver Spring)* 2009;**17**:991–5.

## Appendix 1 Feasibility questionnaire

|                                                                                                 | Strongly disagree | Disagree | Neutral | Agree | Strongly agree |
|-------------------------------------------------------------------------------------------------|-------------------|----------|---------|-------|----------------|
| 1. The pedal machine is easy to use                                                             |                   |          |         |       |                |
| 2. The pedal machine could be used in the typical office-style work environment                 |                   |          |         |       |                |
| 3. The pedal machine is too noisy                                                               |                   |          |         |       |                |
| 4. I would use the pedal machine as an alternative to be active on days that the weather is bad |                   |          |         |       |                |
| 5. I felt comfortable using the pedal machine in the presence of others at my work              |                   |          |         |       |                |
| 6. My work-related productivity decreased while using the pedal machine                         |                   |          |         |       |                |
| 7. The quality of my work decreased while using the pedal machine                               |                   |          |         |       |                |
| 8. The pedal machine interfered with my daily work-related tasks                                |                   |          |         |       |                |
| 9. I could conduct a normal, professional telephone conversation while using the pedal machine  |                   |          |         |       |                |
| 10. I could conduct normal computer-related tasks while using the pedal machine                 |                   |          |         |       |                |
| 11. I could read comfortably while using the pedal machine                                      |                   |          |         |       |                |
| 12. I was more tired on days I used the pedal machine                                           |                   |          |         |       |                |
| 13. I had more back pain on days I used the pedal machine                                       |                   |          |         |       |                |
| 14. I had more joint pain on days I used the pedal machine                                      |                   |          |         |       |                |
| 15. I had more muscle aches on days I used the pedal machine                                    |                   |          |         |       |                |
| 16. My physical activity increased while at work as a result of the pedal machine               |                   |          |         |       |                |
| 17. The time I spent being sedentary decreased while at work as a result of the pedal machine   |                   |          |         |       |                |
| 18. My physical activity increased outside of work as a result of the pedal machine             |                   |          |         |       |                |
| 19. If I were offered a pedal machine by my employer, I would use it while at work              |                   |          |         |       |                |
| 20. I would use the pedal machine while at home                                                 |                   |          |         |       |                |
| 21. The real-time monitor increased my use of the pedal machine                                 |                   |          |         |       |                |

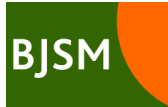

## Feasibility of a portable pedal exercise machine for reducing sedentary time in the workplace

Lucas J Carr, Kristen A Walaska and Bess H Marcus

*Br J Sports Med* published online February 14, 2011  
doi: 10.1136/bjasm.2010.079574

---

Updated information and services can be found at:  
<http://bjsm.bmj.com/content/early/2011/01/24/bjasm.2010.079574.full.html>

---

*These include:*

- |                               |                                                                                                                                                                                                                                                               |
|-------------------------------|---------------------------------------------------------------------------------------------------------------------------------------------------------------------------------------------------------------------------------------------------------------|
| <b>References</b>             | This article cites 30 articles, 11 of which can be accessed free at:<br><a href="http://bjsm.bmj.com/content/early/2011/01/24/bjasm.2010.079574.full.html#ref-list-1">http://bjsm.bmj.com/content/early/2011/01/24/bjasm.2010.079574.full.html#ref-list-1</a> |
| <b>P&lt;P</b>                 | Published online February 14, 2011 in advance of the print journal.                                                                                                                                                                                           |
| <b>Email alerting service</b> | Receive free email alerts when new articles cite this article. Sign up in the box at the top right corner of the online article.                                                                                                                              |
- 

### Notes

---

Advance online articles have been peer reviewed and accepted for publication but have not yet appeared in the paper journal (edited, typeset versions may be posted when available prior to final publication). Advance online articles are citable and establish publication priority; they are indexed by PubMed from initial publication. Citations to Advance online articles must include the digital object identifier (DOIs) and date of initial publication.

---

To request permissions go to:  
<http://group.bmj.com/group/rights-licensing/permissions>

To order reprints go to:  
<http://journals.bmj.com/cgi/reprintform>

To subscribe to BMJ go to:  
<http://group.bmj.com/subscribe/>



**Multicomponent Intervention to Reduce Daily Sedentary Time: A Randomized Controlled Trial**

|                                 |                                                                                                                                                                                                                                                                                                                                  |
|---------------------------------|----------------------------------------------------------------------------------------------------------------------------------------------------------------------------------------------------------------------------------------------------------------------------------------------------------------------------------|
| Journal:                        | <i>BMJ Open</i>                                                                                                                                                                                                                                                                                                                  |
| Manuscript ID:                  | bmjopen-2013-003261.R1                                                                                                                                                                                                                                                                                                           |
| Article Type:                   | Research                                                                                                                                                                                                                                                                                                                         |
| Date Submitted by the Author:   | 18-Jul-2013                                                                                                                                                                                                                                                                                                                      |
| Complete List of Authors:       | Carr, Lucas; University of Iowa, Health and Human Physiology<br>Karvinen, Kristina; Nipissing University, School of Physical and Health Education<br>Peavler, Mallory; East Carolina University, Kinesiology<br>Smith, Rebecca; East Carolina University, Kinesiology<br>Cangelosi, Kayla; East Carolina University, Kinesiology |
| <b>Primary Subject Heading</b>: | Public health                                                                                                                                                                                                                                                                                                                    |
| Secondary Subject Heading:      | Occupational and environmental medicine                                                                                                                                                                                                                                                                                          |
| Keywords:                       | sedentary, worksite, technology                                                                                                                                                                                                                                                                                                  |
|                                 |                                                                                                                                                                                                                                                                                                                                  |

SCHOLARONE™  
Manuscripts

1  
2 1 **Multicomponent Intervention to Reduce Daily Sedentary Time: A Randomized Controlled Trial**  
3

4 2  
5  
6 3 **Corresponding Author:**  
7

8 4 Lucas J. Carr, Ph.D.; University of Iowa; Department of Health and Human Physiology; Field House  
9 5 E118; Iowa City, IA 52242; Phone: (319)353-5432; Email: Lucas-Carr@uiowa.edu  
10  
11  
12 6

13  
14  
15 7 **Co-Authors:**  
16

17 8 Kristina Karvinen, Ph.D.; School of Physical and Health Education; Nipissing University; North Bay,  
18 9 Ontario, Canada  
19

20  
21 10 Mallory Peavler, M.S., Department of Kinesiology; East Carolina University; Greenville, NC, USA  
22

23 11 Rebecca Smith, M.S.; Department of Kinesiology; East Carolina University; Greenville, NC, USA  
24

25  
26 12 Kayla Cangelosi, M.S.; Department of Kinesiology; East Carolina University; Greenville, NC, USA  
27  
28 13

29  
30 14 **Word Count:**  
31

32 15 **Keywords:** sedentary, multicomponent, cardiometabolic  
33  
34  
35 16  
36  
37 17  
38  
39 18  
40  
41 19  
42  
43 20  
44  
45 21  
46  
47 22  
48  
49  
50 23  
51  
52 24  
53  
54 25  
55  
56 26  
57  
58 27  
59  
60

## ABSTRACT

**Background.** Excessive sedentary behavior has been estimated to be responsible for 9% of premature deaths worldwide. The purpose of this study was to test the efficacy of a multicomponent technology intervention for reducing daily sedentary time and improving cardiometabolic disease risk amongst sedentary, overweight university employees using a randomized controlled trial design.

**Methods.** Forty adults working in sedentary jobs were randomized to either: 1) an intervention group (N=23; 47.6±9.9 yrs; 94.1% female; 33.2±4.5 kg/m<sup>2</sup>); 2) or wait list control group (N=17; 42.6±8.9 yrs; 86.9% female; 31.7±4.9 kg/m<sup>2</sup>). The intervention group received a theory-based, internet-delivered program, a portable pedal machine at work and a pedometer for 12 weeks. Primary (sedentary and physical activity behavior measured objectively via StepWatch) and secondary (heart rate, blood pressure, height, weight, waist circumference, percent body fat, cardiorespiratory fitness, fasting lipids) outcomes were measured at baseline and post-intervention. Exploratory outcomes including intervention compliance and process evaluation measures were also assessed post-intervention.

**Results.** The intervention group reduced time spent sedentary (-57.8 minutes/day; p<0.01) and waist circumference (-1.0 cm; p=0.03) compared to the control group after adjusting for baseline values.

Intervention participants logged onto the website 71.3% of all intervention days, used the pedal machine 37.7% of all working intervention days, and pedaled an average of 31.1 minutes/day.

**Discussion.** These findings suggest the intervention was engaging and resulted in reductions in daily sedentary time amongst full-time sedentary employees. These findings hold public health significance due to the growing number of sedentary jobs and the potential of these technologies in large-scale worksite programs. ClinicalTrials.gov #NCT01371084

## Article focus

- The primary aim of this study was to test the effectiveness of a multicomponent intervention for reducing daily sedentary time and improving cardiometabolic risk factors amongst a sample of sedentary, overweight, full-time working adults compared to a waitlist control.

- 1  
2 54 • We hypothesized that the intervention group would significantly reduce daily sedentary time  
3  
4 55 and select cardiometabolic disease risk factors compared to the wait-list control group after 12  
5  
6 56 weeks.  
7  
8  
9 57 • As an exploratory aim, we conducted a process evaluation to explore intervention compliance  
10  
11 58 and identify helpful components of the intervention.  
12

### 13 59 **Key messages**

- 14  
15 60 • This multicomponent intervention resulted in significant reductions in time spent sedentary  
16  
17 61 and waist circumference when comparing the intervention group to the wait list control  
18  
19  
20 62 group.  
21  
22 63 • The present study builds upon past studies as our study was among the first to demonstrate  
23  
24 64 significant reductions in objectively measured sedentary time when compared to a control  
25  
26 65 group.  
27  
28  
29 66 • The findings of this study are important given the paucity of research in this area and  
30  
31 67 growing evidence demonstrating the importance of limiting daily sedentary time for  
32  
33 68 reducing risk of chronic diseases.  
34

### 35 69 **Strengths**

- 36  
37  
38 70 • Primary strengths of this study include: 1) among the first RCT's to target sedentary time as a  
39  
40 71 primary outcome; 2) among the first RCT's to use an objective measure of sedentary time; 3)  
41  
42 72 conducted a 12 week trial which extends previous sedentary interventions that have typically  
43  
44 73 been of brief durations; 4) measured cardiometabolic risk factors; and 5) conducted a process  
45  
46 74 evaluation to identify features of the intervention that worked particularly well.  
47

### 48 75 **Limitations**

- 49  
50  
51 76 • Primary limitations of this study include: 1) small sample size (N=40) comprised primarily of  
52  
53 77 middle-aged females working at a single institution which limits generalizability; and 2)  
54  
55 78 differential drop out, although follow-up analyses indicate no differences between those that  
56  
57  
58  
59  
60

1  
2 79 dropped and those that completed for age (P=0.48), BMI (P=0.63), or daily sedentary time  
3  
4 80 (P=0.32).  
5  
6 81  
7  
8 82  
9

## 10 83 INTRODUCTION

13 84 Excessive time spent in sedentary behavior is an independent risk factor for multiple chronic  
14  
15 85 health outcomes including cardiovascular disease,[1 2] type 2 diabetes,[3] hypertension,[4] metabolic  
16  
17 86 syndrome[5] and obesity.[6] Conversely, recent acute experimental studies suggest interrupting  
18  
19 87 and/or replacing excessive sedentary behavior with light intensity physical activity throughout the day  
20  
21 88 may be effective for improving various cardiometabolic disease risk factors .[7 8]The modern  
22  
23 89 workplace has been identified as a setting in which individuals engage in prolonged bouts of  
24  
25 90 sedentary time [9]. Adults working in full-time sedentary jobs are at particular risk for being sedentary  
26  
27 91 as they often spend more than 75% of work time sitting[9-11].Currently, more than 27% of the U.S.  
28  
29 92 labor force works in low-activity occupations.[12] The observed decline in occupational energy  
30  
31 93 expenditure (~100 kcals/day) over the past 50 years has been identified as a key contributor to the  
32  
33 94 observed increase in mean body mass amongst U.S. adults over the same time period.[13]  
34  
35 95 Traditional behaviorally focused worksite interventions have focused primarily on increasing physical  
36  
37 96 activity and have resulted in modest effect sizes (Cohen's  $d = 0.21-0.22$ ).[14 15] In a shift away from  
38  
39 97 behaviorally focused approaches, studies grounded in social ecological theory[16] have begun testing  
40  
41 98 the effect of modifying the work environment to reduce occupational sedentary time.  
42  
43  
44

45 99 To date, only a handful of sedentary interventions have been conducted in the worksite. While  
46  
47 100 many early worksite sedentary interventions did not demonstrate effectiveness [17], more recent trials  
48  
49 101 have shown promise for reducing sitting time [18-20]. Overall, many sedentary interventions studies  
50  
51 102 conducted in the worksite have been limited by the use of self-report measures of sedentary time  
52  
53 103 and/or short duration interventions (1-4 weeks). Further, most studies in this area have promoted  
54  
55 104 reduced 'sitting time'. Given the recent availability of seated activity permissive workstations [10] and  
56  
57 105 the possible desire/need of many employers and employees to remain seated while completing their  
58  
59  
60

1  
2 106 work, there is a need for interventions that promote 'active sitting' as opposed to 'reduced sitting' as a  
3  
4 107 means for reducing sedentary time.

5  
6 108 In a previous study testing the feasibility of modifying the work environment as a means of  
7  
8 109 reducing occupational sedentary time through promoting active sitting, our team provided portable  
9  
10 110 pedal machines (MagneTrainer, 3D Innovations) to 18 sedentary desk workers for four weeks [10].  
11  
12 111 Importantly, participants rated the pedal machines as feasible and acceptable for use while  
13  
14 112 completing their work. Further, despite a lack of any accompanying behavioral intervention,  
15  
16 113 participants used the pedal machines on 61% of all work days for an average of 23.4 minutes per  
17  
18 114 day. Although these results are promising, it is possible the addition of a motivational behavioral  
19  
20 115 intervention could result in increased pedaling compliance and reduced sedentary time.  
21  
22

23  
24 116 The primary aim of the present study was to test the effectiveness of a multicomponent  
25  
26 117 intervention for reducing daily sedentary time and improving cardiometabolic risk factors amongst a  
27  
28 118 sample of sedentary, overweight, full-time working adults compared to a wait-list control group. We  
29  
30 119 hypothesized that the intervention group would significantly reduce daily sedentary time and select  
31  
32 120 cardiometabolic disease risk factors compared to the wait-list control group after 12 weeks. As an  
33  
34 121 exploratory aim, we conducted a process evaluation to explore intervention compliance and identify  
35  
36 122 helpful components of the intervention.  
37  
38

## 39 123

## 40 124 **METHODS**

### 41 125 **Subjects and Design**

42  
43  
44  
45 126  
46  
47

48 127 Many sedentary interventions to date have been limited by short durations. Therefore, we  
49  
50 128 conducted a 12 week randomized controlled trial design comparing a treatment group to a no  
51  
52 129 treatment wait-list control group. We recruited apparently healthy but sedentary (self-reporting less  
53  
54 130 than 60 minutes of moderate-to-vigorous intensity physical activity per week), overweight (body mass  
55  
56 131 index (BMI)  $\geq 25.0$  kg/m<sup>2</sup>) adults working in full-time (reporting minimum of 35.0+ hours/week)  
57  
58 132 sedentary/desk-dependent occupations (reporting minimum of 75% of working time spent sitting).  
59  
60



1  
2 133 Participants were required to gain permission from their supervisor prior to enrollment. Research staff  
3  
4 134 members screened participants for eligibility by telephone. Exclusionary criteria included: 1)  
5  
6 135 limitations with or contraindications to ambulatory exercise; 2) acute illness or injury; 3) cognitive  
7  
8 136 impairment, psychosis, or other diagnosed psychological illness (with the exception of depression and  
9  
10 137 anxiety); 4) currently using psychotropic drugs; or 5) diagnosis of a chronic condition such as heart  
11  
12 138 failure or cancer. Participants were not compensated for participation in the study. Experimental  
13  
14 139 protocols were approved by the University and Medical Center Institutional Review Board and  
15  
16 140 voluntary written informed consent was obtained from each participant.  
17  
18

19  
20 141 Participants of all races and ethnic backgrounds working at a large southern university were  
21  
22 142 passively recruited through email advertisements placed on an electronic mailing list serve that  
23  
24 143 served 5,392 employees. A total of 192 people responded to our advertisements of which 143 were  
25  
26 144 excluded from participation due to: not meeting eligibility criteria which primarily consisted of not  
27  
28 145 meeting BMI and/or physical activity requirements (N=120); declined to participate (N=19); or other  
29  
30 146 reasons (N=4). A 1:1 random allocation sequence was generated by the principal investigator using  
31  
32 147 an online random sequence generator.[21] Participants were assigned to one of two groups by a  
33  
34 148 research staff member not involved in data collection based on the order in which they enrolled into  
35  
36 149 the study. A total of 49 participants deemed interested and eligible for participation were randomized  
37  
38 150 to one of two groups: 1) intervention (N=25); 2) wait-list control (N=24). Of the 49 enrolled, 40  
39  
40 151 participants completed all baseline and post-intervention assessments. Nine participants were lost to  
41  
42 152 follow-up (see Figure 1). Final analyses were completed on 40 participants with 23 intervention  
43  
44 153 participants and 17 control participants (see Table 1). More than half of all participants were college  
45  
46 154 educated, reported an annual income greater than \$40,000 and reported being non-Hispanic/White.  
47  
48 155 Participants were enrolled and completed all testing sessions between June 2011 and June 2012.  
49  
50  
51

52 156  
53  
54 157 [Figure 1 here]  
55  
56 158

## 57 58 159 **Group Descriptions** 59 60

1  
2 160  
3  
4 161  
5  
6 162  
7  
8 163  
9  
10 164  
11  
12 165  
13  
14  
15 166  
16  
17 167  
18  
19 168  
20  
21 169  
22  
23 170  
24  
25 171  
26  
27 172  
28  
29 173  
30  
31 174  
32  
33 175  
34  
35 176  
36  
37 177  
38  
39 178  
40  
41 179  
42  
43 180  
44  
45 181  
46  
47 182  
48  
49 183  
50  
51 184  
52  
53 185  
54  
55 186  
56  
57  
58  
59  
60

### *Wait List Control Group*

Participants randomized to the wait-list control group were asked to maintain their current behaviors for 12 weeks at which time they were given the option to receive the intervention treatment materials.

### *Intervention Group*

The primary intent of the intervention was to encourage participants to reduce their time spent sedentary. The name used to promote the study on advertisements and study materials was “*Pedal@Work: Reducing time spent sedentary...*”. The intervention (Figure 2) comprised of three primary components: 1) access to a portable pedal machine (MagneTrainer, 3D Innovations, Greeley, CO) at their worksite; 2) access to a motivational website (Walker Tracker, Portland, OR) to receive tips and reminders focused on reducing sedentary behaviors throughout the day; and 3) a pedometer to use in conjunction with the website (Omron HJ-150). The pedal machine is a portable (18” height, 20” length) device that has been demonstrated as acceptable for use during sedentary office work [10]. Because participants were sedentary employees working in professional environments, the rationale for providing them pedal machines at work was to allow them to engage in light intensity activity (i.e. active sitting) that they could perform for long periods throughout the day without causing them to perspire. The pedal machine is accompanied by a PC interface and software package that allows for objective monitoring of individual pedal activity. This software also provides the user with real-time feedback via a display monitor on pedal time, distance, speed and caloric expenditure. The research team delivered the pedal machine to each participant’s worksite, downloaded the pedal tracking software to the participant’s work computer, and worked with the participant to identify the most feasible set up. Intervention participants were asked to keep the pedal machine connected to their PC during all working hours. Intervention participants were required to gain clearance to use the pedal machines and software at their work prior to participation. No additional interaction between the research staff and participant’s supervisors occurred during the course of the study. Participants were

1  
2 187 located in 18 different buildings across campus. No participants worked within visible proximity of  
3  
4 188 each other.

5  
6 189 Intervention participants were also provided access to a motivational website that was  
7  
8  
9 190 individually customized to the local culture of the worksite of which participants were recruited (Figure  
10  
11 191 2). Examples of customization included posting local images and messages specific to the local  
12  
13 192 institution. The content of the intervention focused primarily on reducing time spent sedentary (both  
14  
15 193 increasing active sitting via pedaling and taking breaks from sitting). Example messages included  
16  
17 194 "Let's try to pedal an extra five minutes during your lunch break today" and "Did you know standing up  
18  
19 195 burns more calories than sitting? Maybe it's time for a break!?" Most messages targeted time spent at  
20  
21 196 work although some messages broadly targeted sedentary time in general and could have impacted  
22  
23  
24 197 sedentary time outside of work. Messages were theory based targeting constructs of the Social  
25  
26 198 Cognitive Theory[22] including self-monitoring, social support, self-efficacy, and perceived  
27  
28 199 environment. For example, participants were prompted via daily email messages to self-monitor their  
29  
30 200 daily pedal time and daily steps (via pedometer) on the website. The activity participants logged on  
31  
32 201 the website was used to fuel a virtual competition (aimed at building social support) in which small  
33  
34 202 groups of intervention participants (4-5 per group) collectively traveled across America. Participants  
35  
36 203 were also emailed three theory-based motivational messages each week targeting goal setting, self-  
37  
38 204 efficacy, and perceived environment. Specific goals were not set for intervention participants, rather  
39  
40 205 participants received advice on how to set goals and suggestions for daily pedaling time (e.g. "Try  
41  
42 206 fitting in 10 minutes of pedaling during your lunch today.") Finally, using a forum similar to Facebook,  
43  
44 207 participants were able to post profile photos and status updates on a newsfeed and send messages  
45  
46 208 to members of their small groups further fostering social support.  
47  
48  
49

50 209  
51  
52 210 [Figure 2 here]  
53

54 211  
55  
56 212 **Measures**  
57  
58  
59  
60

1  
2 213 All measures were collected at baseline and post-intervention (12 weeks) in a controlled  
3  
4 214 laboratory setting by two staff members blinded to participant's group assignment. The two staff  
5  
6 215 members were provided specific measurement duties to ensure each measure was collected by the  
7  
8 216 same staff member at both baseline and post-intervention. The primary outcome was daily sedentary  
9  
10 217 time as measured objectively by the StepWatch physical activity monitor (Orthocare Innovations,  
11  
12 218 Mountlake Terrace, Wash, USA). The StepWatch was specifically chosen for this study as it is worn  
13  
14 219 on the ankle making it ideally suited to measure both pedaling and walking behavior. Further, the  
15  
16 220 StepWatch has been demonstrated as a reliable measure of walking behavior (3 day agreements for  
17  
18 221 steps per day (39.1%) and percent inactive time ( 9.52%)) [23] and an accurate measure of both  
19  
20 222 sedentary behaviors (89.8-99.5% accurate) and light intensity walking (86.1% accurate)[24]. The  
21  
22 223 StepWatch has demonstrated superior ability for detecting pedaling time (23.5-54.4% accurate) when  
23  
24 224 compared to hip worn accelerometers (8.1-47.1% correct).[25] Participants were asked to wear the  
25  
26 225 monitor during all wakeful hours for seven consecutive days and keep track of wear time using an  
27  
28 226 activity log. Days in which participants wore the monitors for less than 10 hours were excluded from  
29  
30 227 final analysis. Intervention participants wore the StepWatch monitor an average of 5.7 of 7.0 (81.0%)  
31  
32 228 days for 14.5 hours/day while control participants wore the monitor an average of 5.5 days (78.6%) for  
33  
34 229 13.8 hours/day. The threshold for sedentary (0 steps/min) was based on the recommendation  
35  
36 230 provided by the product manufacturer. The thresholds for light (1–45 steps/min), moderate- (46-75  
37  
38 231 steps/min) and vigorous (76+ steps/min) intensity physical activities were based on previous work  
39  
40 232 which demonstrated moderate-intensity walking stride rate to range from 90–113 steps/minute  
41  
42 233 depending on height and stride length[26].

43  
44 234 Blood pressure was measured with a stethoscope and sphygmomanometer using standard  
45  
46 235 techniques. Heart rate was monitored with a Polar™ heart rate monitor and chest strap. Body mass  
47  
48 236 was measured to the nearest 0.1 kg and height to the nearest 0.5 cm using a professional grade  
49  
50 237 digital medical scale and height rod (Seca 769, Hanover,MD). Waist circumference was measured in  
51  
52 238 duplicate with a standard Gulick measuring tape according to standard procedures.[27] Fasting blood  
53  
54 239 lipids (total cholesterol, LDL cholesterol, HDL cholesterol, and triglycerides) were assessed via finger  
55  
56  
57  
58  
59  
60

1  
2 240 stick and using a point-of-care analyzer (Cholestech LDX analyzer) that has previously been  
3  
4 241 demonstrated as an accurate and precise measure of total cholesterol (1.6% and 3.0% respectively),  
5  
6 242 HDL-cholesterol (-2.74% and 1.05% respectively) and triglycerides (2.11% and 2.65%  
7  
8 243 respectively).[28] Estimated aerobic fitness was assessed via a single-stage submaximal treadmill  
9  
10 244 walking test which had been previously demonstrated as a valid estimate of total aerobic fitness  
11  
12 245 amongst middle-aged adults.[29]  
13  
14

15 246 Compliance with the pedal machine (i.e., minutes pedaled/day, total days pedaled) was  
16  
17 247 assessed objectively via the activity tracking software. Pedal compliance data was downloaded  
18  
19 248 directly from each individual's work computer at the end of 12 weeks. Website use compliance (e.g.,  
20  
21 249 number of website logins, number of steps logged on the website) was assessed objectively at the  
22  
23 250 end of 12 weeks via a backend tracking database made available by the website administrators. In  
24  
25 251 order to assess which components of the intervention participants 'perceived' as helpful for reducing  
26  
27 252 their sedentary time, a process evaluation survey was conducted at 12 weeks amongst intervention  
28  
29 253 completers. Participants rated each intervention component using a five point Likert scale.  
30  
31  
32 254

### 34 255 **Design/Statistical Analysis**

36  
37 256 A sample size of 40 (recruiting 49 assuming 20% attrition) was necessary to detect, with 80%  
38  
39 257 power, at  $\alpha=0.05$ , a 30 minute/day difference in daily sedentary time. The 30 minute/day difference  
40  
41 258 was identified as a reasonable estimate based on our previous study in which participants used the  
42  
43 259 same pedal machines an average of 23 minutes/day without any motivational intervention.[10] Means  
44  
45 260 (SD) were used to describe data where appropriate.

47 261 The paired samples t-test was used to determine any within group differences at baseline and  
48  
49 262 post-intervention. Analysis of covariance (ANCOVA) was used to test for differences between groups  
50  
51 263 at post-intervention. Baseline values of interest were included as covariates in the model for all  
52  
53 264 continuous variables consistent with recommended statistical procedures [30]. The underlying  
54  
55 265 assumption no between group differences at baseline was confirmed for all measures by one way  
56  
57  
58  
59  
60

ANOVA. Finally, the 95% confidence interval (CI) for the mean differences of all primary and secondary outcomes of interest are presented.

## RESULTS

Baseline characteristics of both groups are presented in Table 1. Overall, participants were middle-aged and mostly classified as obese. More than half of all participants were college educated, reported an annual income greater than \$40,000 and reported being non-Hispanic/White. Differential drop out was observed over the course of the study, although sensitivity analyses indicate no differences between those that dropped and those that completed the study for measures of age (P=0.48), BMI (P=0.63), or daily sedentary time (P=0.32).

**Table 1.** Baseline characteristics by group Mean  $\pm$  S.D. (N=40)

|                        | Control Group | Intervention Group | All         |
|------------------------|---------------|--------------------|-------------|
|                        | N=17          | N=23               | (N=40)      |
| Age (years)            | 47.6(9.9)     | 42.6(8.9)          | 44.7(9.6)   |
| Female %               | 94.1%         | 86.9%              | 90%         |
| Height (in)            | 65.2(3.2)     | 65.4(3.4)          | 65.4(3.4)   |
| Weight (lbs)           | 201.3(30.2)   | 194.1(34.9)        | 197.2(32.8) |
| Body Mass Index (BMI)  | 33.2(4.5)     | 31.7(4.9)          | 32.4(4.8)   |
| Non-Hispanic White (%) | 76.5%         | 63.6%              | 70.0%       |
| College Graduate (%)   | 71.0%         | 86.0%              | 78.5%       |
| Income >\$40,000 (%)   | 62.5%         | 63.6%              | 63.0%       |

Table 2 illustrates changes in the primary outcomes of sedentary and physical activity behaviors for both groups. No differences were observed for any of these measures at baseline. A significant intervention effect favoring the intervention group (95% CI, -0.99, 118.4 minutes/day) was observed for absolute number of daily sedentary minutes after adjusting for baseline values.

Intervention effects reached near significance for both percent daily time spent sedentary (95% CI, -6.8%, -0.6%) and percent time spent in moderate intensity physical activity (95% CI, 0.0, 2.6%) (see Table 2).

**Table 2.** Absolute and relative time spent in sedentary and physical activity behaviors at baseline and post-intervention for Control (N=17) and Intervention (N=23) participants. Data presented as Mean(SD).

|                          | Baseline     | Post-Intervention | Mean Difference <sup>a</sup><br>(95% CI) | Within Group<br>P value | Between Group P value<br>(Post) |
|--------------------------|--------------|-------------------|------------------------------------------|-------------------------|---------------------------------|
| <b>Minutes Sedentary</b> |              |                   |                                          |                         | <0.01**                         |
| Control                  | 544.2(76.9)  | 599.7(106.6)      | +55.5 (2.8, 108.1)                       | 0.04*                   |                                 |
| Intervention             | 584.9(136.1) | 526.1(77.3)       | -58.7 (-118.4, 0.99)                     | 0.04*                   |                                 |
| <b>% Time Sedentary</b>  |              |                   |                                          |                         | 0.06                            |
| Control                  | 65.7(7.5)    | 67.5(8.0)         | -1.8% (-2.7%, 6.3%)                      | 0.41                    |                                 |
| Intervention             | 67.6(7.2)    | 63.9(7.9)         | -3.7% (-6.8%, -0.6%)                     | 0.02*                   |                                 |
| <b>Minutes Light</b>     |              |                   |                                          |                         | 0.64                            |
| Control                  | 265.7(84.0)  | 262.2(70.8)       | -3.5 (-45.6, 38.6)                       | 0.86                    |                                 |
| Intervention             | 263.9(69.5)  | 270.3(69.5)       | +6.4 (-18.7, 31.5)                       | 0.6                     |                                 |
| <b>% Time Light</b>      |              |                   |                                          |                         | 0.16                            |
| Control                  | 31.9(8.1)    | 30.3(8.4)         | -1.6% (-6.0%, 2.8%)                      | 0.46                    |                                 |
| Intervention             | 30.6(8.2)    | 32.7(7.6)         | 2.1% (-0.8%, 4.9%)                       | 0.15                    |                                 |
| <b>Minutes Moderate</b>  |              |                   |                                          |                         | 0.13                            |
| Control                  | 18.6(25.2)   | 17.4(23.7)        | -1.2 (-4.9, 2.4)                         | 0.5                     |                                 |
| Intervention             | 14.5(18.5)   | 23.3(28.0)        | +8.8 (-1.6, 19.2)                        | 0.09                    |                                 |
| <b>% Time Moderate</b>   |              |                   |                                          |                         | 0.06                            |
| Control                  | 2.3(3.2)     | 2.0(2.9)          | -0.3% (-0.7%, 0.2%)                      | 0.21                    |                                 |
| Intervention             | 1.5(1.5)     | 2.8(3.4)          | +1.3% (0.0%, 2.6%)                       | 0.04*                   |                                 |
| <b>Minutes Vigorous</b>  |              |                   |                                          |                         | 0.33                            |
| Control                  | 1.2(2.6)     | 1.5(2.7)          | +0.4 (-0.2, 0.9)                         | 0.19                    |                                 |
| Intervention             | 2.7(6.4)     | 4.9(10.9)         | +2.2 (-2.7, 7.0)                         | 0.37                    |                                 |
| <b>% Time Vigorous</b>   |              |                   |                                          |                         | 0.25                            |
| Control                  | 0.1(0.3)     | 0.2(0.3)          | 0.0% (0.0%, 0.1%)                        | 0.32                    |                                 |
| Intervention             | 0.3(0.6)     | 0.6(1.3)          | +0.3% (-0.3, 0.9%)                       | 0.26                    |                                 |

<sup>a</sup> Mean change from baseline (95% confidence interval), adjusted for baseline value (ANCOVA)

\* p < 0.05 for within group change from baseline (paired t-test)

\*\* p < 0.05 for between group differences at post-intervention (ANCOVA)

Table 3 illustrates changes in the secondary outcomes of cardiometabolic risk factors for both groups. A significant intervention effect was observed for waist circumference  $p=0.03$  after adjusting for baseline values (Table 3). No significant intervention effects were observed for any other cardiometabolic risk factors.

**Table 3.** Cardiometabolic risk factors at baseline and post-intervention for Control (N=17) and Intervention (N=23) participants. Data presented as Mean(SD).

|                                             | Baseline    | Post-Intervention | Mean Difference <sup>a</sup><br>(95% CI) | Within Group<br>P value | Between<br>Group P value<br>(Post) |
|---------------------------------------------|-------------|-------------------|------------------------------------------|-------------------------|------------------------------------|
| <b>Weight (lbs)</b>                         |             |                   |                                          |                         | 0.58                               |
| Control                                     | 201.4(30.2) | 202.4(30.5)       | +1.0 (-1.0, 3.0)                         | 0.31                    |                                    |
| Intervention                                | 194.2(34.9) | 194.4(34.5)       | +0.2 (-2.3, 2.7)                         | 0.86                    |                                    |
| <b>BMI (kg/m<sup>2</sup>)</b>               |             |                   |                                          |                         | 0.76                               |
| Control                                     | 33.2(4.5)   | 33.4(4.6)         | +0.2 (-0.1, 0.5)                         | 0.21                    |                                    |
| Intervention                                | 31.8(5.0)   | 31.9(5.0)         | -0.1 (-0.3, 0.5)                         | 0.57                    |                                    |
| <b>Systolic BP (mmHg)</b>                   |             |                   |                                          |                         | 0.70                               |
| Control                                     | 117.1(13.0) | 117.5(12.8)       | -0.8 (-5.0, 3.6)                         | 0.71                    |                                    |
| Intervention                                | 120.0(13.8) | 115.7(10.8)       | -4.3 (-8.0, -0.7)                        | 0.02*                   |                                    |
| <b>Diastolic BP (mmHg)</b>                  |             |                   |                                          |                         | 0.51                               |
| Control                                     | 72.8(10.3)  | 73.2(10.6)        | -0.1 (-5.0, 4.8)                         | 0.96                    |                                    |
| Intervention                                | 78.2(10.3)  | 75.4(7.4)         | -2.8 (-6.2, 0.7)                         | 0.11                    |                                    |
| <b>Waist Circumference (cm)</b>             |             |                   |                                          |                         | 0.03**                             |
| Control                                     | 92.9(11.1)  | 93.9(10.8)        | +1.0 (-0.7, 2.7)                         | 0.22                    |                                    |
| Intervention                                | 92.6(11.2)  | 91.6(11.3)        | -1.0 (-2.1, 0.3)                         | 0.06                    |                                    |
| <b>Estimated V<sub>O2</sub> (ml/kg/min)</b> |             |                   |                                          |                         | 0.10                               |
| Control                                     | 29.6(2.5)   | 30.0(2.6)         | +0.3 (-0.1, 0.8)                         | 0.14                    |                                    |
| Intervention                                | 30.8(5.1)   | 31.1(4.6)         | +0.3 (-0.6, 1.1)                         | 0.53                    |                                    |
| <b>Total Cholesterol (mg/dL)</b>            |             |                   |                                          |                         | 0.83                               |
| Control                                     | 184.4(25.9) | 185.0(18.9)       | -0.8 (-15.1, 13.4)                       | 0.91                    |                                    |
| Intervention                                | 191.4(26.3) | 189.7(27.0)       | +0.7 (-5.9, 7.2)                         | 0.83                    |                                    |
| <b>HDL (mg/dL)</b>                          |             |                   |                                          |                         | 0.65                               |
| Control                                     | 47.6(18.4)  | 46.7(18.9)        | -0.9 (-6.8, 5.1)                         | 0.76                    |                                    |
| Intervention                                | 45.7(17.6)  | 43.7(16.4)        | -2.1 (-8.1, 3.4)                         | 0.46                    |                                    |
| <b>LDL (mg/dL)</b>                          |             |                   |                                          |                         | 0.96                               |
| Control                                     | 111.2(32.1) | 120.2(25.3)       | +5.4 (-11.3, 22.1)                       | 0.50                    |                                    |
| Intervention                                | 119.4(23.2) | 116.7(29.4)       | -3.7 (-12.8, 5.4)                        | 0.41                    |                                    |
| <b>Triglycerides</b>                        |             |                   |                                          |                         | 0.91                               |
| Control                                     | 130.6(65.4) | 131.0(59.9)       | +4.7 (-24.0, 33.3)                       | 0.73                    |                                    |
| Intervention                                | 98.4(45.2)  | 118.4(57.3)       | +18.3 (-0.1, 36.7)                       | 0.05                    |                                    |



<sup>a</sup> Mean change from baseline (95% confidence interval), adjusted for baseline value (ANCOVA)

\*  $p < 0.05$  for within group change from baseline (paired t-test)

\*\*  $p < 0.05$  for between group differences at post-intervention (ANCOVA)

A total of 23 participants completed the intervention and provided compliance data (see Table 4). Intervention participants logged on to the website an average of 71.3% (59.8 days) of all days they had access to the website (including weekends) (Table 4). Intervention participants also logged an average of  $7945 \pm 4634$  steps per day on the website over the 12 weeks. Participants pedaled an average of 37.7% (22.6 days) of all days they had access to the pedal machine (excluding weekends). Participants pedaled an average of  $31.1 \pm 31.6$  minutes per day on the days they used the pedal machines and for an average of  $16.1 \pm 17.2$  minutes per pedaling bout

**Table 4.** Intervention compliance measures amongst Intervention completers (N=23).

|                                                    | Mean/% | S.D. |
|----------------------------------------------------|--------|------|
| Web Compliance % (Days Logged in/Days with Access) | 71.3   | 35.7 |
| Average Steps Logged Per Day                       | 7945   | 4634 |
| Average Days Pedaled Over 12 Weeks                 | 22.6   | 17.6 |
| Pedal Compliance % (Days Pedaled/Days with Access) | 37.7   | 29.3 |
| Average Pedal Bouts/Day                            | 1.9    | 0.9  |
| Average Minutes Pedaled/Day Used                   | 31.1   | 31.6 |
| Average Minutes Pedaled/Pedal Bout                 | 16.1   | 17.2 |

When asked to rate the helpfulness of each intervention feature for reducing their sedentary time, participants rated the pedal machine biofeedback display, the pedometer, self-monitoring activity on the website as “extremely helpful” (median Likert score = 5.0; Table 5). Participants rated the email

reminders to log daily activity and access to the pedal machine as “quite helpful” (median Likert score = 4.0; Table 5).

**Table 5** : Quartile and median Likert scale responses (1=Not at all helpful; 2=A little helpful; 3=moderately helpful; 4=Quite helpful; 5=Extremely helpful) on helpfulness of individual intervention components for reducing sedentary time (N=23).

| Please rate how helpful each of the following intervention components was in reducing your daily sedentary time. | Likert Scale |        |     |
|------------------------------------------------------------------------------------------------------------------|--------------|--------|-----|
|                                                                                                                  | Q1           | Median | Q3  |
| Pedal machine biofeedback display (minutes pedaled, calories burned, etc.)                                       | 4.0          | 5.0    | 5.0 |
| Wearing the pedometer                                                                                            | 4.0          | 5.0    | 5.0 |
| Self-monitoring daily steps and pedal time on the website                                                        | 4.0          | 5.0    | 5.0 |
| Email reminders to log physical activity on website                                                              | 4.0          | 4.0    | 5.0 |
| Access to pedal exercise machine at work                                                                         | 4.0          | 4.0    | 5.0 |
| 'Walk Across America' Group Challenge on website                                                                 | 3.0          | 3.0    | 5.0 |
| Social networking features on website (profile, newsfeed, messaging)                                             | 3.0          | 3.0    | 4.0 |
| Environmental features (Walkscore, information on facilities)                                                    | 3.0          | 3.0    | 3.8 |

## DISCUSSION

The primary findings of this study suggest that this multicomponent intervention resulted in significant time spent sedentary in a small sample of inactive, overweight employees. The decreased sedentary time observed among the intervention group appears to be have been at least partially replaced by an increase in moderate intensity activity. Our findings are important as the present study was among the first worksite interventions to promote ‘active sitting’ as a means of reducing sedentary time. Further, the present study was conducted over a longer duration (12 weeks) compared to similar trials [19 31] and utilized an objective measure of sedentary/physical activity

1  
2 330 behavior whereas many previous interventions have relied upon self-report measures of sedentary  
3  
4 331 time[17]. The present study builds upon past studies as our study was among the first to demonstrate  
5  
6 332 significant reductions in objectively measured sedentary time when compared to a control group. This  
7  
8 333 is important, as it has been suggested that decreasing sedentary time can result in improved health  
9  
10 334 benefits independent of physical activity.[2 32-34]

13 335 Sedentary time amongst the intervention group was reduced by an average of 58 minutes/day  
14  
15 336 or 3.7% of daily time. Our findings are within the range of similar studies. For example, Kozy-Keadle  
16  
17 337 et al. found daily sedentary time reduced from 67.0% to 62.7% after a simple, seven day intervention  
18  
19 338 that included educational materials on sedentary health risks and tips to reduce sedentary time.[31]  
20  
21 339 However, this study did not include a control group. In a study that did include a control group, Evans  
22  
23 340 et al. found no between group differences in objectively measured sitting time after five days of point-  
24  
25 341 of-choice software reminders to stand up every 30 minutes while at work.[19]

28 342 We also observed a significant intervention effect for waist circumference. This finding is  
29  
30 343 important as waist circumference has been shown to predict mortality amongst adults with coronary  
31  
32 344 artery disease.[35] Confidence in this finding is strengthened by past studies that have found waist  
33  
34 345 circumference to be sensitive to change in the absence of changes in other measures of adiposity[36]  
35  
36 346 as well as studies reporting interruptions from sedentary time to be associated with waist  
37  
38 347 circumference.[37] Furthermore, this finding is consistent with findings of a previous 16-week internet-  
39  
40 348 delivered physical activity program which demonstrated modest improvements in daily steps and  
41  
42 349 waist circumference.[36] The lack of changes in other cardiometabolic risk factors may be due to the  
43  
44 350 low intensity of the intervention as well as the limited duration of 12 weeks. Studies of longer duration  
45  
46 351 are needed to determine whether long-term reduction in sedentary time results in cardiometabolic risk  
47  
48 352 reduction.

52 353 Participant compliance to the website overall was high with participants logging into the  
53  
54 354 website an average of 71% of all intervention days. This is important as past internet-delivered  
55  
56 355 intervention studies have identified engagement to be a challenge [38 39] and a predictor of  
57  
58 356 intervention success.[40] By comparison, Lewis et al. reported participants logged on to a physical  
59  
60

1  
2 357 activity website a median number of 50 times (13.7%) over 12 months.[41] Reasons for such high  
3  
4 358 website compliance in the present study may be due to the tailoring of the website to include locally  
5  
6 359 relevant images and messages and/or the regular email messages.  
7

8  
9 360 Participant compliance with the pedal machines in the present 12 week trial (31 minutes/day)  
10  
11 361 was higher when compared to compliance in our previous four week trial (23 minutes/day).[10] These  
12  
13 362 findings suggest the added motivational intervention, which included suggestions for setting goals and  
14  
15 363 finding time to pedal each day, resulted in improved daily compliance that was sustained over a  
16  
17 364 longer duration. Despite the logistical limitation of the portable pedal machine when paired with  
18  
19 365 standard height desks (i.e., many participants reported their knees hit the underside of their desk  
20  
21 366 while pedaling), participants used the pedal machine on a fairly regular basis. In order to maximize  
22  
23 367 compliance with such portable pedal machines in future studies, it is recommended these devices be  
24  
25  
26 368 paired with height adjustable desks that allow for comfortable pedaling during computer work tasks.  
27

28 369 Intervention participants reported features that provided feedback including the pedal machine  
29  
30 370 tracking software, pedometers and self-monitoring daily activity on the website (which was  
31  
32 371 immediately followed by a graph illustrating the individual's daily progress) as the most helpful  
33  
34 372 features for reducing their daily sedentary time. This information is important and could be used to  
35  
36 373 inform future interventions aimed at reducing sedentary behavior. This finding is consistent with past  
37  
38 374 studies which have found biofeedback as a useful tool to improve health behaviors.[42 43]  
39  
40

41 375 The main limitation of the study was the limited generalizability due to a small sample size that  
42  
43 376 comprised primarily of middle-aged females working at a single institution. We also experienced  
44  
45 377 differential drop out, although follow-up analyses indicate no differences between those that dropped  
46  
47 378 and those that completed for age, BMI, or daily sedentary time.  
48  
49

50 379 The present study is among the first interventions conducted within the worksite aimed  
51  
52 380 specifically at reducing daily sedentary time to demonstrate between group differences in objectively  
53  
54 381 measured sedentary time. Compliance with the motivational website was high while compliance with  
55  
56 382 the pedal machine was moderate. These findings are promising considering the relatively low cost of  
57  
58 383 the intervention which cost a total of \$180 (pedal machine and software, pedometer, access to  
59  
60

1  
2 384 website) per participant. While an intervention effect was observed for waist circumference, no  
3  
4 385 between group differences were observed for any other cardiometabolic risk factors. More sedentary  
5  
6 386 focused interventions are needed to examine whether reducing sedentary time can be sustained  
7  
8 387 long-term and whether long-term changes result in significant reductions in risk for chronic diseases.  
9  
10

11 388  
12  
13 389  
14  
15 390 **Funding Source:** This study was funded by Oak Ridge Associated Universities grant #212112.  
16

17 391  
18  
19 392 **Competing Interests:** All authors have completed the ICMJE uniform disclosure form at  
20  
21 [www.icmje.org/coi\\_disclosure.pdf](http://www.icmje.org/coi_disclosure.pdf) and declare: no financial support from the funder Oak Ridge  
22 393  
23 394 Associated Universities for the submitted work, no financial relationships with any organizations that  
24  
25 395 might have an interest in the submitted work in the previous three years, and no other relationships or  
26  
27 396 activities that could appear to have influenced the submitted work.  
28  
29  
30

31 397 **Contributorship Statement:**  
32  
33

- 34  
35 398 • Dr. Lucas Carr was responsible for the design of the study and lead the manuscript  
36  
37 399 preparation.  
38  
39 400 • Dr. Kristina Karvinen assisted in the design of the study and assisted in the manuscript  
40  
41 401 preparation.  
42  
43 402 • Ms. Mallory Peavler contributed to the manuscript preparation and was solely responsible for  
44  
45 403 leading the intervention which included duties of interacting with participants on a daily basis.  
46  
47 404 • Ms. Rebecca Smith and Ms. Kayla Cangelosi both contributed to the manuscript preparation  
48  
49 405 and were responsible for collecting data at the baseline and post-intervention time points.  
50  
51  
52

53 406 **Data Sharing**  
54  
55 407

- 56 408 • Extra data is available by emailing Dr. Lucas Carr at [lucas-carr@uiowa.edu](mailto:lucas-carr@uiowa.edu).  
57 409  
58  
59  
60

1  
2 410 **Figure Legend**

3  
4 411  
5  
6 412 **Figure 1.** Sequence of events and recruitment/enrollment schematic. Study was coordinated at East  
7  
8 Carolina University, Greenville, NC, from June 2011-June 2012.  
9 413

10 414  
11  
12  
13 415 **Figure 2.** Images of intervention features: A. Portable pedal machine, B. Pedal machine activity  
14 tracking software screenshot, C. Pedal machine monitor feedback; D. Pedometer; and E. Screenshot  
15 416 of the website homepage.  
16 417  
17  
18  
19 418  
20  
21 419  
22  
23 420  
24  
25 421  
26  
27 422  
28  
29 423  
30  
31 424  
32  
33 425  
34  
35 426  
36  
37 427  
38  
39 428  
40  
41 429  
42  
43 430  
44  
45 431  
46  
47 432  
48  
49 433  
50  
51 434  
52  
53 435  
54  
55 436  
56  
57  
58  
59  
60

1  
2 437  
3  
4 438 **REFERENCES**  
5

- 6 439 1. Warren TY, Barry V, Hooker SP, et al. Sedentary behaviors increase risk of cardiovascular disease  
7 440 mortality in men. *Med Sci Sports Exercise* 2010;42(5):879-85.  
8 441 2. Thorp AA, Healy GN, Owen N, et al. Deleterious associations of sitting time and television viewing  
9 442 time with cardiometabolic risk biomarkers: Australian Diabetes, Obesity and Lifestyle  
10 443 (AusDiab) study 2004-2005. *Diabetes Care* 2010;33(2):327-34.  
11 444 3. Roberts CK, Vaziri ND, Sindhu RK, et al. A high-fat, refined-carbohydrate diet affects renal NO  
12 445 synthase protein expression and salt sensitivity. *J Appl Physiol* 2003;94(3):941-6 .  
13 446 4. Beunza JJ, Martinez-Gonzalez MA, Ebrahim S, et al. Sedentary behaviors and the risk of incident  
14 447 hypertension: the SUN Cohort. *Am J Hypertens* 2007;20(11):1156-62.  
15 448 5. Ford ES, Kohl HW, 3rd, Mokdad AH, et al. Sedentary behavior, physical activity, and the metabolic  
16 449 syndrome among U.S. adults. *Obesity Res* 2005;13(3):608-14.  
17 450 6. Must A, Tybor DJ. Physical activity and sedentary behavior: a review of longitudinal studies of  
18 451 weight and adiposity in youth. *Int J Obes (Lond)* 2005;29 Suppl 2:S84-96.  
19 452 7. Dunstan DW, Kingwell BA, Larsen R, et al. Breaking up prolonged sitting reduces postprandial  
20 453 glucose and insulin responses. *Diabetes Care* 2012;35(5):976-83.  
21 454 8. Duvivier BM, Schaper NC, Bremers MA, et al. Minimal intensity physical activity (standing and  
22 455 walking) of longer duration improves insulin action and plasma lipids more than shorter  
23 456 periods of moderate to vigorous exercise (cycling) in sedentary subjects when energy  
24 457 expenditure is comparable. *PLoS One* 2013;8(2):e55542.  
25 458 9. Thorp AA, Healy GN, Winkler E, et al. Prolonged sedentary time and physical activity in workplace  
26 459 and non-work contexts: a cross-sectional study of office, customer service and call centre  
27 460 employees. *Int J Behav Nutr Phys Act* 2012;9:128.  
28 461 10. Carr LJ, Walaska KA, Marcus BH. Feasibility of a portable pedal exercise machine for reducing  
29 462 sedentary time in the workplace. *Br J Sports Med* 2012;46(6):430-5.  
30 463 11. McCrady SK, Levine JA. Sedentariness at work: how much do we really sit? *Obesity (Silver*  
31 464 *Spring)* 2009;17(11):2103-5.  
32 465 12. Brownson RC, Boehmer TK, Luke DA. Declining rates of physical activity in the United States:  
33 466 what are the contributors? *Annu Rev Public Health* 2005;26:421-43.  
34 467 13. Church TS, Thomas DM, Tudor-Locke C, et al. Trends over 5 decades in U.S. occupation-related  
35 468 physical activity and their associations with obesity. *PLoS One* 2011;6(5):e19657.  
36 469 14. Conn VS, Hafdahl AR, Cooper PS, et al. Meta-analysis of workplace physical activity  
37 470 interventions. *American journal of preventive medicine* 2009;37(4):330-9.  
38 471 15. Dishman RK, Oldenburg B, O'Neal H, et al. Worksite physical activity interventions. *Amer J Prev*  
39 472 *Med* 1998;15(4):344-61.  
40 473 16. Stokols D, Pelletier KR, Fielding JE. The ecology of work and health: research and policy  
41 474 directions for the promotion of employee health. *Health Educ Q* 1996;23(2):137-58.  
42 475 17. Chau JY, der Ploeg HP, van Uffelen JG, et al. Are workplace interventions to reduce sitting  
43 476 effective? A systematic review. *Prev Med* 2010;51(5):352-6.  
44 477 18. Healy GN, Eakin EG, Lamontagne AD, et al. Reducing sitting time in office workers: Short-term  
45 478 efficacy of a multicomponent intervention. *Prev Med* 2013;57(1):43-8.  
46 479 19. Evans RE, Fawole HO, Sheriff SA, et al. Point-of-choice prompts to reduce sitting time at work: a  
47 480 randomized trial. *Amer J Prev Med* 2012;43(3):293-7.  
48 481 20. Alkhajah TA, Reeves MM, Eakin EG, et al. Sit-stand workstations: a pilot intervention to reduce  
49 482 office sitting time. *Amer J Prev Med* 2012;43(3):298-303.  
50 483 21. Random.org. Random Sequence Generator. Secondary Random Sequence Generator 2011.  
51 484 <http://www.random.org/sequences/>.  
52 485 22. Bandura, editor. *Social Foundations of Thought and Action: A Social Cognitive Theory*.  
53 486 Englewood Cliffs, NJ: Prentice-Hall, 1986.  
54  
55  
56  
57  
58  
59  
60

23. Mudge S, Taylor D, Chang O, et al. Test-retest reliability of the StepWatch Activity Monitor outputs in healthy adults. *J Phys Act Health* 2010;7(5):671-6.
24. Foster RC, Lanningham-Foster LM, Manohar C, et al. Precision and accuracy of an ankle-worn accelerometer-based pedometer in step counting and energy expenditure. *Prev Med* 2005;41(3-4):778-83.
25. Carr LJ, Mahar MT. Accuracy of intensity and inclinometer output of three activity monitors for identification of sedentary behavior and light-intensity activity. *J Obes*; 2012;1-9.
26. Rowe DA, Welk GJ, Heil DP, et al. Stride rate recommendations for moderate-intensity walking. *Med Sci Sports Exercise* 2011;43(2):312-8.
27. ACSM. ACSM's Guidelines for Exercise Testing and Prescription. In: ACSM, ed. Seventh ed: Lippincott Williams & Wilkins, 2006.
28. Issa JS, Strunz C, Giannini SD, et al. Precision and accuracy of blood lipid analyses by a portable device (Cholestech-LDX). *Arquivos brasileiros de cardiologia* 1996;66(6):339-42.
29. Ebbeling CB, Ward A, Puleo EM, et al. Development of a single-stage submaximal treadmill walking test. *Med Sci Sports Exercise* 1991 23;8:966-73.
30. Van Breukelen GJ. ANCOVA versus change from baseline: more power in randomized studies, more bias in nonrandomized studies [corrected]. *J Clin Epidemiol* 2006;59(9):920-5.
31. Kozey-Keadle S, Libertine A, Staudenmayer J, et al. The Feasibility of Reducing and Measuring Sedentary Time among Overweight, Non-Exercising Office Workers. *J Obes* 2012:1-10.
32. Owen N, Sparling PB, Healy GN, et al. Sedentary behavior: emerging evidence for a new health risk. *Mayo Clin Proc* 2010;85(12):1138-41.
33. Rhodes RE, Mark RS, Temmel CP. Adult sedentary behavior: a systematic review. *Am J Prev Med* 2012;42(3):e3-28.
34. Thorp AA, Owen N, Neuhaus M, et al. Sedentary behaviors and subsequent health outcomes in adults a systematic review of longitudinal studies, 1996-2011. *Am J Prev Med* 2011;41(2):207-15.
35. Coutinho T, Goel K, Correa de Sa D, et al. Combining body mass index with measures of central obesity in the assessment of mortality in subjects with coronary disease: role of "normal weight central obesity". *J Am Coll Cardiol* 2013;61(5):553-60.
36. Carr LJ, Bartee RT, Dorozynski C, et al. Internet-delivered behavior change program increases physical activity and improves cardiometabolic disease risk factors in sedentary adults: results of a randomized controlled trial. *Prev Med* 2008;46(5):431-8.
37. Healy GN, Dunstan DW, Salmon J, et al. Breaks in sedentary time: beneficial associations with metabolic risk. *Diabetes Care* 2008;31(4):661-6 ..
38. Spittaels H, De Bourdeaudhuij I, Vandelanotte C. Evaluation of a website-delivered computer-tailored intervention for increasing physical activity in the general population. *Prev Med* 2007;44(3):209-17.
39. Vandelanotte C, Spathonis KM, Eakin EG, et al. Website-delivered physical activity interventions a review of the literature. *Am J Prev Med* 2007;33(1):54-64.
40. van den Berg MH, Ronday HK, Peeters AJ, et al. Engagement and satisfaction with an Internet-based physical activity intervention in patients with rheumatoid arthritis. *Rheumatology (Oxford, England)* 2007;46(3):545-52.
41. Lewis B, Williams D, Dunsiger S, et al. User attitudes towards physical activity websites in a randomized controlled trial. *Prev Med* 2008;47(5):508-13.
42. Proper KI, van der Beek AJ, Hildebrandt VH, et al. Short term effect of feedback on fitness and health measurements on self reported appraisal of the stage of change. *Br J Sports Med* 2003;37(6):529-34.
43. Bravata DM, Smith-Spangler C, Sundaram V, et al. Using pedometers to increase physical activity and improve health: a systematic review. *JAMA* 2007;298(19):2296-304.



1  
2 1 **Multicomponent Intervention to Reduce Daily Sedentary Time: A Randomized Controlled Trial**  
3  
4 2

5  
6 3 **Corresponding Author:**  
7

8 4 Lucas J. Carr, Ph.D.; University of Iowa; Department of Health and Human Physiology; Field House  
9  
10 5 E118; Iowa City, IA 52242; Phone: (319)353-5432; Email: Lucas-Carr@uiowa.edu  
11  
12 6

13  
14  
15 7 **Co-Authors:**  
16

17 8 Kristina Karvinen, Ph.D.; School of Physical and Health Education; Nipissing University; North Bay,  
18  
19 9 Ontario, Canada  
20

21 10 Mallory Peavler, M.S., Department of Kinesiology; East Carolina University; Greenville, NC, USA  
22

23 11 Rebecca Smith, M.S.; Department of Kinesiology; East Carolina University; Greenville, NC, USA  
24

25 12 Kayla Cangelosi, M.S.; Department of Kinesiology; East Carolina University; Greenville, NC, USA  
26  
27 13

28  
29  
30 14 **Word Count:**  
31

32 15 **Keywords:** sedentary, multicomponent, cardiometabolic  
33  
34 16  
35  
36  
37 17  
38  
39 18  
40  
41 19  
42  
43 20  
44  
45 21  
46  
47 22  
48  
49  
50 23  
51  
52 24  
53  
54 25  
55  
56 26  
57  
58 27  
59  
60

## ABSTRACT

**Background.** Excessive sedentary behavior has been estimated to be responsible for 9% of premature deaths worldwide. The purpose of this study was to test the efficacy of a multicomponent technology intervention for reducing daily sedentary time and improving cardiometabolic disease risk amongst sedentary, overweight university employees using a randomized controlled trial design.

**Methods.** Forty adults working in sedentary jobs were randomized to either: 1) an intervention group (N=23; 47.6±9.9 yrs; 94.1% female; 33.2±4.5 kg/m<sup>2</sup>); 2) or wait list control group (N=17; 42.6±8.9 yrs; 86.9% female; 31.7±4.9 kg/m<sup>2</sup>). The intervention group received a theory-based, internet-delivered program, a portable pedal machine at work and a pedometer for 12 weeks. Primary (sedentary and physical activity behavior measured objectively via StepWatch) and secondary (heart rate, blood pressure, height, weight, waist circumference, percent body fat, cardiorespiratory fitness, fasting lipids) outcomes were measured at baseline and post-intervention. Exploratory outcomes including intervention compliance and process evaluation measures were also assessed post-intervention.

**Results.** The intervention group reduced time spent sedentary (-57.8 minutes/day; p<0.01) and waist circumference (-1.0 cm; p=0.03) compared to the control group after adjusting for baseline values.

Intervention participants logged onto the website 71.3% of all intervention days, used the pedal machine 37.7% of all working intervention days, and pedaled an average of 31.1 minutes/day.

**Discussion.** These findings suggest the intervention was engaging and resulted in reductions in daily sedentary time amongst full-time sedentary employees. These findings hold public health significance due to the growing number of sedentary jobs and the potential of these technologies in large-scale worksite programs. ClinicalTrials.gov #NCT01371084

## Article focus

- The primary aim of this study was to test the effectiveness of a multicomponent intervention for reducing daily sedentary time and improving cardiometabolic risk factors amongst a sample of sedentary, overweight, full-time working adults compared to a waitlist control.

- 1  
2 54 • We hypothesized that the intervention group would significantly reduce daily sedentary time  
3  
4 55 and select cardiometabolic disease risk factors compared to the wait-list control group after 12  
5  
6 56 weeks.  
7  
8  
9 57 • As an exploratory aim, we conducted a process evaluation to explore intervention compliance  
10  
11 58 and identify helpful components of the intervention.  
12

### 13 59 **Key messages**

- 14  
15 60 • This multicomponent intervention resulted in significant reductions in time spent sedentary  
16  
17 61 and waist circumference when comparing the intervention group to the wait list control  
18  
19  
20 62 group.  
21  
22 63 • The present study builds upon past studies as our study was among the first to demonstrate  
23  
24 64 significant reductions in objectively measured sedentary time when compared to a control  
25  
26 65 group.  
27  
28  
29 66 • The findings of this study are important given the paucity of research in this area and  
30  
31 67 growing evidence demonstrating the importance of limiting daily sedentary time for  
32  
33 68 reducing risk of chronic diseases.  
34

### 35 69 **Strengths**

- 36  
37  
38 70 • Primary strengths of this study include: 1) among the first RCT's to target sedentary time as a  
39  
40 71 primary outcome; 2) among the first RCT's to use an objective measure of sedentary time; 3)  
41  
42 72 conducted a 12 week trial which extends previous sedentary interventions that have typically  
43  
44 73 been of brief durations; 4) measured cardiometabolic risk factors; and 5) conducted a process  
45  
46 74 evaluation to identify features of the intervention that worked particularly well.  
47

### 48 75 **Limitations**

- 49  
50  
51 76 • Primary limitations of this study include: 1) small sample size (N=40) comprised primarily of  
52  
53 77 middle-aged females working at a single institution which limits generalizability; and 2)  
54  
55 78 differential drop out, although follow-up analyses indicate no differences between those that  
56  
57  
58  
59  
60

1  
2 79 | dropped and those that completed for age (P=0.48), BMI (P=0.63), or daily sedentary time  
3  
4 80 | (P=0.32).  
5  
6 81  
7  
8 82  
9

## 10 83 INTRODUCTION

11  
12  
13 84 | Excessive time spent in sedentary behavior is an independent risk factor for multiple chronic  
14  
15 85 | health outcomes including cardiovascular disease,[1 2] type 2 diabetes,[3] hypertension,[4] metabolic  
16  
17 86 | syndrome[5] and obesity.[6] Conversely, recent acute experimental studies suggest interrupting  
18  
19 87 | and/or replacing excessive sedentary behavior with light intensity physical activity throughout the day  
20  
21 88 | may be effective for improving various cardiometabolic disease risk factors.[7 8]  
22

23  
24 89 | The modern workplace has been identified as a setting in which individuals engage in  
25  
26 90 | prolonged bouts of sedentary time [9]. Adults working in full-time sedentary jobs are at particular risk  
27  
28 91 | for being sedentary as they often spend more than 75% of work time sitting[9-11].Currently, more  
29  
30 92 | than 27% of the U.S. labor force works in low-activity occupations.[12] The observed decline in  
31  
32 93 | occupational energy expenditure (~100 kcals/day) over the past 50 years has been identified as a key  
33  
34 94 | contributor to the observed increase in mean body mass amongst U.S. adults over the same time  
35  
36 95 | period.[13] Traditional behaviorally focused worksite interventions have focused primarily on  
37  
38 96 | increasing physical activity and have resulted in modest effect sizes (Cohen's  $d = 0.21-0.22$ ).[14 15]  
39  
40 97 | In a shift away from behaviorally focused approaches, studies grounded in social ecological  
41  
42 98 | theory[16] have begun testing the effect of modifying the work environment to reduce occupational  
43  
44 99 | sedentary time.

45  
46  
47 100 | To date, only a handful of sedentary interventions have been conducted in the worksite. While  
48  
49 101 | many early worksite sedentary interventions did not demonstrate effectiveness [17], more recent trials  
50  
51 102 | have shown promise for reducing sitting time [18-20]. Overall, many sedentary interventions studies  
52  
53 103 | conducted in the worksite have been limited by the use of self-report measures of sedentary time  
54  
55 104 | and/or short duration interventions (1-4 weeks). Further, most studies in this area have promoted  
56  
57 105 | reduced 'sitting time'. Given the recent availability of seated activity permissive workstations [10] and  
58  
59  
60

1  
2 106 the possible desire/need of many employers and employees to remain seated while completing their  
3  
4 107 work, there is a need for interventions that promote 'active sitting' as opposed to 'reduced sitting' as a  
5  
6 108 means for reducing sedentary time.

8  
9 109 In a previous study testing the feasibility of modifying the work environment as a means of  
10  
11 110 reducing occupational sedentary time through promoting active sitting, our team provided portable  
12  
13 111 pedal machines (MagneTrainer, 3D Innovations) to 18 sedentary desk workers for four weeks [10].  
14  
15 112 Importantly, participants rated the pedal machines as feasible and acceptable for use while  
16  
17 113 completing their work. Further, despite a lack of any accompanying behavioral intervention,  
18  
19 114 participants used the pedal machines on 61% of all work days for an average of 23.4 minutes per  
20  
21 115 day. Although these results are promising, it is possible the addition of a motivational behavioral  
22  
23 116 intervention could result in increased pedaling compliance and reduced sedentary time.

25  
26 117 The primary aim of the present study was to test the effectiveness of a multicomponent  
27  
28 118 intervention for reducing daily sedentary time and improving cardiometabolic risk factors amongst a  
29  
30 119 sample of sedentary, overweight, full-time working adults compared to a wait-list control group. We  
31  
32 120 hypothesized that the intervention group would significantly reduce daily sedentary time and select  
33  
34 121 cardiometabolic disease risk factors compared to the wait-list control group after 12 weeks. As an  
35  
36 122 exploratory aim, we conducted a process evaluation to explore intervention compliance and identify  
37  
38 123 helpful components of the intervention.

## 43 125 **METHODS**

### 45 126 **Subjects and Design**

47  
48 127  
49  
50 128 Many sedentary interventions to date have been limited by short durations. Therefore, we  
51  
52 129 conducted a 12 week randomized controlled trial design comparing a treatment group to a no  
53  
54 130 treatment wait-list control group. We recruited apparently healthy but sedentary (self-reporting less  
55  
56 131 than 60 minutes of moderate-to-vigorous intensity physical activity per week), overweight (body mass  
57  
58 132 index (BMI)  $\geq 25.0$  kg/m<sup>2</sup>) adults working in full-time (reporting minimum of 35.0+ hours/week)

1  
2 133 sedentary/desk-dependent occupations (reporting minimum of 75% of working time spent sitting).  
3  
4 134 Participants were required to gain permission from their supervisor prior to enrollment. Research staff  
5  
6 135 members screened participants for eligibility by telephone. Exclusionary criteria included: 1)  
7  
8 136 limitations with or contraindications to ambulatory exercise; 2) acute illness or injury; 3) cognitive  
9  
10 137 impairment, psychosis, or other diagnosed psychological illness (with the exception of depression and  
11  
12 138 anxiety); 4) currently using psychotropic drugs; or 5) diagnosis of a chronic condition such as heart  
13  
14 139 failure or cancer. Participants were not compensated for participation in the study. Experimental  
15  
16 140 protocols were approved by the University and Medical Center Institutional Review Board and  
17  
18 141 voluntary written informed consent was obtained from each participant.  
19

20  
21  
22 142 Participants of all races and ethnic backgrounds working at a large southern university were  
23  
24 143 passively recruited through email advertisements placed on an electronic mailing list serve that  
25  
26 144 served 5,392 employees. A total of 192 people responded to our advertisements of which 143 were  
27  
28 145 excluded from participation due to: not meeting eligibility criteria which primarily consisted of not  
29  
30 146 meeting BMI and/or physical activity requirements -(N=120); declined to participate (N=19); or other  
31  
32 147 reasons (N=4). A 1:1 random allocation sequence was generated by the principal investigator using  
33  
34 148 an online random sequence generator.[21] Participants were assigned to one of two groups by a  
35  
36 149 research staff member not involved in data collection based on the order in which they enrolled into  
37  
38 150 the study. A total of 49 participants deemed interested and eligible for participation were randomized  
39  
40 151 to one of two groups: 1) intervention (N=25); 2) wait-list control (N=24). Of the 49 enrolled, 40  
41  
42 152 participants completed all baseline and post-intervention assessments. Nine participants were lost to  
43  
44 153 follow-up (see Figure 1). Final analyses were completed on 40 participants with 23 intervention  
45  
46 154 participants and 17 control participants (see Table 1). More than half of all participants were college  
47  
48 155 educated, reported an annual income greater than \$40,000 and reported being non-Hispanic/White.  
49  
50 156 Participants were enrolled and completed all testing sessions between June 2011 and June 2012.  
51  
52  
53  
54 157  
55

56 158 [Figure 1 here]  
57  
58 159  
59  
60

## Group Descriptions

### *Wait List Control Group*

Participants randomized to the wait-list control group were asked to maintain their current behaviors for 12 weeks at which time they were given the option to receive the intervention treatment materials.

### *Intervention Group*

The primary intent of the intervention was to encourage participants to reduce their time spent sedentary. The name used to promote the study on advertisements and study materials was "Pedal@Work: Reducing time spent sedentary...". The intervention (Figure 2) comprised of three primary components: 1) access to a portable pedal machine (MagneTrainer, 3D Innovations, Greeley, CO) at their worksite; 2) access to a motivational website (Walker Tracker, Portland, OR) to receive tips and reminders focused on reducing sedentary behaviors throughout the day; and 3) a pedometer to use in conjunction with the website (Omron HJ-150). The pedal machine is a portable (18" height, 20" length) device that has been demonstrated as acceptable for use during sedentary office work [10]. Because participants were sedentary employees working in professional environments, the rationale for providing them pedal machines at work was to allow them to engage in light intensity activity (i.e. active sitting) that they could perform for long periods throughout the day without causing them to perspire. The pedal machine is accompanied by a PC interface and software package that allows for objective monitoring of individual pedal activity. This software also provides the user with real-time feedback via a display monitor on pedal time, distance, speed and caloric expenditure. The research team delivered the pedal machine to each participant's worksite, downloaded the pedal tracking software to the participant's work computer, and worked with the participant to identify the most feasible set up. Intervention participants were asked to keep the pedal machine connected to their PC during all working hours. Intervention participants were required to gain clearance to use the pedal machines and software at their work prior to participation. No additional interaction between the

1  
2 187 research staff and participant's supervisors occurred during the course of the study. Participants were  
3  
4 188 located in 18 different buildings across campus. No participants worked within visible proximity of  
5  
6 189 each other.  
7

8  
9 190 Intervention participants were also provided access to a motivational website that was  
10  
11 191 individually customized to the local culture of the worksite of which participants were recruited (Figure  
12  
13 192 2). Examples of customization included posting local images and messages specific to the local  
14  
15 193 institution. The content of the intervention focused primarily on reducing time spent sedentary (both  
16  
17 194 increasing active sitting via pedaling and taking breaks from sitting). Example messages included  
18  
19 195 "Let's try to pedal an extra five minutes during your lunch break today" and "Did you know standing up  
20  
21 196 burns more calories than sitting? Maybe it's time for a break!?" Most messages targeted time spent at  
22  
23 197 work although some messages broadly targeted sedentary time in general and could have impacted  
24  
25 198 sedentary time outside of work. Messages were theory based targeting constructs of the Social  
26  
27 199 Cognitive Theory[22] including self-monitoring, social support, self-efficacy, and perceived  
28  
29 200 environment. For example, participants were prompted via daily email messages to self-monitor their  
30  
31 201 daily pedal time and daily steps (via pedometer) on the website. The activity participants logged on  
32  
33 202 the website was used to fuel a virtual competition (aimed at building social support) in which small  
34  
35 203 groups of intervention participants (4-5 per group) collectively traveled across America. Participants  
36  
37 204 were also emailed three theory-based motivational messages each week targeting goal setting, self-  
38  
39 205 efficacy, and perceived environment. Specific goals were not set for intervention participants, rather  
40  
41 206 participants received advice on how to set goals and suggestions for daily pedaling time (e.g. "Try  
42  
43 207 fitting in 10 minutes of pedaling during your lunch today.") Finally, using a forum similar to Facebook,  
44  
45 208 participants were able to post profile photos and status updates on a newsfeed and send messages  
46  
47 209 to members of their small groups further fostering social support.  
48  
49  
50  
51

52 210  
53  
54 211 [Figure 2 here]  
55

56 212  
57  
58 213 **Measures**  
59  
60



1  
2 214 All measures were collected at baseline and post-intervention (12 weeks) in a controlled  
3  
4 215 laboratory setting by two staff members blinded to participant's group assignment. The two staff  
5  
6 216 members were provided specific measurement duties to ensure each measure was collected by the  
7  
8 217 same staff member at both baseline and post-intervention. The primary outcome was daily sedentary  
9  
10 218 time as measured objectively by the StepWatch physical activity monitor (Orthocare Innovations,  
11  
12 219 Mountlake Terrace, Wash, USA). The StepWatch was specifically chosen for this study as it is worn  
13  
14 220 on the ankle making it ideally suited to measure both pedaling and walking behavior. Further, the  
15  
16 221 StepWatch has been demonstrated as a reliable measure of walking behavior (3 day agreements for  
17  
18 222 steps per day (39.1%) and percent inactive time ( 9.52%)) [23] and an accurate measure of both  
19  
20 223 sedentary behaviors (89.8-99.5% accurate) and light intensity walking (86.1% accurate)[24]. The  
21  
22 224 StepWatch has demonstrated superior ability for detecting pedaling time (23.5-54.4% accurate) when  
23  
24 225 compared to hip worn accelerometers (8.1-47.1% correct).[25] Participants were asked to wear the  
25  
26 226 monitor during all wakeful hours for seven consecutive days and keep track of wear time using an  
27  
28 227 activity log. Days in which participants wore the monitors for less than 10 hours were excluded from  
29  
30 228 final analysis. Intervention participants wore the StepWatch monitor an average of 5.7 of 7.0 (81.0%)  
31  
32 229 days for 14.5 hours/day while control participants wore the monitor an average of 5.5 days (78.6%) for  
33  
34 230 13.8 hours/day. The threshold for sedentary (0 steps/min) was based on the recommendation  
35  
36 231 provided by the product manufacturer. The thresholds for light (1–45 steps/min), moderate- (46-75  
37  
38 232 steps/min) and vigorous (76+ steps/min) intensity physical activities were based on previous work  
39  
40 233 which demonstrated moderate-intensity walking stride rate to range from 90–113 steps/minute  
41  
42 234 depending on height and stride length[26].

43  
44 235 Blood pressure was measured with a stethoscope and sphygmomanometer using standard  
45  
46 236 techniques. Heart rate was monitored with a Polar™ heart rate monitor and chest strap. Body mass  
47  
48 237 was measured to the nearest 0.1 kg and height to the nearest 0.5 cm using a professional grade  
49  
50 238 digital medical scale and height rod (Seca 769, Hanover, MD). Waist circumference was measured in  
51  
52 239 duplicate with a standard Gulick measuring tape according to standard procedures.[27] Fasting blood  
53  
54 240 lipids (total cholesterol, LDL cholesterol, HDL cholesterol, and triglycerides) were assessed via finger  
55  
56  
57  
58  
59  
60

1  
2 241 stick and using a point-of-care analyzer (Cholestech LDX analyzer) that has previously been  
3  
4 242 demonstrated as an accurate and precise measure of total cholesterol (1.6% and 3.0% respectively),  
5  
6 243 HDL-cholesterol (-2.74% and 1.05% respectively) and triglycerides (2.11% and 2.65%  
7  
8  
9 244 respectively).[28] Estimated aerobic fitness was assessed via a single-stage submaximal treadmill  
10  
11 245 walking test which had been previously demonstrated as a valid estimate of total aerobic fitness  
12  
13 246 amongst middle-aged adults.[29]

14  
15 247 Compliance with the pedal machine (i.e., minutes pedaled/day, total days pedaled) was  
16  
17 248 assessed objectively via the activity tracking software. Pedal compliance data was downloaded  
18  
19 249 directly from each individual's work computer at the end of 12 weeks. Website use compliance (e.g.,  
20  
21 250 number of website logins, number of steps logged on the website) was assessed objectively at the  
22  
23 251 end of 12 weeks via a backend tracking database made available by the website administrators. In  
24  
25  
26 252 order to assess which components of the intervention participants 'perceived' as helpful for reducing  
27  
28 253 their sedentary time, a process evaluation survey was conducted at 12 weeks amongst intervention  
29  
30 254 completers. Participants rated each intervention component using a five point Likert scale.  
31  
32  
33  
34

### 35 256 **Design/Statistical Analysis**

36  
37 257 A sample size of 40 (recruiting 49 assuming 20% attrition) was necessary to detect, with 80%  
38  
39 258 power, at  $\alpha=0.05$ , a 30 minute/day difference in daily sedentary time. The 30 minute/day difference  
40  
41 259 was identified as a reasonable estimate based on our previous study in which participants used the  
42  
43 260 same pedal machines an average of 23 minutes/day without any motivational intervention.[10] Means  
44  
45 261 (SD) were used to describe data where appropriate.

46  
47 262 The paired samples t-test was used to determine any within group differences at baseline and  
48  
49 263 post-intervention. Analysis of covariance (ANCOVA) was used to test for differences between groups  
50  
51 264 at post-intervention. Baseline values of interest were included as covariates in the model for all  
52  
53 265 continuous variables consistent with recommended statistical procedures [30]. The underlying  
54  
55 266 assumption no between group differences at baseline was confirmed for all measures by one way  
56  
57  
58  
59  
60

ANOVA. Finally, the 95% confidence interval (CI) for the mean differences of all primary and secondary outcomes of interest are presented.

## RESULTS

Baseline characteristics of both groups are presented in Table 1. Overall, participants were middle-aged and mostly classified as obese. More than half of all participants were college educated, reported an annual income greater than \$40,000 and reported being non-Hispanic/White. Differential drop out was observed over the course of the study, although sensitivity analyses indicate no differences between those that dropped and those that completed the study for measures of age (P=0.48), BMI (P=0.63), or daily sedentary time (P=0.32).

**Table 1.** Baseline characteristics by group Mean  $\pm$  S.D. (N=40)

|                        | Control Group<br>N=17 | Intervention Group<br>N=23 | All<br>(N=40) |
|------------------------|-----------------------|----------------------------|---------------|
| Age (years)            | 47.6(9.9)             | 42.6(8.9)                  | 44.7(9.6)     |
| Female %               | 94.1%                 | 86.9%                      | 90%           |
| Height (in)            | 65.2(3.2)             | 65.4(3.4)                  | 65.4(3.4)     |
| Weight (lbs)           | 201.3(30.2)           | 194.1(34.9)                | 197.2(32.8)   |
| Body Mass Index (BMI)  | 33.2(4.5)             | 31.7(4.9)                  | 32.4(4.8)     |
| Non-Hispanic White (%) | 76.5%                 | 63.6%                      | 70.0%         |
| College Graduate (%)   | 71.0%                 | 86.0%                      | 78.5%         |
| Income >\$40,000 (%)   | 62.5%                 | 63.6%                      | 63.0%         |

Table 2 illustrates changes in the primary outcomes of sedentary and physical activity behaviors for both groups. No differences were observed for any of these measures at baseline. A significant intervention effect favoring the intervention group (95% CI, -0.99, 118.4 minutes/day) was observed for absolute number of daily sedentary minutes after adjusting for baseline values.

Intervention effects reached near significance for both percent daily time spent sedentary (95% CI, -6.8%, -0.6%) and percent time spent in moderate intensity physical activity (95% CI, 0.0, 2.6%) (see Table 2).

**Table 2.** Absolute and relative time spent in sedentary and physical activity behaviors at baseline and post-intervention for Control (N=17) and Intervention (N=23) participants. Data presented as Mean(SD).

|                          | <u>Baseline</u> | <u>Post-Intervention</u> | <u>Mean Difference<sup>a</sup><br/>(95% CI)</u> | <u>Within Group<br/>P value</u> | <u>Between Group P value<br/>(Post)</u> |
|--------------------------|-----------------|--------------------------|-------------------------------------------------|---------------------------------|-----------------------------------------|
| <b>Minutes Sedentary</b> |                 |                          |                                                 |                                 | <0.01**                                 |
| Control                  | 544.2(76.9)     | 599.7(106.6)             | +55.5 (2.8, 108.1)                              | 0.04*                           |                                         |
| Intervention             | 584.9(136.1)    | 526.1(77.3)              | -58.7 (-118.4, 0.99)                            | 0.04*                           |                                         |
| <b>% Time Sedentary</b>  |                 |                          |                                                 |                                 | 0.06                                    |
| Control                  | 65.7(7.5)       | 67.5(8.0)                | -1.8% (-2.7%, 6.3%)                             | 0.41                            |                                         |
| Intervention             | 67.6(7.2)       | 63.9(7.9)                | -3.7% (-6.8%, -0.6%)                            | 0.02*                           |                                         |
| <b>Minutes Light</b>     |                 |                          |                                                 |                                 | 0.64                                    |
| Control                  | 265.7(84.0)     | 262.2(70.8)              | - 3.5 (-45.6, 38.6)                             | 0.86                            |                                         |
| Intervention             | 263.9(69.5)     | 270.3(69.5)              | +6.4 (-18.7, 31.5)                              | 0.6                             |                                         |
| <b>% Time Light</b>      |                 |                          |                                                 |                                 | 0.16                                    |
| Control                  | 31.9(8.1)       | 30.3(8.4)                | -1.6% (-6.0%, 2.8%)                             | 0.46                            |                                         |
| Intervention             | 30.6(8.2)       | 32.7(7.6)                | 2.1% (-0.8%, 4.9%)                              | 0.15                            |                                         |
| <b>Minutes Moderate</b>  |                 |                          |                                                 |                                 | 0.13                                    |
| Control                  | 18.6(25.2)      | 17.4(23.7)               | -1.2 (-4.9, 2.4)                                | 0.5                             |                                         |
| Intervention             | 14.5(18.5)      | 23.3(28.0)               | +8.8 (-1.6, 19.2)                               | 0.09                            |                                         |
| <b>% Time Moderate</b>   |                 |                          |                                                 |                                 | 0.06                                    |
| Control                  | 2.3(3.2)        | 2.0(2.9)                 | -0.3% (-0.7%, 0.2%)                             | 0.21                            |                                         |
| Intervention             | 1.5(1.5)        | 2.8(3.4)                 | +1.3% (0.0%, 2.6%)                              | 0.04*                           |                                         |
| <b>Minutes Vigorous</b>  |                 |                          |                                                 |                                 | 0.33                                    |
| Control                  | 1.2(2.6)        | 1.5(2.7)                 | +0.4 (-0.2, 0.9)                                | 0.19                            |                                         |
| Intervention             | 2.7(6.4)        | 4.9(10.9)                | +2.2 (-2.7, 7.0)                                | 0.37                            |                                         |
| <b>% Time Vigorous</b>   |                 |                          |                                                 |                                 | 0.25                                    |
| Control                  | 0.1(0.3)        | 0.2(0.3)                 | 0.0% (0.0%, 0.1%)                               | 0.32                            |                                         |
| Intervention             | 0.3(0.6)        | 0.6(1.3)                 | +0.3% (-0.3, 0.9%)                              | 0.26                            |                                         |

<sup>a</sup> Mean change from baseline (95% confidence interval), adjusted for baseline value (ANCOVA)

\* p < 0.05 for within group change from baseline (paired t-test)

\*\* p<0.05 for between group differences at post-intervention (ANCOVA)

Table 3 illustrates changes in the secondary outcomes of cardiometabolic risk factors for both groups. A significant intervention effect was observed for waist circumference  $p=0.03$  [after adjusting for baseline values](#) (Table 3). No significant [intervention](#) effects were observed for any other cardiometabolic risk factors.

**Table 3.** Cardiometabolic risk factors at baseline and post-intervention for Control (N=17) and Intervention (N=23) participants. Data presented as Mean(SD).

|                                             | <u>Baseline</u> | <u>Post-<br/>Intervention</u> | <u>Mean Difference<sup>a</sup><br/>(95% CI)</u> | <u>Within Group<br/>P value</u> | <u>Between<br/>Group P value<br/>(Post)</u> |
|---------------------------------------------|-----------------|-------------------------------|-------------------------------------------------|---------------------------------|---------------------------------------------|
| <b>Weight (lbs)</b>                         |                 |                               |                                                 |                                 | 0.58                                        |
| Control                                     | 201.4(30.2)     | 202.4(30.5)                   | +1.0 (-1.0, 3.0)                                | 0.31                            |                                             |
| Intervention                                | 194.2(34.9)     | 194.4(34.5)                   | +0.2 (-2.3, 2.7)                                | 0.86                            |                                             |
| <b>BMI (kg/m<sup>2</sup>)</b>               |                 |                               |                                                 |                                 | 0.76                                        |
| Control                                     | 33.2(4.5)       | 33.4(4.6)                     | +0.2 (-0.1, 0.5)                                | 0.21                            |                                             |
| Intervention                                | 31.8(5.0)       | 31.9(5.0)                     | -0.1 (-0.3, 0.5)                                | 0.57                            |                                             |
| <b>Systolic BP (mmHg)</b>                   |                 |                               |                                                 |                                 | 0.70                                        |
| Control                                     | 117.1(13.0)     | 117.5(12.8)                   | -0.8 (-5.0, 3.6)                                | 0.71                            |                                             |
| Intervention                                | 120.0(13.8)     | 115.7(10.8)                   | -4.3 (-8.0, -0.7)                               | 0.02*                           |                                             |
| <b>Diastolic BP (mmHg)</b>                  |                 |                               |                                                 |                                 | 0.51                                        |
| Control                                     | 72.8(10.3)      | 73.2(10.6)                    | -0.1 (-5.0, 4.8)                                | 0.96                            |                                             |
| Intervention                                | 78.2(10.3)      | 75.4(7.4)                     | -2.8 (-6.2, 0.7)                                | 0.11                            |                                             |
| <b>Waist Circumference (cm)</b>             |                 |                               |                                                 |                                 | 0.03**                                      |
| Control                                     | 92.9(11.1)      | 93.9(10.8)                    | +1.0 (-0.7, 2.7)                                | 0.22                            |                                             |
| Intervention                                | 92.6(11.2)      | 91.6(11.3)                    | -1.0 (-2.1, 0.3)                                | 0.06                            |                                             |
| <b>Estimated V<sub>O2</sub> (ml/kg/min)</b> |                 |                               |                                                 |                                 | 0.10                                        |
| Control                                     | 29.6(2.5)       | 30.0(2.6)                     | +0.3 (-0.1, 0.8)                                | 0.14                            |                                             |
| Intervention                                | 30.8(5.1)       | 31.1(4.6)                     | +0.3 (-0.6, 1.1)                                | 0.53                            |                                             |
| <b>Total Cholesterol (mg/dL)</b>            |                 |                               |                                                 |                                 | 0.83                                        |
| Control                                     | 184.4(25.9)     | 185.0(18.9)                   | -0.8 (-15.1, 13.4)                              | 0.91                            |                                             |
| Intervention                                | 191.4(26.3)     | 189.7(27.0)                   | +0.7 (-5.9, 7.2)                                | 0.83                            |                                             |
| <b>HDL (mg/dL)</b>                          |                 |                               |                                                 |                                 | 0.65                                        |
| Control                                     | 47.6(18.4)      | 46.7(18.9)                    | -0.9 (-6.8, 5.1)                                | 0.76                            |                                             |
| Intervention                                | 45.7(17.6)      | 43.7(16.4)                    | -2.1 (-8.1, 3.4)                                | 0.46                            |                                             |
| <b>LDL (mg/dL)</b>                          |                 |                               |                                                 |                                 | 0.96                                        |
| Control                                     | 111.2(32.1)     | 120.2(25.3)                   | +5.4 (-11.3, 22.1)                              | 0.50                            |                                             |
| Intervention                                | 119.4(23.2)     | 116.7(29.4)                   | -3.7 (-12.8, 5.4)                               | 0.41                            |                                             |
| <b>Triglycerides</b>                        |                 |                               |                                                 |                                 | 0.91                                        |
| Control                                     | 130.6(65.4)     | 131.0(59.9)                   | +4.7 (-24.0, 33.3)                              | 0.73                            |                                             |
| Intervention                                | 98.4(45.2)      | 118.4(57.3)                   | +18.3 (-0.1, 36.7)                              | 0.05                            |                                             |

<sup>a</sup> Mean change from baseline (95% confidence interval), adjusted for baseline value (ANCOVA)

\* p < 0.05 for within group change from baseline (paired t-test)

\*\* p < 0.05 for between group differences at post-intervention (ANCOVA)

A total of 23 participants completed the intervention and provided compliance data (see Table 4). Intervention participants logged on to the website an average of 71.3% (59.8 days) of all days they had access to the website (including weekends) (Table 4). Intervention participants also logged an average of 7945 ± 4634 steps per day on the website over the 12 weeks. Participants pedaled an average of 37.7% (22.6 days) of all days they had access to the pedal machine (excluding weekends). Participants pedaled an average of 31.1 ± 31.6 minutes per day on the days they used the pedal machines and for an average of 16.1 ± 17.2 minutes per pedaling bout

**Table 4.** Intervention compliance measures amongst Intervention completers (N=23).

|                                                    | Mean/% | S.D.        |
|----------------------------------------------------|--------|-------------|
| Web Compliance % (Days Logged in/Days with Access) | 71.3   | <u>35.7</u> |
| Average Steps Logged Per Day                       | 7945   | 4634        |
| Average Days Pedaled Over 12 Weeks                 | 22.6   | 17.6        |
| Pedal Compliance % (Days Pedaled/Days with Access) | 37.7   | <u>29.3</u> |
| Average Pedal Bouts/Day                            | 1.9    | 0.9         |
| Average Minutes Pedaled/Day Used                   | 31.1   | 31.6        |
| Average Minutes Pedaled/Pedal Bout                 | 16.1   | 17.2        |

When asked to rate the helpfulness of each intervention feature for reducing their sedentary time, participants rated the pedal machine biofeedback display, the pedometer, self-monitoring activity on the website as “extremely helpful” (median Likert score = 5.0; Table 5). Participants rated the email

reminders to log daily activity and access to the pedal machine as “quite helpful” (median Likert score = 4.0; Table 5).

**Table 5** : Quartile and median Likert scale responses (1=Not at all helpful; 2=A little helpful; 3=moderately helpful; 4=Quite helpful; 5=Extremely helpful) on helpfulness of individual intervention components for reducing sedentary time (N=23).

| Please rate how helpful each of the following intervention components was in reducing your daily sedentary time. | Likert Scale |        |     |
|------------------------------------------------------------------------------------------------------------------|--------------|--------|-----|
|                                                                                                                  | Q1           | Median | Q3  |
| Pedal machine biofeedback display (minutes pedaled, calories burned, etc.)                                       | 4.0          | 5.0    | 5.0 |
| Wearing the pedometer                                                                                            | 4.0          | 5.0    | 5.0 |
| Self-monitoring daily steps and pedal time on the website                                                        | 4.0          | 5.0    | 5.0 |
| Email reminders to log physical activity on website                                                              | 4.0          | 4.0    | 5.0 |
| Access to pedal exercise machine at work                                                                         | 4.0          | 4.0    | 5.0 |
| 'Walk Across America' Group Challenge on website                                                                 | 3.0          | 3.0    | 5.0 |
| Social networking features on website (profile, newsfeed, messaging)                                             | 3.0          | 3.0    | 4.0 |
| Environmental features (Walkscore, information on facilities)                                                    | 3.0          | 3.0    | 3.8 |

## DISCUSSION

The primary findings of this study suggest that this multicomponent intervention resulted in significant time spent sedentary in a small sample of inactive, overweight employees. The decreased sedentary time observed among the intervention group appears to be have been at least partially replaced by an increase in moderate intensity activity. Our findings are important as the present study was among the first worksite interventions to promote 'active sitting' as a means of reducing sedentary time. Further, the present study was conducted over a longer duration (12 weeks) compared to similar trials [19 31] and utilized an objective measure of sedentary/physical activity

1  
2 331 | behavior whereas many previous interventions have relied upon self-report measures of sedentary  
3  
4 332 | time[17]. The present study builds upon past studies as our study was among the first to demonstrate  
5  
6 333 | significant reductions in objectively measured sedentary time when compared to a control group. This  
7  
8 334 | is important, as it has been suggested that decreasing sedentary time can result in improved health  
9  
10 335 | benefits independent of physical activity.[2 32-34]

13 336 | Sedentary time amongst the intervention group was reduced by an average of 58 minutes/day  
14  
15 337 | or 3.7% of daily time. Our findings are within the range of similar studies. For example, Kozy-Keadle  
16  
17 338 | et al. found daily sedentary time reduced from 67.0% to 62.7% after a simple, seven day intervention  
18  
19 339 | that included educational materials on sedentary health risks and tips to reduce sedentary time.[31]  
20  
21 340 | However, this study did not include a control group. In a study that did include a control group, Evans  
22  
23 341 | et al. found no between group differences in objectively measured sitting time after five days of point-  
24  
25 342 | of-choice software reminders to stand up every 30 minutes while at work.[19]

28 343 | We also observed ~~a group x time interaction~~ a significant intervention effect for waist  
29  
30 344 | circumference. This finding is important as waist circumference has been shown to predict mortality  
31  
32 345 | amongst adults with coronary artery disease.[35] Confidence in this finding is strengthened by past  
33  
34 346 | studies that have found waist circumference to be sensitive to change in the absence of changes in  
35  
36 347 | other measures of adiposity[36] as well as studies reporting interruptions from sedentary time to be  
37  
38 348 | associated with waist circumference. [37] Furthermore, this finding is consistent with findings of a  
39  
40 349 | previous 16-week internet-delivered physical activity program which demonstrated modest  
41  
42 350 | improvements in daily steps and waist circumference. [36] The lack of changes in other  
43  
44 351 | cardiometabolic risk factors may be due to the low intensity of the intervention as well as the limited  
45  
46 352 | duration of 12 weeks. Studies of longer duration are needed to determine whether long-term  
47  
48 353 | reduction in sedentary time results in cardiometabolic risk reduction.

52 354 | Participant compliance to the website overall was high with participants logging into the  
53  
54 355 | website an average of 71% of all intervention days. This is important as past internet-delivered  
55  
56 356 | intervention studies have identified engagement to be a challenge [38 39] and a predictor of  
57  
58 357 | intervention success.[40] By comparison, Lewis et al. reported participants logged on to a physical  
59  
60



1  
2 358 activity website a median number of 50 times (13.7%) over 12 months.[41] Reasons for such high  
3  
4 359 website compliance in the present study may be due to the tailoring of the website to include locally  
5  
6 360 relevant images and messages and/or the regular email messages.

8  
9 361 Participant compliance with the pedal machines in the present 12 week trial (31 minutes/day)  
10  
11 362 was higher when compared to compliance in our previous four week trial (23 minutes/day).[10] These  
12  
13 363 findings suggest the added motivational intervention, which included suggestions for setting goals and  
14  
15 364 finding time to pedal each day, resulted in improved daily compliance that was sustained over a  
16  
17 365 longer duration. Despite the logistical limitation of the portable pedal machine when paired with  
18  
19 366 standard height desks (i.e., many participants reported their knees hit the underside of their desk  
20  
21 367 while pedaling), participants used the pedal machine on a fairly regular basis. In order to maximize  
22  
23 368 compliance with such portable pedal machines in future studies, it is recommended these devices be  
24  
25 369 paired with height adjustable desks that allow for comfortable pedaling during computer work tasks.

26  
27  
28 370 Intervention participants reported features that provided feedback including the pedal machine  
29  
30 371 tracking software, pedometers and self-monitoring daily activity on the website (which was  
31  
32 372 immediately followed by a graph illustrating the individual's daily progress) as the most helpful  
33  
34 373 features for reducing their daily sedentary time. This information is important and could be used to  
35  
36 374 inform future interventions aimed at reducing sedentary behavior. This finding is consistent with past  
37  
38 375 studies which have found biofeedback as a useful tool to improve health behaviors.[42 43]

39  
40  
41 376 The main limitation of the study was the limited generalizability due to a small sample size that  
42  
43 377 comprised primarily of middle-aged females working at a single institution. We also experienced  
44  
45 378 differential drop out, although follow-up analyses indicate no differences between those that dropped  
46  
47 379 and those that completed for age, BMI, or daily sedentary time.

48  
49  
50 380 The present study is among the first interventions conducted within the worksite aimed  
51  
52 381 specifically at reducing daily sedentary time to demonstrate between group differences in objectively  
53  
54 382 measured sedentary time. Compliance with the motivational website was high while compliance with  
55  
56 383 the pedal machine was moderate. These findings are promising considering the relatively low cost of  
57  
58 384 the intervention which cost a total of \$180 (pedal machine and software, pedometer, access to

1  
2 385 | [website\) per participant.](#) While an intervention effect was observed for waist circumference, no  
3  
4 386 between group differences were observed for any other cardiometabolic risk factors. More sedentary  
5  
6 387 focused interventions are needed to examine whether reducing sedentary time can be sustained  
7  
8 388 long-term and whether long-term changes result in significant reductions in risk for chronic diseases.  
9  
10  
11 389  
12  
13 390  
14

15 391 **Funding Source:** This study was funded by Oak Ridge Associated Universities grant #212112.  
16  
17 392

18  
19 393 **Competing Interests:** All authors have completed the ICMJE uniform disclosure form at  
20  
21 394 [www.icmje.org/coi\\_disclosure.pdf](http://www.icmje.org/coi_disclosure.pdf) and declare: no financial support from the funder Oak Ridge  
22  
23 395 Associated Universities for the submitted work, no financial relationships with any organizations that  
24  
25 396 might have an interest in the submitted work in the previous three years, and no other relationships or  
26  
27 397 activities that could appear to have influenced the submitted work.  
28  
29  
30

31 398 **Contributorship Statement:**  
32  
33  
34

- 35 399 • Dr. Lucas Carr was responsible for the design of the study and lead the manuscript  
36 400 preparation.
- 37 401 • Dr. Kristina Karvinen assisted in the design of the study and assisted in the manuscript  
38 402 preparation.
- 39 403 • Ms. Mallory Peavler contributed to the manuscript preparation and was solely responsible for  
40 404 leading the intervention which included duties of interacting with participants on a daily basis.
- 41 405 • Ms. Rebecca Smith and Ms. Kayla Cangelosi both contributed to the manuscript preparation  
42 406 and were responsible for collecting data at the baseline and post-intervention time points.  
43  
44  
45  
46  
47  
48  
49  
50  
51  
52

53 407 **Data Sharing**  
54 408

- 55 409 • Extra data is available by emailing Dr. Lucas Carr at [lucas-carr@uiowa.edu](mailto:lucas-carr@uiowa.edu).  
56 410  
57  
58  
59  
60

1  
2 411 **Figure Legend**  
3

4 412  
5  
6 413 **Figure 1.** Sequence of events and recruitment/enrollment schematic. Study was coordinated at East  
7  
8  
9 414 Carolina University, Greenville, NC, from June 2011-June 2012.  
10

11 415  
12  
13 416 **Figure 2.** Images of intervention features: A. Portable pedal machine, B. Pedal machine activity  
14  
15 417 tracking software screenshot, C. Pedal machine monitor feedback; D. Pedometer; and E. Screenshot  
16  
17 418 of the website homepage.  
18  
19 419  
20  
21 420  
22  
23 421  
24  
25 422  
26  
27 423  
28  
29 424  
30  
31 425  
32  
33 426  
34  
35 427  
36  
37 428  
38  
39 429  
40  
41 430  
42  
43 431  
44  
45 432  
46  
47 433  
48  
49 434  
50  
51 435  
52  
53 436  
54  
55 437  
56  
57 438  
58  
59 439  
60

1  
2 438  
3  
4 439  
5  
6 440  
7 441  
8 442  
9 443  
10 444  
11 445  
12 446  
13 447  
14 448  
15 449  
16 450  
17 451  
18 452  
19 453  
20 454  
21 455  
22 456  
23 457  
24 458  
25 459  
26 460  
27 461  
28 462  
29 463  
30 464  
31 465  
32 466  
33 467  
34 468  
35 469  
36 470  
37 471  
38 472  
39 473  
40 474  
41 475  
42 476  
43 477  
44 478  
45 479  
46 480  
47 481  
48 482  
49 483  
50 484  
51 485  
52 486  
53 487  
54 488  
55 489  
56 490  
57 491  
58 492  
59 493  
60

## REFERENCES

1. Warren TY, Barry V, Hooker SP, et al. Sedentary behaviors increase risk of cardiovascular disease mortality in men. *Med Sci Sports Exercise* 2010;42(5):879-85.
2. Thorp AA, Healy GN, Owen N, et al. Deleterious associations of sitting time and television viewing time with cardiometabolic risk biomarkers: Australian Diabetes, Obesity and Lifestyle (AusDiab) study 2004-2005. *Diabetes Care* 2010;33(2):327-34.
3. Roberts CK, Vaziri ND, Sindhu RK, et al. A high-fat, refined-carbohydrate diet affects renal NO synthase protein expression and salt sensitivity. *J Appl Physiol* 2003;94(3):941-6 .
4. Beunza JJ, Martinez-Gonzalez MA, Ebrahim S, et al. Sedentary behaviors and the risk of incident hypertension: the SUN Cohort. *Am J Hypertens* 2007;20(11):1156-62.
5. Ford ES, Kohl HW, 3rd, Mokdad AH, et al. Sedentary behavior, physical activity, and the metabolic syndrome among U.S. adults. *Obesity Res* 2005;13(3):608-14.
6. Must A, Tybor DJ. Physical activity and sedentary behavior: a review of longitudinal studies of weight and adiposity in youth. *Int J Obes (Lond)* 2005;29 Suppl 2:S84-96.
7. Dunstan DW, Kingwell BA, Larsen R, et al. Breaking up prolonged sitting reduces postprandial glucose and insulin responses. *Diabetes Care* 2012;35(5):976-83.
8. Duvivier BM, Schaper NC, Bremers MA, et al. Minimal intensity physical activity (standing and walking) of longer duration improves insulin action and plasma lipids more than shorter periods of moderate to vigorous exercise (cycling) in sedentary subjects when energy expenditure is comparable. *PLoS One* 2013;8(2):e55542.
9. Thorp AA, Healy GN, Winkler E, et al. Prolonged sedentary time and physical activity in workplace and non-work contexts: a cross-sectional study of office, customer service and call centre employees. *Int J Behav Nutr Phys Act* 2012;9:128.
10. Carr LJ, Walaska KA, Marcus BH. Feasibility of a portable pedal exercise machine for reducing sedentary time in the workplace. *Br J Sports Med* 2012;46(6):430-5.
11. McCrady SK, Levine JA. Sedentariness at work: how much do we really sit? *Obesity (Silver Spring)* 2009;17(11):2103-5.
12. Brownson RC, Boehmer TK, Luke DA. Declining rates of physical activity in the United States: what are the contributors? *Annu Rev Public Health* 2005;26:421-43.
13. Church TS, Thomas DM, Tudor-Locke C, et al. Trends over 5 decades in U.S. occupation-related physical activity and their associations with obesity. *PLoS One* 2011;6(5):e19657.
14. Conn VS, Hafdahl AR, Cooper PS, et al. Meta-analysis of workplace physical activity interventions. *American journal of preventive medicine* 2009;37(4):330-9.
15. Dishman RK, Oldenburg B, O'Neal H, et al. Worksite physical activity interventions. *Amer J Prev Med* 1998;15(4):344-61.
16. Stokols D, Pelletier KR, Fielding JE. The ecology of work and health: research and policy directions for the promotion of employee health. *Health Educ Q* 1996;23(2):137-58.
17. Chau JY, der Ploeg HP, van Uffelen JG, et al. Are workplace interventions to reduce sitting effective? A systematic review. *Prev Med* 2010;51(5):352-6.
18. Healy GN, Eakin EG, Lamontagne AD, et al. Reducing sitting time in office workers: Short-term efficacy of a multicomponent intervention. *Prev Med* 2013;57(1):43-8.
19. Evans RE, Fawole HO, Sheriff SA, et al. Point-of-choice prompts to reduce sitting time at work: a randomized trial. *Amer J Prev Med* 2012;43(3):293-7.
20. Alkhajah TA, Reeves MM, Eakin EG, et al. Sit-stand workstations: a pilot intervention to reduce office sitting time. *Amer J Prev Med* 2012;43(3):298-303.
21. Random.org. Random Sequence Generator. Secondary Random Sequence Generator 2011. <http://www.random.org/sequences/>.
22. Bandura, editor. *Social Foundations of Thought and Action: A Social Cognitive Theory*. Englewood Cliffs, NJ: Prentice-Hall, 1986.

- 1  
2 488 23. Mudge S, Taylor D, Chang O, et al. Test-retest reliability of the StepWatch Activity Monitor outputs  
3 489 in healthy adults. *J Phys Act Health* 2010;7(5):671-6.  
4 490 24. Foster RC, Lanningham-Foster LM, Manohar C, et al. Precision and accuracy of an ankle-worn  
5 491 accelerometer-based pedometer in step counting and energy expenditure. *Prev Med*  
6 492 2005;41(3-4):778-83.  
7 493 25. Carr LJ, Mahar MT. Accuracy of intensity and inclinometer output of three activity monitors for  
8 494 identification of sedentary behavior and light-intensity activity. *J Obes*; 2012;1-9.  
9 495 26. Rowe DA, Welk GJ, Heil DP, et al. Stride rate recommendations for moderate-intensity walking.  
10 496 *Med Sci Sports Exercise* 2011;43(2):312-8.  
11 497 27. ACSM. ACSM's Guidelines for Exercise Testing and Prescription. In: ACSM, ed. Seventh ed:  
12 498 Lippincott Williams & Wilkins, 2006.  
13 499 28. Issa JS, Strunz C, Giannini SD, et al. Precision and accuracy of blood lipid analyses by a portable  
14 500 device (Cholestech-LDX). *Arquivos brasileiros de cardiologia* 1996;66(6):339-42.  
15 501 29. Ebbeling CB, Ward A, Puleo EM, et al. Development of a single-stage submaximal treadmill  
16 502 walking test. *Med Sci Sports Exercise* 1991 23;8:966-73.  
17 503 30. Van Breukelen GJ. ANCOVA versus change from baseline: more power in randomized studies,  
18 504 more bias in nonrandomized studies [corrected]. *J Clin Epidemiol* 2006;59(9):920-5.  
19 505 31. Kozey-Keadle S, Libertine A, Staudenmayer J, et al. The Feasibility of Reducing and Measuring  
20 506 Sedentary Time among Overweight, Non-Exercising Office Workers. *J Obes* 2012:1-10.  
21 507 32. Owen N, Sparling PB, Healy GN, et al. Sedentary behavior: emerging evidence for a new health  
22 508 risk. *Mayo Clin Proc* 2010;85(12):1138-41.  
23 509 33. Rhodes RE, Mark RS, Temmel CP. Adult sedentary behavior: a systematic review. *Am J Prev*  
24 510 *Med* 2012;42(3):e3-28.  
25 511 34. Thorp AA, Owen N, Neuhaus M, et al. Sedentary behaviors and subsequent health outcomes in  
26 512 adults a systematic review of longitudinal studies, 1996-2011. *Am J Prev Med* 2011;41(2):207-  
27 513 15.  
28 514 35. Coutinho T, Goel K, Correa de Sa D, et al. Combining body mass index with measures of central  
29 515 obesity in the assessment of mortality in subjects with coronary disease: role of "normal  
30 516 weight central obesity". *J Am Coll Cardiol* 2013;61(5):553-60.  
31 517 36. Carr LJ, Bartee RT, Dorozynski C, et al. Internet-delivered behavior change program increases  
32 518 physical activity and improves cardiometabolic disease risk factors in sedentary adults: results  
33 519 of a randomized controlled trial. *Prev Med* 2008;46(5):431-8.  
34 520 37. Healy GN, Dunstan DW, Salmon J, et al. Breaks in sedentary time: beneficial associations with  
35 521 metabolic risk. *Diabetes Care* 2008;31(4):661-6 ..  
36 522 38. Spittaels H, De Bourdeaudhuij I, Vandelanotte C. Evaluation of a website-delivered computer-  
37 523 tailored intervention for increasing physical activity in the general population. *Prev Med*  
38 524 2007;44(3):209-17.  
39 525 39. Vandelanotte C, Spathonis KM, Eakin EG, et al. Website-delivered physical activity interventions  
40 526 a review of the literature. *Am J Prev Med* 2007;33(1):54-64.  
41 527 40. van den Berg MH, Ronday HK, Peeters AJ, et al. Engagement and satisfaction with an Internet-  
42 528 based physical activity intervention in patients with rheumatoid arthritis. *Rheumatology*  
43 529 (*Oxford, England*) 2007;46(3):545-52.  
44 530 41. Lewis B, Williams D, Dunsiger S, et al. User attitudes towards physical activity websites in a  
45 531 randomized controlled trial. *Prev Med* 2008;47(5):508-13.  
46 532 42. Proper KI, van der Beek AJ, Hildebrandt VH, et al. Short term effect of feedback on fitness and  
47 533 health measurements on self reported appraisal of the stage of change. *Br J Sports Med*  
48 534 2003;37(6):529-34.  
49 535 43. Bravata DM, Smith-Spangler C, Sundaram V, et al. Using pedometers to increase physical activity  
50 536 and improve health: a systematic review. *JAMA* 2007;298(19):2296-304.  
51 537  
52 538  
53  
54  
55  
56  
57  
58  
59  
60

1  
2  
3  
4  
5  
6  
7  
8  
9  
10  
11  
12  
13  
14  
15  
16  
17  
18  
19  
20  
21  
22  
23  
24  
25  
26  
27  
28  
29  
30  
31  
32  
33  
34  
35  
36  
37  
38  
39  
40  
41  
42  
43  
44  
45  
46  
47  
48  
49  
50  
51  
52  
53  
54  
55  
56  
57  
58  
59  
60

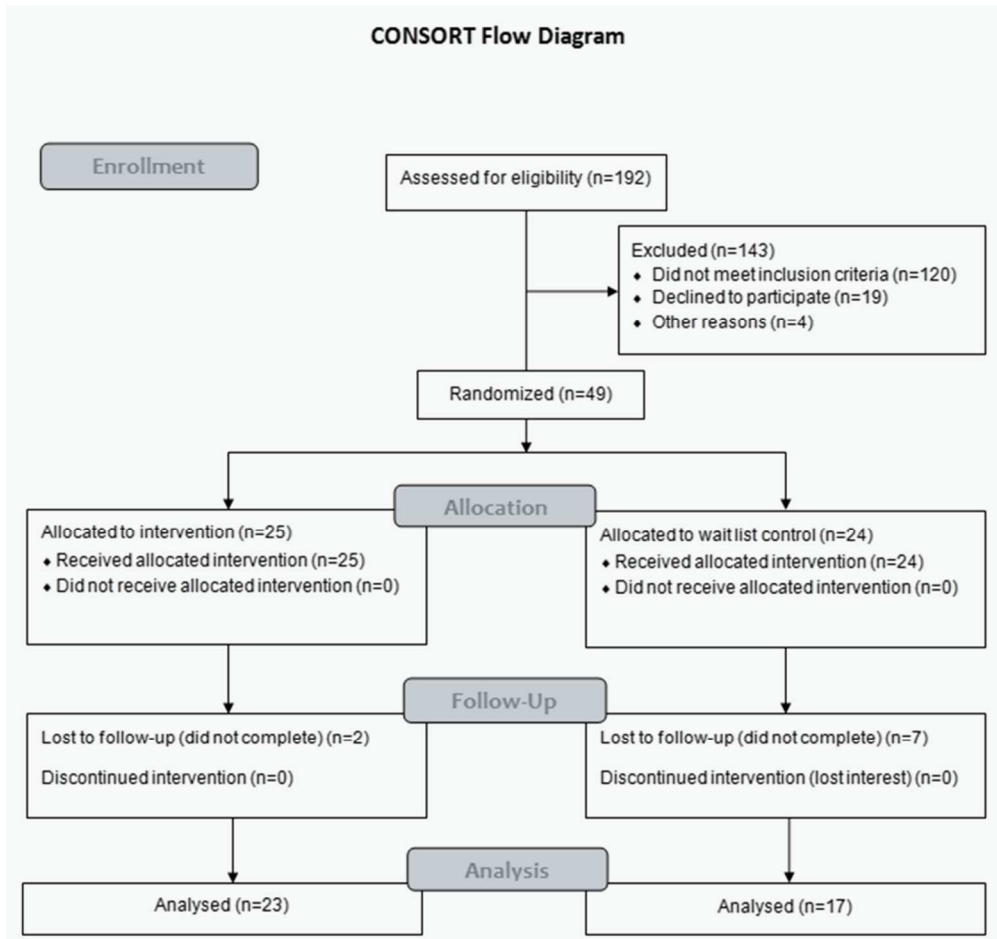

177x167mm (150 x 150 DPI)

only

1  
2  
3  
4  
5  
6  
7  
8  
9  
10  
11  
12  
13  
14  
15  
16  
17  
18  
19  
20  
21  
22  
23  
24  
25  
26  
27  
28  
29  
30  
31  
32  
33  
34  
35  
36  
37  
38  
39  
40  
41  
42  
43  
44  
45  
46  
47  
48  
49  
50  
51  
52  
53  
54  
55  
56  
57  
58  
59  
60

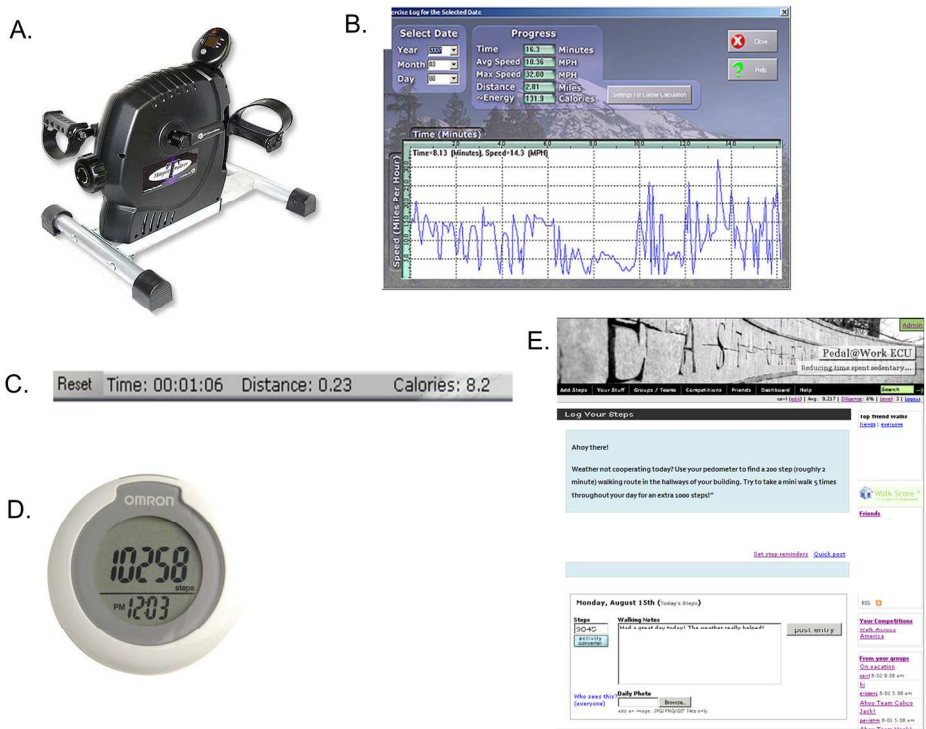

Figure 2. Images of intervention features: A. Portable pedal machine, B. Pedal machine activity tracking software screenshot, C. Pedal machine monitor feedback; D. Pedometer; and E. Screenshot of the website homepage.  
190x142mm (300 x 300 DPI)

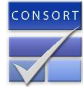

CONSORT 2010 checklist of information to include when reporting a randomised trial\*

| Section/Topic                    | Item No | Checklist item                                                                                                                                                                              | Reported on page No |
|----------------------------------|---------|---------------------------------------------------------------------------------------------------------------------------------------------------------------------------------------------|---------------------|
| <b>Title and abstract</b>        |         |                                                                                                                                                                                             |                     |
|                                  | 1a      | Identification as a randomised trial in the title                                                                                                                                           | 1                   |
|                                  | 1b      | Structured summary of trial design, methods, results, and conclusions (for specific guidance see CONSORT for abstracts)                                                                     | 2                   |
| <b>Introduction</b>              |         |                                                                                                                                                                                             |                     |
| Background and objectives        | 2a      | Scientific background and explanation of rationale                                                                                                                                          | 3-4                 |
|                                  | 2b      | Specific objectives or hypotheses                                                                                                                                                           | 4                   |
| <b>Methods</b>                   |         |                                                                                                                                                                                             |                     |
| Trial design                     | 3a      | Description of trial design (such as parallel, factorial) including allocation ratio                                                                                                        | 5                   |
|                                  | 3b      | Important changes to methods after trial commencement (such as eligibility criteria), with reasons                                                                                          | NA                  |
| Participants                     | 4a      | Eligibility criteria for participants                                                                                                                                                       | 4-5                 |
|                                  | 4b      | Settings and locations where the data were collected                                                                                                                                        | 7                   |
| Interventions                    | 5       | The interventions for each group with sufficient details to allow replication, including how and when they were actually administered                                                       | 5-6                 |
| Outcomes                         | 6a      | Completely defined pre-specified primary and secondary outcome measures, including how and when they were assessed                                                                          | 7                   |
|                                  | 6b      | Any changes to trial outcomes after the trial commenced, with reasons                                                                                                                       | NA                  |
| Sample size                      | 7a      | How sample size was determined                                                                                                                                                              | 8                   |
|                                  | 7b      | When applicable, explanation of any interim analyses and stopping guidelines                                                                                                                | NA                  |
| <b>Randomisation:</b>            |         |                                                                                                                                                                                             |                     |
| Sequence generation              | 8a      | Method used to generate the random allocation sequence                                                                                                                                      | 5                   |
|                                  | 8b      | Type of randomisation; details of any restriction (such as blocking and block size)                                                                                                         | 5                   |
| Allocation concealment mechanism | 9       | Mechanism used to implement the random allocation sequence (such as sequentially numbered containers), describing any steps taken to conceal the sequence until interventions were assigned | 5                   |
| Implementation                   | 10      | Who generated the random allocation sequence, who enrolled participants, and who assigned participants to interventions                                                                     | 5                   |



|    |                          |     |                                                                                                                                          |
|----|--------------------------|-----|------------------------------------------------------------------------------------------------------------------------------------------|
| 1  |                          |     |                                                                                                                                          |
| 2  | Blinding                 | 11a | If done, who was blinded after assignment to interventions (for example, participants, care providers, those assessing outcomes) and how |
| 3  |                          |     | 5&7                                                                                                                                      |
| 4  |                          | 11b | If relevant, description of the similarity of interventions                                                                              |
| 5  |                          |     | NA                                                                                                                                       |
| 6  | Statistical methods      | 12a | Statistical methods used to compare groups for primary and secondary outcomes                                                            |
| 7  |                          | 12b | Methods for additional analyses, such as subgroup analyses and adjusted analyses                                                         |
| 8  |                          |     | NA                                                                                                                                       |
| 9  | <b>Results</b>           |     |                                                                                                                                          |
| 10 | Participant flow (a      | 13a | For each group, the numbers of participants who were randomly assigned, received intended treatment, and                                 |
| 11 | diagram is strongly      |     | were analysed for the primary outcome                                                                                                    |
| 12 | recommended)             | 13b | For each group, losses and exclusions after randomisation, together with reasons                                                         |
| 13 |                          |     | 5                                                                                                                                        |
| 14 | Recruitment              | 14a | Dates defining the periods of recruitment and follow-up                                                                                  |
| 15 |                          | 14b | Why the trial ended or was stopped                                                                                                       |
| 16 |                          |     | 5                                                                                                                                        |
| 17 | Baseline data            | 15  | A table showing baseline demographic and clinical characteristics for each group                                                         |
| 18 | Numbers analysed         | 16  | For each group, number of participants (denominator) included in each analysis and whether the analysis was                              |
| 19 |                          |     | by original assigned groups                                                                                                              |
| 20 |                          |     | 5                                                                                                                                        |
| 20 | Outcomes and             | 17a | For each primary and secondary outcome, results for each group, and the estimated effect size and its                                    |
| 21 | estimation               |     | precision (such as 95% confidence interval)                                                                                              |
| 22 |                          | 17b | For binary outcomes, presentation of both absolute and relative effect sizes is recommended                                              |
| 23 |                          |     | NA                                                                                                                                       |
| 24 | Ancillary analyses       | 18  | Results of any other analyses performed, including subgroup analyses and adjusted analyses, distinguishing                               |
| 25 |                          |     | pre-specified from exploratory                                                                                                           |
| 26 |                          |     | 8-13                                                                                                                                     |
| 26 | Harms                    | 19  | All important harms or unintended effects in each group (for specific guidance see CONSORT for harms)                                    |
| 27 |                          |     | NA                                                                                                                                       |
| 28 | <b>Discussion</b>        |     |                                                                                                                                          |
| 29 | Limitations              | 20  | Trial limitations, addressing sources of potential bias, imprecision, and, if relevant, multiplicity of analyses                         |
| 30 | Generalisability         | 21  | Generalisability (external validity, applicability) of the trial findings                                                                |
| 31 | Interpretation           | 22  | Interpretation consistent with results, balancing benefits and harms, and considering other relevant evidence                            |
| 32 |                          |     | 13-16                                                                                                                                    |
| 33 | <b>Other information</b> |     |                                                                                                                                          |
| 34 | Registration             | 23  | Registration number and name of trial registry                                                                                           |
| 35 |                          |     | ClinicalTrials.                                                                                                                          |
| 36 |                          |     | gov                                                                                                                                      |
| 37 |                          |     | (NCT0137108                                                                                                                              |
| 38 |                          |     | 4)                                                                                                                                       |
| 39 | Protocol                 | 24  | Where the full trial protocol can be accessed, if available                                                                              |
| 40 |                          |     | Oak Ridge                                                                                                                                |
| 41 |                          |     | Associated                                                                                                                               |
| 42 |                          |     | Universities                                                                                                                             |

Grant  
(#212112)

Funding 25 Sources of funding and other support (such as supply of drugs), role of funders

\*We strongly recommend reading this statement in conjunction with the CONSORT 2010 Explanation and Elaboration for important clarifications on all the items. If relevant, we also recommend reading CONSORT extensions for cluster randomised trials, non-inferiority and equivalence trials, non-pharmacological treatments, herbal interventions, and pragmatic trials. Additional extensions are forthcoming: for those and for up to date references relevant to this checklist, see [www.consort-statement.org](http://www.consort-statement.org).

For peer review only

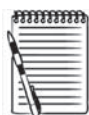

PRESS  
RELEASE

# Feasibility of a portable pedal exercise machine for reducing sedentary time in the workplace

Lucas J Carr,<sup>1,2</sup> Kristen A Walaska,<sup>1</sup> Bess H Marcus<sup>1,3</sup>

<sup>1</sup>Centers for Behavioral and Preventive Medicine, The Miriam Hospital, Providence, Rhode Island, USA

<sup>2</sup>Department of Exercise and Sport Science, East Carolina University, Greenville, North Carolina, USA

<sup>3</sup>Program in Public Health, Brown University, Providence, Rhode Island, USA

## Correspondence to

Dr Lucas J Carr, Department of Exercise and Sport Science, East Carolina University, 172 Minges Coliseum, Greenville, NC 27858, USA; [carrlj@ecu.edu](mailto:carrlj@ecu.edu)

Accepted 3 December 2010

## ABSTRACT

**Background** Sedentary time is independently associated with an increased risk of metabolic disease. Worksite interventions designed to decrease sedentary time may serve to improve employee health.

**Objective** The purpose of this study is to test the feasibility and use of a pedal exercise machine for reducing workplace sedentary time.

**Methods** Eighteen full-time employees (mean age+SD 40.2+10.7 years; 88% female) working in sedentary occupations were recruited for participation. Demographic and anthropometric data were collected at baseline and 4 weeks. Participants were provided access to a pedal exercise machine for 4 weeks at work. Use of the device was measured objectively by exercise tracking software, which monitors pedal activity and provides the user real-time feedback (eg, speed, time, distance, calories). At 4 weeks, participants completed a feasibility questionnaire.

**Results** Participants reported sitting 83% of their working days. Participants used the pedal machines an average of 12.2+6.6 out of a possible 20 working days and pedalled an average of 23.4+20.4 min each day used. Feasibility data indicate that participants found the machines feasible for use at work. Participants also reported sedentary time at work decreased due to the machine.

**Discussion** Findings from this study suggest that this pedal machine may be a feasible tool for reducing sedentary time while at work. These findings hold public health significance due to the growing number of sedentary jobs in the USA and the potential of the device for use in large-scale worksite health programmes.

The health-related benefits of regular moderate and vigorous intensity physical activity have been well established.<sup>1-3</sup> Conversely, physical inactivity is a leading preventable cause of death and all-cause mortality,<sup>4</sup> and has been referred to as one of the most important public health problems of the 21st century.<sup>5</sup> Within the realm of physical inactivity, researchers of the past decade have explored more specifically the health implications and associated health mechanisms of 'sedentary behaviour'.<sup>6</sup> Recent reviews have defined sedentary behaviour as 'activities that do not increase energy expenditure substantially above resting levels' and include activities such as lying down, sitting and using screen-based technologies such as televisions and computers.<sup>7,8</sup> Interestingly, even short bouts of reduced energy expenditure have been associated with substantial detriments to metabolic health in animals models.<sup>9-12</sup> Emerging studies with humans seem to corroborate such

findings, as time spent being sedentary has been demonstrated to be independently associated with an increased risk of metabolic diseases.<sup>13</sup> Furthermore, sedentary time in the form of sitting has been associated with an increased likelihood of being overweight/obese.<sup>14</sup> Conversely, evidence supports breaking up prolonged bouts of sedentary time as a means of improving metabolic risk factors such as body mass index (BMI), waist circumference, fasting glucose levels and triglyceride levels.<sup>15</sup>

The workplace has been identified as an ideal setting for reducing sedentary time as full-time employees working a 40 h work week spend over a third of their weekly wakeful hours at work. In addition, working days are associated with less standing time and more time sitting time compared with non-work days,<sup>16</sup> and evidence suggests occupational activity as a whole is on the decline with high physical activity occupations decreasing while low activity occupations have risen steadily over the past half century.<sup>17,18</sup>

Previous worksite programmes aimed at increasing employees' physical activity have demonstrated efficacy for increasing physical activity, with some demonstrating improvements in worksite-specific outcomes such as attendance and job stress.<sup>19,20</sup> Past worksite physical activity interventions have taken many approaches for promoting physical activity, including promoting stair use through point of decision prompts, promoting active transport and providing access to worksite fitness facilities.<sup>21,22</sup> It could be argued, however, that many of these approaches are somewhat limited with regard to their reach and impact in that they do not target the large portion of time in which the typical desk/computer-dependent employee is working and therefore sedentary. With the rise in screen-based technologies in the worksite, computer use, an identified barrier to physical activity,<sup>23</sup> has become a staple of the typical work day. Still, few worksite intervention approaches have focused specifically on reducing the sitting time of sedentary employees for improving health.<sup>24</sup> Furthermore, no worksite interventions to date have attempted to reduce sedentary time while adapting to the typical computer work environment in which sitting is necessary.

Thompson *et al*<sup>25</sup> recently tested the feasibility of a walking workstation designed to allow employees to continue their work while being active. Hospital employees in four different occupations were recruited for participation. While using the walking workstations, participants increased daily walking by an average of 2000

For peer review only - <http://bmjopen.bmj.com/site/about/guidelines.xhtml>

## Original article

steps or an equivalent of 100 kcal/day.<sup>26</sup> Participants also reported that they could perform normal work tasks (ie, computer work, professional phone calls) while using the device and declines in productivity were not reported to be an issue. However, such devices do have limitations that might prohibit widespread use such as high cost, size requirements that may not be met in small offices, lack of portability and lack of use for special needs populations such as those with orthopaedic limitations or joint pain.

McAlpine *et al*<sup>27</sup> conducted a study testing the energy expenditure of an office stepping device that seemingly addressed several of the feasibility limitations of the walking workstation. The device used in their study was portable, cost feasible, nearly silent and when attached to a personal computer (PC) connected accelerometer allowed for self-monitoring. While the stepping device did result in significant increases in energy expenditure above sitting in a controlled laboratory setting, the study did not explore the feasibility of the device in a real-life setting.

Several portable pedal exercise machines that also address many of the limitations of the walking workstation have recently become commercially available. One machine in particular, the MagneTrainer mini exercise bike (3D Innovations, LLC, Greeley, CO) is a cost feasible, stable yet portable device that can be set up in front of most standard office chairs for use while sitting and also allows for objective self-monitoring (eg, time used, distance pedalled, average speed, caloric expenditure) through a PC connection. To our knowledge, no studies have explored the feasibility or use of a portable pedal machine for reducing time spent sedentary in an occupational setting. Therefore, the primary aims of this study are to test the feasibility, acceptability and use of a portable, pedal exercise machine for reducing sedentary time in a free-living, occupationally sedentary adult population. We hypothesise that participants will find the machines feasible and acceptable for use in the sedentary work environment, and that participants will decrease their sedentary time at work as a result of using the pedal machine.

## METHODS

## Subjects

A total of 18 healthy, adult, (age 40.2+10.7 years; BMI 26.7+5.0 kg/m<sup>2</sup>; 88% female) full-time employees (self-report working a minimum of 35 h/week) working in sedentary (minimum

of 75% of working day spent sitting), desk/computer-dependent occupations were recruited from the greater Providence, Rhode Island, region for participation by local internet advertisements. Assessments occurred between October 2009 and March 2010. Participants were devoid of ambulatory/exercise limitations, and free from overt cardiovascular, metabolic, respiratory or neurological diseases as assessed by medical history screening. Participants were compensated US\$15 each time they attended two separate assessment sessions (total of US\$30 possible). Experimental protocols were approved by the Lifespan Office of Research Administration in Providence, Rhode Island, and voluntary informed consent was obtained from each participant.

## Experimental design

All testing assessments were conducted at a research laboratory located at the Miriam Hospital in Providence, Rhode Island, USA. Participants were asked to attend two testing sessions, one at baseline and a follow-up assessment 4 weeks later. Body mass was measured to the nearest 0.1 kg and height to the nearest 0.5 cm using a calibrated medical balance beam scale (Detecto, Webb City, Missouri, USA). BMI (kg/m<sup>2</sup>) was calculated as weight (kg) divided by height (m) squared. Participants completed a modified version of the 7-day physical activity recall questionnaire,<sup>28</sup> which included supplementary questions targeting the total number of hours and minutes spent 'sitting', 'standing but not walking' and 'walking' while at work over the previous 4 weeks. Participants then completed a 6-min pedal test following the Astrand-Rhyming protocol<sup>29</sup> to become familiarised with the pedal machine.

Participants were then provided access to a MagneTrainer pedal exercise machine (3D Innovations) for use while at work for four continuous weeks (figure 1). The MagneTrainer pedal exercise machine was chosen due to its relatively low cost (US\$150 for pedal machine and software), portability and compact size (18 in height, 20 in length) and its ability to monitor and record participant's daily and accumulated pedalling activity objectively through a PC connection (FitXF Exercise Tracking Software; 3D Innovations). The FitXF software also provides users with real-time feedback on pedal speed, time used, distance and calories, which is displayed on their computer monitor. The FitXF software also begins recording pedal activity the moment the user begins pedalling and stores daily and accumulated summary data for total time spent pedalling



**Figure 1** (A) The portable pedal exercise machine. (B) A screenshot of the exercise log, which provides feedback on pedal use activity per day. (C) A screenshot of the real-time monitor, which provides real-time feedback to the user.

For peer review only - <http://bmjopen.bmj.com/site/about/guidelines.xhtml>

(min/day), average speed (mph/day), distance pedalled (miles/day) and estimated caloric expenditure (kcal/day). A member of the research team delivered the pedal machine to the participant's worksite, downloaded the FitXF software to the participant's work computer and worked with the participant to identify the most feasible physical set up for using the machine (eg, under the desk, next to the desk). All participants were required to gain clearance from their immediate supervisor before enrolling in the study.

Following 4 weeks, pedalling activity data were downloaded from each participant's personal work computer with the authorisation of the participant's supervisor. Participants then returned to the testing facility to repeat all baseline tests and to complete a 23-item, five-point Likert scale (1, strongly disagree; 2, disagree; 3, neutral; 4, agree; 5, strongly agree) feasibility/acceptability questionnaire designed to enquire about the user's opinions and experiences with the machine (see appendix 1) as well as the intensity at which they typically pedalled using the Borg 0–10 rating of perceived exertion (RPE) scale.<sup>30</sup> Participants were also asked to report any barriers to using the machine and/or suggested improvements for the machine while at work. Consistent with the purpose of testing the feasibility and acceptability of the pedal machine, participants were only provided access to the machine and were not provided any behavioural intervention materials for the purpose of reducing sedentary time (eg, goals, motivational resources, self-monitoring prompts) during the course of the study.

### Statistical analyses

Minutes of pedalling activity and days of pedalling activity were recorded and downloaded from the pedal machine through the FitXF exercise tracking software. Means and SD of pedal use activity were calculated and are presented in table 1. Medians and quartiles of the feasibility/acceptability data were calculated and are presented in table 2. Means and SD of average pedal time per day used for each participant were calculated and are presented in figure 2. Average pedal time among all users on days 1–20 and compliance using the pedal machine (percentage participants that pedalled each day during days 1–20) was summarised and is presented in figure 3. Paired t tests were conducted to test whether participants' time spent sitting, standing and/or walking changed over time from the baseline to the 4-week assessment. Statistical significance was set a priori at  $p < 0.05$ .

### RESULTS

On average, participants were middle aged (mean  $40.2 \pm 10.7$  years), overweight (mean BMI  $26.8 \pm 5.0$  kg/m<sup>2</sup>) and primarily

female (88%). Participants self-reported working an average of  $40.9 \pm 4.7$  h/week. Participants reported sitting an average of  $6.80 \pm 1.5$  h (83%) of their total working day. Participants pedalled an average of  $12.2 \pm 6.6$  (range 2–20 days) out of a possible 20 working days in which they had access to the pedal machine (61% compliance) and pedalled an average of  $23.4 \pm 20.4$  min on days they used the machine (see table 1 and figure 2). The estimated averages provided by the FitXF software for distance pedalled per day and caloric expenditure per day per participant equalled  $4.8 \pm 3.6$  miles/day and  $186.5 \pm 142.2$  kcal/day, respectively. Participants self-reported pedalling at an average intensity of  $4.4 \pm 1.6$  or 'somewhat hard' on the Borg 0–10 RPE scale. Average pedal time was maintained over the duration of the study, whereas the number of participants who used the machines each day (compliance) declined progressively over the course of 4 weeks (figure 3). As presented in table 2, when asked to respond to several statements pertaining to their experience with the pedal machine using a 1–5 Likert scale (1, strongly disagree; 5, strongly agree), participants reported the pedal machine to be 'easy to use', and 'as an alternative activity during bad weather'. Participants overwhelmingly reported they would 'use the pedal machine regularly at work if offered one by their employer' and reported neither their 'work productivity' nor their 'quality of work' declined as a result of using the machine at work. Participants reported 'their sedentary time at work decreased as a result of using the machine'. However, no significant differences in self-reported time spent sitting ( $p = 0.11$ ), standing ( $p = 0.65$ ) and/or walking ( $p = 0.77$ ) were observed from baseline to 4 weeks.

### DISCUSSION

Findings from this study suggest this portable pedal exercise machine is a feasible tool for reducing time spent sedentary while at work. Overall, participants reported positive experiences with the pedal machine and reported that they would use the machine at work if offered one by their employer. When provided access to the device, on average participants used the machines more than half of all working days although compliance did decrease over the course of the 4 weeks (see figure 3). This is not a surprising finding given the lack of any behavioural intervention provided to these previously sedentary participants during the course of the study. However, the average minutes pedalled per day was maintained throughout the 4 weeks and participants pedalled for an amount of time (23 min per day used) that could result in health benefits if performed on a regular basis and at an average intensity reported by participants (eg, 'somewhat hard' on the Borg 0–10 scale).<sup>3</sup> A logical next step would be to test the efficacy of combining the pedal machine with a behavioural intervention for reduc-

**Table 1** Accumulated and daily means  $\pm$  SD and ranges of pedal time, pedal speed, distance pedalled and caloric expenditure

|                                             | Mean $\pm$ SD       | Range       |
|---------------------------------------------|---------------------|-------------|
| Average total pedal time (min)              | 358.0 $\pm$ 401.7   | 4.0–1489.0  |
| Average number days pedalled                | 12.2 $\pm$ 6.6      | 2.0–20.0    |
| Average pedal time/day used (min)           | 23.4 $\pm$ 20.4     | 1.2–73.1    |
| Average pedal speed (mph)                   | 12.5 $\pm$ 4.4      | 5.3–18.4    |
| Average distance pedalled (miles)           | 69.0 $\pm$ 62.6     | 0.5–214.0   |
| Average distance pedalled/day used (miles)  | 4.8 $\pm$ 3.6       | 0.3–13.4    |
| Average total kcal expended (kcal)          | 2758.8 $\pm$ 2699.7 | 18.0–8334.8 |
| Average total kcal expended/day used (kcal) | 186.5 $\pm$ 142.2   | 9.0–501.9   |

Data were downloaded using the FitXF exercise tracking software.

For peer review only - <http://bmjopen.bmj.com/site/about/guidelines.xhtml>

## Original article

**Table 2** Quartile and median Likert scale responses (1, strongly disagree; 2, disagree; 3, neutral; 4, agree; 5, strongly agree) to feasibility/acceptability questions following 4 weeks of access to the pedal machine

| Do you agree or disagree with the following statement?                    | Q1  | Median | Q3  |
|---------------------------------------------------------------------------|-----|--------|-----|
| If offered to me by my employer, I would use the machine while at work    | 4.3 | 5.0    | 5.0 |
| My physical activity increased while at work as a result of the machine   | 3.0 | 4.0    | 5.0 |
| My physical activity increased outside of work as a result of the machine | 2.3 | 3.0    | 4.0 |
| The pedal machine is easy to use                                          | 4.0 | 4.0    | 5.0 |
| I would use the machine as an alternative activity in bad weather         | 4.0 | 5.0    | 5.0 |
| I am comfortable using the machine in the presence of others              | 3.0 | 4.0    | 5.0 |
| The time I spent sedentary at work decreased as a result of the machine   | 3.0 | 4.0    | 4.0 |
| I would use the machine while at home                                     | 4.0 | 5.0    | 5.0 |
| The machine is too noisy                                                  | 1.0 | 1.0    | 2.0 |
| My work-related productivity decreased while using the machine            | 1.0 | 1.0    | 2.8 |
| The quality of my work decreased while using the machine                  | 1.0 | 1.0    | 2.0 |
| The machine interfered with my daily work-related tasks                   | 1.0 | 1.0    | 2.0 |
| I was more tired on days I used the machine                               | 1.0 | 2.0    | 2.0 |
| I had more back pain on days I used the machine                           | 1.0 | 1.5    | 2.0 |
| I had more joint pain on days I used the machine                          | 1.0 | 1.0    | 2.0 |
| I had more muscle aches on days I used the machine                        | 1.0 | 1.5    | 2.0 |
| I could conduct a professional telephone call while using the machine     | 2.0 | 3.0    | 5.0 |
| I could conduct normal computer tasks while using the machine             | 2.0 | 3.0    | 4.0 |
| I could read comfortably while using the machine                          | 4.0 | 4.0    | 5.0 |
| The real-time monitor increased my use of the machine                     | 3.3 | 4.0    | 5.0 |

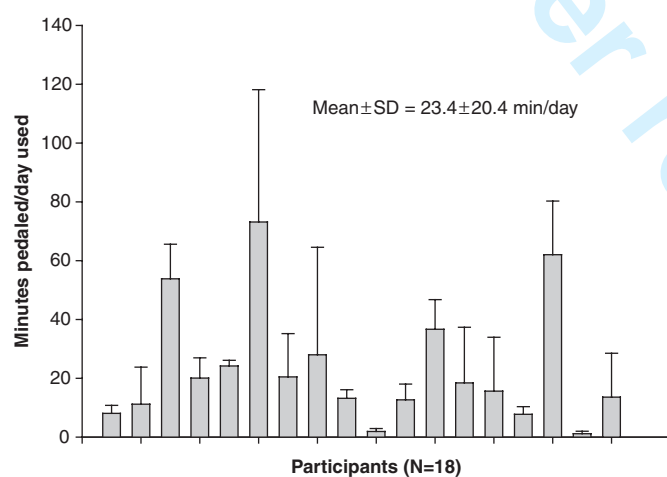**Figure 2** Average pedal time for days pedal machine was used per participant (N=18).

ing sedentary time at work and reducing the risk of chronic diseases.

When examining the pedal machine used from a human factors perspective, the MagneTrainer offers several features that make it a particularly attractive tool for future health promotion studies. Importantly, the device offers functions that are directly in line with three out of four features previously identified as necessary for technologies designed to promote physical activity and reduce sedentary time.<sup>31</sup> It is suggested that such technologies should: (1) give users proper credit for activities completed; (2) provide users personal awareness of his or her activity levels; (3) consider the practical constraints of users; and (4) support social influence.<sup>31</sup>

First, through the PC connection, the MagneTrainer pedal machine automatically and objectively monitors participants' pedalling activity (eg, credits user for activity completed). This function would be especially important from an assessment perspective in future research studies, and could potentially

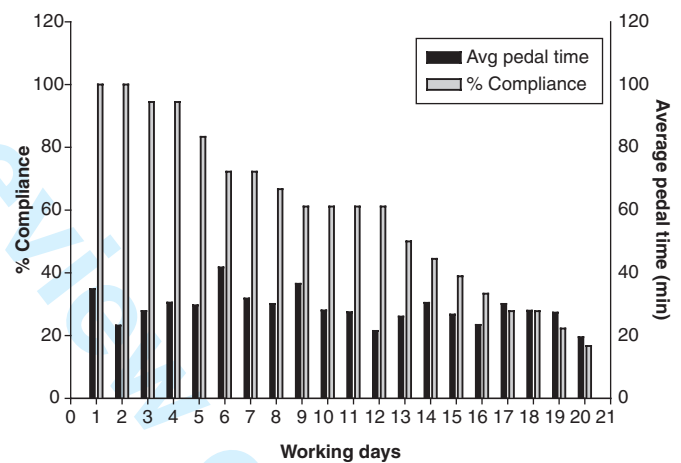**Figure 3** Average pedal time (minutes) and percentage of participants who pedaled each working day.

serve as a means to monitor employee participation in work-site wellness programmes that offer financial incentives for participation.

Second, the software enabled real-time feedback monitor and progress monitor, which summarises past activity by day and provides the user with a personal awareness of his or her current and past activity levels. The pedal machine provides users with real-time feedback of time spent pedalling (minutes), average speed (mph), maximum speed (mph), distance pedalled (miles) and estimated calories burned (kcal), which is displayed on a thin monitor that can be moved anywhere on the user's desktop. When asked to report how often they self-monitored their pedalling activity using the real-time feedback monitor (eg, time, distance, calories, speed) using a 1–4 Likert scale (1, never; 2, rarely; 3, occasionally; 4, frequently), participants reported frequently using the monitor (3.7+0.9). In addition, participants agreed the monitor increased their use of the machine (4.0+0.9 on 5-point Likert scale) suggesting that the monitor is a motivational tool.

For peer review only - <http://bmjopen.bmj.com/site/about/guidelines.xhtml>

### What is already known on this topic

Evidence of the negative impact prolonged sedentary time has on metabolic health is growing. Many new devices with the potential to reduce prolonged sedentary time have recently become available on the commercial market. However, few studies have tested the feasibility and use of such devices among free-living populations in the work environment.

### What this study adds

This study demonstrates a portable pedal exercise machine (MagneTrainer) to be feasible for use in the sedentary work environment. This study also found participants used the machines regularly without being provided a behavioural intervention. This study supports future interventions that test the efficacy of combining such devices with evidence-based behavioural approaches to reduce sedentary time at work.

Third, the portability, stability and near silent operation of the pedal machine allows this machine to be used in most typical office settings without interfering with daily operations. Importantly, portable pedal machines may serve as a tool to reduce sedentary time in the work environment without necessarily influencing the sitting time necessary for performing computer-related tasks. Participants reported the machine to be quiet, easy to use and usable in a typical office. Participants also reported that the pedal machine did not interfere with their quality of work or work productivity and did not result in any added pain to their joints or back. Participants agreed that they could read while using the pedal machine but not all users agreed they could complete computer tasks. Such practical considerations are important to consider for future worksite programmes that use the pedal machine.

Finally, while the pedal machine does not necessarily support social influence, previous worksite physical activity promotion studies using pedometers have utilised a social support component with great success.<sup>32</sup> Therefore, it stands to reason that the pedal machine could stimulate social support in the same light. In addition, our staff received 166 emails from interested participants in less than 72 h following an advertisement posted on the Lifespan hospital intranet website. The overwhelming response to this study is indicative of sedentary employees' desire to become more active while at work.

The results of this study should be interpreted with caution as this study is limited by a sample of primarily educated, Caucasian (94%) women (89%). It is possible that the pedal machine may not be viewed as favourably by men, racial and ethnic minority populations and/or individuals working in non-desk-dependent occupations. For example, individuals working in jobs that do not require a specific office space would probably not benefit from this machine. In addition, simply providing access to devices like the pedal machine is not enough to stimulate long-term use. The novelty of this device appeared to wear off over time, and may benefit from a

combination of evidence-based behavioural techniques such as regular email prompts for sustained use. Future interventions testing the efficacy of combining behavioural content with the pedal machine are warranted. Finally, the pedal machine used in this study has certain limitations that deserve mention. For instance, the accuracy of the caloric expenditure output has yet to be confirmed.

Collectively, these findings hold public health significance due to the growing number of sedentary jobs in the USA, our growing understanding of the costs sedentary behaviour has on our health, and the potential of portable pedal machines (eg, portable, low cost, objective monitoring) for use in large-scale worksite health programmes. Future physical activity promotion interventions utilising portable and practical devices such as the pedal machine are warranted.

**Contributors** The contributing authors have made substantial contributions to the conception, design, analysis and interpretation of data, drafting of the article and have all given final approval of the current version and agree to its submission.

**Acknowledgements** The authors would like to acknowledge the efforts of Ms Kristle Robles for her work in the data collection process.

**Funding** This study was funded in part by NIH grant 1T32HL076134.

**Competing interests** None.

**Patient consent** Obtained.

**Ethics approval** This study was conducted with the approval of the Miriam Hospital, Providence, Rhode Island, USA.

**Provenance and peer review** Not commissioned; externally peer reviewed.

### REFERENCES

1. Lee IM, Skerrett PJ. Physical activity and all-cause mortality: what is the dose-response relation? *Med Sci Sports Exerc* 2001;**33**(6 Suppl):S459–71.
2. Blair SN, Cheng Y, Holder JS. Is physical activity or physical fitness more important in defining health benefits? *Med Sci Sports Exerc* 2001;**33**(6 Suppl):S379–99.
3. Blair SN, Kohl HW, Gordon NF, et al. How much physical activity is good for health? *Annu Rev Public Health* 1992;**13**:99–126.
4. Mokdad AH, Marks JS, Stroup DF, et al. Actual causes of death in the United States, 2000. *JAMA* 2004;**291**:1238–45.
5. Blair SN. Physical inactivity: the biggest public health problem of the 21st century. *Br J Sports Med* 2009;**43**:1–2.
6. Owen N, Leslie E, Salmon J, et al. Environmental determinants of physical activity and sedentary behavior. *Exerc Sport Sci Rev* 2000;**28**:153–8.
7. Owen N, Healy GN, Matthews CE, et al. Too much sitting: the population health science of sedentary behavior. *Exerc Sport Sci Rev* 2010;**38**:105–13.
8. Pate RR, O'Neill JR, Lobelo F. The evolving definition of 'sedentary'. *Exerc Sport Sci Rev* 2008;**36**:173–8.
9. Booth FW, Laye MJ, Lees SJ, et al. Reduced physical activity and risk of chronic disease: the biology behind the consequences. *Eur J Appl Physiol* 2008;**102**:381–90.
10. Laye MJ, Rector RS, Borengasser SJ, et al. Cessation of daily wheel running differentially alters fat oxidation capacity in liver, muscle, and adipose tissue. *J Appl Physiol* 2009;**106**:161–8.
11. Laye MJ, Rector RS, Warner SO, et al. Changes in visceral adipose tissue mitochondrial content with type 2 diabetes and daily voluntary wheel running in OLETF rats. *J Physiol (Lond)* 2009;**587**:3729–39.
12. Laye MJ, Thyfault JP, Stump CS, et al. Inactivity induces increases in abdominal fat. *J Appl Physiol* 2007;**102**:1341–7.
13. Healy GN, Wijndaele K, Dunstan DW, et al. Objectively measured sedentary time, physical activity, and metabolic risk: the Australian Diabetes, Obesity and Lifestyle Study (AusDiab). *Diabetes Care* 2008;**31**:369–71.
14. Brown WJ, Miller YD, Miller R. Sitting time and work patterns as indicators of overweight and obesity in Australian adults. *Int J Obes Relat Metab Disord* 2003;**27**:1340–6.
15. Healy GN, Dunstan DW, Salmon J, et al. Breaks in sedentary time: beneficial associations with metabolic risk. *Diabetes Care* 2008;**31**:661–6.
16. McCrady SK, Levine JA. Sedentariness at work: how much do we really sit? *Obesity (Silver Spring)* 2009;**17**:2103–5.
17. Brownson RC, Boehmer TK, Luke DA. Declining rates of physical activity in the United States: what are the contributors? *Annu Rev Public Health* 2005;**26**:421–43.

## Original article

18. **Knuth AG**, Hallal PC. Temporal trends in physical activity: a systematic review. *J Phys Act Health* 2009;**6**:548–59.
19. **Conn VS**, Valentine JC, Cooper HM. Interventions to increase physical activity among aging adults: a meta-analysis. *Ann Behav Med* 2002;**24**:190–200.
20. **Dugdill L**, Brettle A, Hulme C, *et al*. Workplace physical activity interventions: a systematic review. *J Workplace Health Manage* 2008;**1**:20–40.
21. **Matson-Koffman DM**, Brownstein JN, Neiner JA, *et al*. A site-specific literature review of policy and environmental interventions that promote physical activity and nutrition for cardiovascular health: what works? *Am J Health Promot* 2005;**19**:167–93.
22. **Soler RE**, Leeks KD, Buchanan LR, *et al*. Point-of-decision prompts to increase stair use. A systematic review update. *Am J Prev Med* 2010;**38**(2 Suppl):S292–300.
23. **Fotheringham MJ**, Wonnacott RL, Owen N. Computer use and physical inactivity in young adults: public health perils and potentials of new information technologies. *Ann Behav Med* 2000;**22**:269–75.
24. **Chau JY**, der Ploeg HP, van Uffelen JG, *et al*. Are workplace interventions to reduce sitting effective? A systematic review. *Prev Med* 2010;**51**:352–6.
25. **Thompson WG**, Foster RC, Eide DS, *et al*. Feasibility of a walking workstation to increase daily walking. *Br J Sports Med* 2008;**42**:225–8.
26. **Levine JA**, Miller JM. The energy expenditure of using a 'walk-and-work' desk for office workers with obesity. *Br J Sports Med* 2007;**41**:558–61.
27. **McAlpine DA**, Manohar CU, McCrady SK, *et al*. An office-place stepping device to promote workplace physical activity. *Br J Sports Med* 2007;**41**:903–7.
28. **Blair SN**, Haskell WL, Ho P, *et al*. Assessment of habitual physical activity by a seven-day recall in a community survey and controlled experiments. *Am J Epidemiol* 1985;**122**:794–804.
29. American College of Sports Medicine. *ACSM's guidelines for exercise testing and prescription*. 7th edn. Lippincott Williams and Wilkins, 2006, Baltimore, MD.
30. **Borg G**. Ratings of perceived exertion and heart rates during short-term cycle exercise and their use in a new cycling strength test. *Int J Sports Med* 1982;**3**:153–8.
31. **Consolvo S**, Everitt K, Smith I, *et al*. *Designing for tangible interactions. Proceedings of Conference on Human Factors in Computing Systems*, April 24–27, 2006, Montréal, QC. doi: 10.1145/1124772.1124840.
32. **Wing RR**, Pinto AM, Crane MM, *et al*. A statewide intervention reduces BMI in adults: Shape Up Rhode Island results. *Obesity (Silver Spring)* 2009;**17**:991–5.

## Appendix 1 Feasibility questionnaire

|                                                                                                 | Strongly disagree | Disagree | Neutral | Agree | Strongly agree |
|-------------------------------------------------------------------------------------------------|-------------------|----------|---------|-------|----------------|
| 1. The pedal machine is easy to use                                                             |                   |          |         |       |                |
| 2. The pedal machine could be used in the typical office-style work environment                 |                   |          |         |       |                |
| 3. The pedal machine is too noisy                                                               |                   |          |         |       |                |
| 4. I would use the pedal machine as an alternative to be active on days that the weather is bad |                   |          |         |       |                |
| 5. I felt comfortable using the pedal machine in the presence of others at my work              |                   |          |         |       |                |
| 6. My work-related productivity decreased while using the pedal machine                         |                   |          |         |       |                |
| 7. The quality of my work decreased while using the pedal machine                               |                   |          |         |       |                |
| 8. The pedal machine interfered with my daily work-related tasks                                |                   |          |         |       |                |
| 9. I could conduct a normal, professional telephone conversation while using the pedal machine  |                   |          |         |       |                |
| 10. I could conduct normal computer-related tasks while using the pedal machine                 |                   |          |         |       |                |
| 11. I could read comfortably while using the pedal machine                                      |                   |          |         |       |                |
| 12. I was more tired on days I used the pedal machine                                           |                   |          |         |       |                |
| 13. I had more back pain on days I used the pedal machine                                       |                   |          |         |       |                |
| 14. I had more joint pain on days I used the pedal machine                                      |                   |          |         |       |                |
| 15. I had more muscle aches on days I used the pedal machine                                    |                   |          |         |       |                |
| 16. My physical activity increased while at work as a result of the pedal machine               |                   |          |         |       |                |
| 17. The time I spent being sedentary decreased while at work as a result of the pedal machine   |                   |          |         |       |                |
| 18. My physical activity increased outside of work as a result of the pedal machine             |                   |          |         |       |                |
| 19. If I were offered a pedal machine by my employer, I would use it while at work              |                   |          |         |       |                |
| 20. I would use the pedal machine while at home                                                 |                   |          |         |       |                |
| 21. The real-time monitor increased my use of the pedal machine                                 |                   |          |         |       |                |





## Feasibility of a portable pedal exercise machine for reducing sedentary time in the workplace

Lucas J Carr, Kristen A Walaska and Bess H Marcus

*Br J Sports Med* published online February 14, 2011  
doi: 10.1136/bjasm.2010.079574

---

Updated information and services can be found at:  
<http://bjsm.bmj.com/content/early/2011/01/24/bjasm.2010.079574.full.html>

---

*These include:*

- |                               |                                                                                                                                                                                                                                                               |
|-------------------------------|---------------------------------------------------------------------------------------------------------------------------------------------------------------------------------------------------------------------------------------------------------------|
| <b>References</b>             | This article cites 30 articles, 11 of which can be accessed free at:<br><a href="http://bjsm.bmj.com/content/early/2011/01/24/bjasm.2010.079574.full.html#ref-list-1">http://bjsm.bmj.com/content/early/2011/01/24/bjasm.2010.079574.full.html#ref-list-1</a> |
| <b>P&lt;P</b>                 | Published online February 14, 2011 in advance of the print journal.                                                                                                                                                                                           |
| <b>Email alerting service</b> | Receive free email alerts when new articles cite this article. Sign up in the box at the top right corner of the online article.                                                                                                                              |
- 

### Notes

---

Advance online articles have been peer reviewed and accepted for publication but have not yet appeared in the paper journal (edited, typeset versions may be posted when available prior to final publication). Advance online articles are citable and establish publication priority; they are indexed by PubMed from initial publication. Citations to Advance online articles must include the digital object identifier (DOIs) and date of initial publication.

---

To request permissions go to:  
<http://group.bmj.com/group/rights-licensing/permissions>

To order reprints go to:  
<http://journals.bmj.com/cgi/reprintform>

To subscribe to BMJ go to:  
<http://group.bmj.com/subscribe/>



**Multicomponent Intervention to Reduce Daily Sedentary Time: A Randomized Controlled Trial**

|                                 |                                                                                                                                                                                                                                                                                                                                  |
|---------------------------------|----------------------------------------------------------------------------------------------------------------------------------------------------------------------------------------------------------------------------------------------------------------------------------------------------------------------------------|
| Journal:                        | <i>BMJ Open</i>                                                                                                                                                                                                                                                                                                                  |
| Manuscript ID:                  | bmjopen-2013-003261.R2                                                                                                                                                                                                                                                                                                           |
| Article Type:                   | Research                                                                                                                                                                                                                                                                                                                         |
| Date Submitted by the Author:   | 12-Aug-2013                                                                                                                                                                                                                                                                                                                      |
| Complete List of Authors:       | Carr, Lucas; University of Iowa, Health and Human Physiology<br>Karvinen, Kristina; Nipissing University, School of Physical and Health Education<br>Peavler, Mallory; East Carolina University, Kinesiology<br>Smith, Rebecca; East Carolina University, Kinesiology<br>Cangelosi, Kayla; East Carolina University, Kinesiology |
| <b>Primary Subject Heading</b>: | Public health                                                                                                                                                                                                                                                                                                                    |
| Secondary Subject Heading:      | Occupational and environmental medicine                                                                                                                                                                                                                                                                                          |
| Keywords:                       | sedentary, worksite, technology                                                                                                                                                                                                                                                                                                  |
|                                 |                                                                                                                                                                                                                                                                                                                                  |

SCHOLARONE™  
Manuscripts

1  
2 1 **Multicomponent Intervention to Reduce Daily Sedentary Time: A Randomized Controlled Trial**  
3  
4 2

5  
6 3 **Corresponding Author:**  
7

8 4 Lucas J. Carr, Ph.D.; University of Iowa; Department of Health and Human Physiology; Field House  
9  
10 5 E118; Iowa City, IA 52242; Phone: (319)353-5432; Email: Lucas-Carr@uiowa.edu  
11  
12 6

13  
14  
15 7 **Co-Authors:**  
16

17 8 Kristina Karvinen, Ph.D.; School of Physical and Health Education; Nipissing University; North Bay,  
18  
19 9 Ontario, Canada  
20

21 10 Mallory Peavler, M.S., Department of Kinesiology; East Carolina University; Greenville, NC, USA  
22

23 11 Rebecca Smith, M.S.; Department of Kinesiology; East Carolina University; Greenville, NC, USA  
24

25 12 Kayla Cangelosi, M.S.; Department of Kinesiology; East Carolina University; Greenville, NC, USA  
26  
27 13

28  
29  
30 14 **Word Count:**  
31

32 15 **Keywords:** sedentary, multicomponent, cardiometabolic  
33  
34 16  
35  
36  
37 17  
38  
39 18  
40  
41 19  
42  
43 20  
44  
45 21  
46  
47 22  
48  
49  
50 23  
51  
52 24  
53  
54 25  
55  
56 26  
57  
58 27  
59  
60

**ABSTRACT**

**Objectives:** To test the efficacy of a multicomponent technology intervention for reducing daily sedentary time and improving cardiometabolic disease risk amongst sedentary, overweight university employees.

**Design:** Blinded, randomized controlled trial

**Setting:** A large south eastern university in the U.S.

**Participants:** Forty-nine middle-aged, primarily female, sedentary and overweight adults working in sedentary jobs enrolled in the study. A total of 40 participants completed the study.

**Interventions:** Participants were randomized to either: 1) an intervention group (N=23; 47.6±9.9 yrs; 94.1% female; 33.2±4.5 kg/m<sup>2</sup>); 2) or wait list control group (N=17; 42.6±8.9 yrs; 86.9% female; 31.7±4.9 kg/m<sup>2</sup>). The intervention group received a theory-based, internet-delivered program, a portable pedal machine at work and a pedometer for 12 weeks. The wait-list control group maintained their behaviors for 12 weeks.

**Outcome measures:** Primary (sedentary and physical activity behavior measured objectively via StepWatch) and secondary (heart rate, blood pressure, height, weight, waist circumference, percent body fat, cardiorespiratory fitness, fasting lipids) outcomes were measured at baseline and post-intervention (12 weeks). Exploratory outcomes including intervention compliance and process evaluation measures were also assessed post-intervention.

**Results:** Compared to controls, the intervention group reduced daily sedentary time (mean change (95%CI): -58.7 min/day (-118.4, 0.99; p<0.01)) after adjusting for baseline values and monitor wear time. Intervention participants logged onto the website 71.3% of all intervention days, used the pedal machine 37.7% of all working intervention days, and pedaled an average of 31.1 minutes/day.

**Conclusions:** These findings suggest the intervention was engaging and resulted in reductions in daily sedentary time amongst full-time sedentary employees. These findings hold public health significance due to the growing number of sedentary jobs and the potential of these technologies in large-scale worksite programs.

**Trial Registration:** [ClinicalTrials.gov #NCT01371084](https://clinicaltrials.gov/ct2/show/study/NCT01371084)

## Article focus

- The primary aim of this study was to test the effectiveness of a multicomponent intervention for reducing daily sedentary time amongst a sample of sedentary, overweight, full-time working adults compared to a waitlist control.
- We hypothesized that the intervention group would significantly reduce daily sedentary time compared to the wait-list control group after 12 weeks.
- As a secondary aim, we tested the effectiveness of this intervention for improving several cardiometabolic risk factors including adiposity, blood pressure, estimated aerobic fitness and blood lipids.
- As an exploratory aim, we conducted a process evaluation to explore intervention compliance and identify helpful components of the intervention.

## Key messages

- This multicomponent intervention resulted in significant reductions in time spent sedentary and waist circumference when comparing the intervention group to the wait list control group.
- The present study builds upon past studies as our study was among the first to demonstrate significant reductions in objectively measured sedentary time when compared to a control group.
- The findings of this study are important given the paucity of research in this area and growing evidence demonstrating the importance of limiting daily sedentary time for reducing risk of chronic diseases.

## Strengths

- Primary strengths of this study include: 1) among the first RCT's to target sedentary time as a primary outcome; 2) among the first RCT's to use an objective measure of sedentary time; 3) conducted a 12 week trial which extends previous sedentary interventions that have typically been of brief durations; 4) measured cardiometabolic risk factors; and 5) conducted a process evaluation to identify features of the intervention that worked particularly well.

## Limitations

- 1  
2 82 • Primary limitations of this study include: 1) small sample size (N=40) comprised primarily of  
3  
4 83 middle-aged females working at a single institution which limits generalizability; and 2)  
5  
6 84 differential drop out, although follow-up analyses indicate no differences between those that  
7  
8 85 dropped and those that completed for age (P=0.48), BMI (P=0.63), or daily sedentary time  
9  
10 86 (P=0.32).  
11  
12  
13 87  
14  
15 88

## 17 89 INTRODUCTION

19 90 Excessive time spent in sedentary behavior is an independent risk factor for multiple chronic  
20  
21 91 health outcomes including cardiovascular disease,[1 2] type 2 diabetes,[3] hypertension,[4] metabolic  
22  
23 92 syndrome[5] and obesity.[6] Conversely, recent acute experimental studies suggest interrupting  
24  
25 93 and/or replacing excessive sedentary behavior with light intensity physical activity throughout the day  
26  
27 94 may be effective for improving various cardiometabolic disease risk factors .[7 8]The modern  
28  
29 95 workplace has been identified as a setting in which individuals engage in prolonged bouts of  
30  
31 96 sedentary time [9]. Adults working in full-time sedentary jobs are at particular risk for being sedentary  
32  
33 97 as they often spend more than 75% of work time sitting[9-11].Currently, more than 27% of the U.S.  
34  
35 98 labor force works in low-activity occupations.[12] The observed decline in occupational energy  
36  
37 99 expenditure (~100 kcals/day) over the past 50 years has been identified as a key contributor to the  
38  
39 100 observed increase in mean body mass amongst U.S. adults over the same time period.[13]  
40  
41 101 Traditional behaviorally focused worksite interventions have focused primarily on increasing physical  
42  
43 102 activity and have resulted in modest effect sizes (Cohen's  $d = 0.21-0.22$ ).[14 15] In a shift away from  
44  
45 103 behaviorally focused approaches, studies grounded in social ecological theory[16] have begun testing  
46  
47 104 the effect of modifying the work environment to reduce occupational sedentary time.  
48  
49  
50

51  
52 105 To date, only a handful of sedentary interventions have been conducted in the worksite. While  
53  
54 106 many early worksite sedentary interventions did not demonstrate effectiveness [17], more recent trials  
55  
56 107 have shown promise for reducing sitting time [18-20]. Overall, many sedentary interventions studies  
57  
58 108 conducted in the worksite have been limited by the use of self-report measures of sedentary time  
59  
60

1  
2 109 and/or short duration interventions (1-4 weeks). Further, most studies in this area have promoted  
3  
4 110 reduced 'sitting time'. Given the recent availability of seated activity permissive workstations [10] and  
5  
6 111 the possible desire/need of many employers and employees to remain seated while completing their  
7  
8 112 work, there is a need for interventions that promote 'active sitting' as opposed to 'reduced sitting' as a  
9  
10 113 means for reducing sedentary time.

13 114 In a previous study testing the feasibility of modifying the work environment as a means of  
14  
15 115 reducing occupational sedentary time through promoting active sitting, our team provided portable  
16  
17 116 pedal machines (MagneTrainer, 3D Innovations) to 18 sedentary desk workers for four weeks [10].  
18  
19 117 Importantly, participants rated the pedal machines as feasible and acceptable for use while  
20  
21 118 completing their work. Further, despite a lack of any accompanying behavioral intervention,  
22  
23 119 participants used the pedal machines on 61% of all work days for an average of 23.4 minutes per  
24  
25 120 day. Although these results are promising, it is possible the addition of a motivational behavioral  
26  
27 121 intervention could result in increased pedaling compliance and reduced sedentary time.

30 122 The primary aim of the present study was to test the effectiveness of a multicomponent  
31  
32 123 intervention for reducing daily sedentary time amongst a sample of sedentary, overweight, full-time  
33  
34 124 working adults compared to a wait-list control group. We hypothesized that the intervention group  
35  
36 125 would significantly reduce daily sedentary time compared to the wait-list control group after 12 weeks.  
37  
38 126 As a secondary aim, we tested the effectiveness of intervention on cardiometabolic risk factors  
39  
40 127 including measures of adiposity, blood pressure, estimated aerobic fitness and blood lipids. We  
41  
42 128 hypothesized the intervention group would reduce their overall cardiometabolic disease risk  
43  
44 129 compared to the wait-list control group. Finally, as an exploratory aim, we conducted a process  
45  
46 130 evaluation to explore intervention compliance and identify helpful components of the intervention.  
47  
48 131

## 52 132 **METHODS**

### 54 133 **Subjects and Design**

1  
2 135 Many sedentary interventions to date have been limited by short durations. Therefore, we  
3  
4 136 conducted a 12 week randomized controlled trial design comparing a treatment group to a no  
5  
6 137 treatment wait-list control group. We recruited apparently healthy but physically inactive (self-reporting  
7  
8 138 less than 60 minutes of moderate-to-vigorous intensity physical activity per week), overweight (body  
9  
10 139 mass index (BMI)  $\geq 25.0$  kg/m<sup>2</sup>) adults working in full-time (reporting minimum of 35.0+ hours/week)  
11  
12 140 sedentary/desk-dependent occupations (reporting minimum of 75% of working time spent sitting).  
13  
14 141 Participants were required to gain permission from their supervisor prior to enrollment. Research staff  
15  
16 142 members screened participants for eligibility by telephone. Exclusionary criteria included: 1)  
17  
18 143 limitations with or contraindications to ambulatory exercise; 2) acute illness or injury; 3) cognitive  
19  
20 144 impairment, psychosis, or other diagnosed psychological illness (with the exception of depression and  
21  
22 145 anxiety); 4) currently using psychotropic drugs; or 5) diagnosis of a chronic condition such as heart  
23  
24 146 failure or cancer. Participants were not compensated for participation in the study. Experimental  
25  
26 147 protocols were approved by the University and Medical Center Institutional Review Board and  
27  
28 148 voluntary written informed consent was obtained from each participant.

29  
30  
31  
32 149 Participants of all races and ethnic backgrounds working at a large southern university were  
33  
34 150 passively recruited through email advertisements placed on an electronic mailing list serve that  
35  
36 151 served 5,392 employees. A total of 192 people responded to our advertisements of which 143 were  
37  
38 152 excluded from participation due to: not meeting eligibility criteria which primarily consisted of not  
39  
40 153 meeting BMI and/or physical activity requirements (N=120); declined to participate (N=19); or other  
41  
42 154 reasons (N=4). A 1:1 random allocation sequence was generated by the principal investigator using  
43  
44 155 an online random sequence generator.[21] Participants were assigned to one of two groups by a  
45  
46 156 research staff member not involved in data collection based on the order in which they enrolled into  
47  
48 157 the study. A total of 49 participants deemed interested and eligible for participation were randomized  
49  
50 158 to one of two groups: 1) intervention (N=25); 2) wait-list control (N=24). Of the 49 enrolled, 40  
51  
52 159 participants completed all baseline and post-intervention assessments. Nine participants were lost to  
53  
54 160 follow-up (see Figure 1). Final analyses were completed on 40 participants with 23 intervention  
55  
56 161 participants and 17 control participants (see Table 1). More than half of all participants were college  
57  
58  
59  
60



1  
2 162 educated, reported an annual income greater than \$40,000 and reported being non-Hispanic/White.

3  
4 163 Participants were enrolled and completed all testing sessions between June 2011 and June 2012.

5  
6 164  
7  
8  
9 165 [Figure 1 here]

## 10 166 11 12 13 167 **Group Descriptions**

### 14 15 168 16 17 169 *Wait List Control Group*

18  
19 170 Participants randomized to the wait-list control group were asked to maintain their current  
20 171 behaviors for 12 weeks at which time they were given the option to receive the intervention treatment  
21 172 materials.  
22  
23  
24  
25

### 26 173 27 28 174 *Intervention Group*

29  
30 175 The primary intent of the intervention was to encourage participants to reduce their time spent  
31 176 sedentary. The name used to promote the study on advertisements and study materials was  
32 177 "*Pedal@Work: Reducing time spent sedentary...*". The intervention (Figure 2) comprised of three  
33 178 primary components: 1) access to a portable pedal machine (MagneTrainer, 3D Innovations, Greeley,  
34 179 CO) at their worksite; 2) access to a motivational website (Walker Tracker, Portland, OR) to receive  
35 180 tips and reminders focused on reducing sedentary behaviors throughout the day; and 3) a pedometer  
36 181 to use in conjunction with the website (Omron HJ-150). The pedal machine is a portable (18" height,  
37 182 20" length) device that has been demonstrated as acceptable for use during sedentary office work  
38 183 [10]. Because participants were sedentary employees working in professional environments, the  
39 184 rationale for providing them pedal machines at work was to allow them to engage in light intensity  
40 185 activity (i.e. active sitting) that they could perform for long periods throughout the day without causing  
41 186 them to perspire. The pedal machine is accompanied by a PC interface and software package that  
42 187 allows for objective monitoring of individual pedal activity. This software also provides the user with  
43 188 real-time feedback via a display monitor on pedal time, distance, speed and caloric expenditure. The  
44  
45  
46  
47  
48  
49  
50  
51  
52  
53  
54  
55  
56  
57  
58  
59  
60

1  
2 189 research team delivered the pedal machine to each participant's worksite, downloaded the pedal  
3  
4 190 tracking software to the participant's work computer, and worked with the participant to identify the  
5  
6 191 most feasible set up. Intervention participants were asked to keep the pedal machine connected to  
7  
8 192 their PC during all working hours. Intervention participants were required to gain clearance to use the  
9  
10 193 pedal machines and software at their work prior to participation. No additional interaction between the  
11  
12 194 research staff and participant's supervisors occurred during the course of the study. Participants were  
13  
14 195 located in 18 different buildings across campus. No participants worked within visible proximity of  
15  
16 196 each other.  
17  
18

19 197 Intervention participants were also provided access to a motivational website that was  
20  
21 198 individually customized to the local culture of the worksite of which participants were recruited (Figure  
22  
23 199 2). Examples of customization included posting local images and messages specific to the local  
24  
25 200 institution. The content of the intervention focused primarily on reducing time spent sedentary (both  
26  
27 201 increasing active sitting via pedaling and taking breaks from sitting). Example messages included  
28  
29 202 "Let's try to pedal an extra five minutes during your lunch break today" and "Did you know standing up  
30  
31 203 burns more calories than sitting? Maybe it's time for a break!?" Most messages targeted time spent at  
32  
33 204 work although some messages broadly targeted sedentary time in general and could have impacted  
34  
35 205 sedentary time outside of work. Messages were theory based targeting constructs of the Social  
36  
37 206 Cognitive Theory[22] including self-monitoring, social support, self-efficacy, and perceived  
38  
39 207 environment. For example, participants were prompted via daily email messages to self-monitor their  
40  
41 208 daily pedal time and daily steps (via pedometer) on the website. The activity participants logged on  
42  
43 209 the website was used to fuel a virtual competition (aimed at building social support) in which small  
44  
45 210 groups of intervention participants (4-5 per group) collectively traveled across America. Participants  
46  
47 211 were also emailed three theory-based motivational messages each week targeting goal setting, self-  
48  
49 212 efficacy, and perceived environment. Specific goals were not set for intervention participants, rather  
50  
51 213 participants received advice on how to set goals and suggestions for daily pedaling time (e.g. "Try  
52  
53 214 fitting in 10 minutes of pedaling during your lunch today.") Finally, using a forum similar to Facebook,  
54  
55  
56  
57  
58  
59  
60

1  
2 215 participants were able to post profile photos and status updates on a newsfeed and send messages  
3  
4 216 to members of their small groups further fostering social support.  
5

6 217  
7  
8  
9 218 [Figure 2 here]  
10

## 11 219 12 13 220 **Measures**

14  
15 221 All measures were collected at baseline and post-intervention (12 weeks) in a controlled  
16  
17 222 laboratory setting by two staff members blinded to participant's group assignment. The two staff  
18  
19 223 members were provided specific measurement duties to ensure each measure was collected by the  
20  
21 224 same staff member at both baseline and post-intervention. The primary outcome was daily sedentary  
22  
23  
24 225 time as measured objectively by the StepWatch physical activity monitor (Orthocare Innovations,  
25  
26 226 Mountlake Terrace, Wash, USA). The StepWatch was specifically chosen for this study as it is worn  
27  
28 227 on the ankle making it ideally suited to measure both pedaling and walking behavior. Further, the  
29  
30 228 StepWatch has been demonstrated as a reliable measure of walking behavior (3 day agreements for  
31  
32 229 steps per day (39.1%) and percent inactive time ( 9.52%)) [23] and an accurate measure of both  
33  
34  
35 230 sedentary behaviors (89.8-99.5% accurate) and light intensity walking (86.1% accurate)[24]. The  
36  
37 231 StepWatch has demonstrated superior ability for detecting pedaling time (23.5-54.4% accurate) when  
38  
39 232 compared to hip worn accelerometers (8.1-47.1% correct).[25] Participants were asked to wear the  
40  
41 233 monitor during all wakeful hours for seven consecutive days and keep track of wear time using an  
42  
43 234 activity log. Days in which participants wore the monitors for less than 10 hours were excluded from  
44  
45 235 final analysis.. The threshold for sedentary (0 steps/min) was based on the recommendation provided  
46  
47 236 by the product manufacturer. The thresholds for light (1–45 steps/min), moderate- (46-75 steps/min)  
48  
49  
50 237 and vigorous (76+ steps/min) intensity physical activities were based on previous work which  
51  
52 238 demonstrated moderate-intensity walking stride rate to range from 90–113 steps/minute depending  
53  
54 239 on height and stride length[26].  
55

56 240 Blood pressure was measured with a stethoscope and sphygmomanometer using standard  
57  
58 241 techniques. Heart rate was monitored with a Polar™ heart rate monitor and chest strap. Body mass  
59  
60

1  
2 242 was measured to the nearest 0.1 kg and height to the nearest 0.5 cm using a professional grade  
3  
4 243 digital medical scale and height rod (Seca 769, Hanover,MD). Waist circumference was measured in  
5  
6 244 duplicate with a standard Gulick measuring tape according to standard procedures.[27] Fasting blood  
7  
8 245 lipids (total cholesterol, LDL cholesterol, HDL cholesterol, and triglycerides) were assessed via finger  
9  
10 246 stick and using a point-of-care analyzer (Cholestech LDX analyzer) that has previously been  
11  
12 247 demonstrated as an accurate and precise measure of total cholesterol (1.6% and 3.0% respectively),  
13  
14 248 HDL-cholesterol (-2.74% and 1.05% respectively) and triglycerides (2.11% and 2.65%  
15  
16 249 respectively).[28] Estimated aerobic fitness was assessed via a single-stage submaximal treadmill  
17  
18 250 walking test which had been previously demonstrated as a valid estimate of total aerobic fitness  
19  
20 251 amongst middle-aged adults.[29]

21  
22 252 Compliance with the pedal machine (i.e., minutes pedaled/day, total days pedaled) was  
23  
24 253 assessed objectively via the activity tracking software. Pedal compliance data was downloaded  
25  
26 254 directly from each individual's work computer at the end of 12 weeks. Website use compliance (e.g.,  
27  
28 255 number of website logins, number of steps logged on the website) was assessed objectively at the  
29  
30 256 end of 12 weeks via a backend tracking database made available by the website administrators. In  
31  
32 257 order to assess which components of the intervention participants 'perceived' as helpful for reducing  
33  
34 258 their sedentary time, a process evaluation survey was conducted at 12 weeks amongst intervention  
35  
36 259 completers. Participants rated each intervention component using a five point Likert scale.  
37  
38  
39  
40  
41  
42

### 43 261 **Design/Statistical Analysis**

44  
45 262 A sample size of 40 (recruiting 49 assuming 20% attrition) was necessary to detect, with 80%  
46  
47 263 power, at  $\alpha=0.05$ , a 30 minute/day difference in daily sedentary time. The 30 minute/day difference  
48  
49 264 was identified as a reasonable estimate based on our previous study in which participants used the  
50  
51 265 same pedal machines an average of 23 minutes/day without any motivational intervention.[10] Means  
52  
53 266 (SD) were used to describe data where appropriate. This study was not powered to detect differences  
54  
55 267 in the measured cardiometabolic risk factors. These measures were collected as secondary outcomes  
56  
57 268 and to inform future trials.  
58  
59  
60

The paired samples t-test was used to determine any within group differences at baseline and post-intervention. Analysis of covariance (ANCOVA) was used to test for differences between groups at post-intervention. Baseline values of interest were included as covariates in the model for all continuous variables consistent with recommended statistical procedures [30]. The underlying assumption no between group differences at baseline was confirmed for all measures by one way ANOVA. Finally, the 95% confidence interval (CI) for the mean differences of all primary and secondary outcomes of interest is presented.

## RESULTS

Baseline characteristics of both groups are presented in Table 1. Overall, participants were middle-aged and mostly classified as obese. More than half of all participants were college educated, reported an annual income greater than \$40,000 and reported being non-Hispanic/White. Differential drop out was observed over the course of the study, although sensitivity analyses indicate no differences between those that dropped and those that completed the study for measures of age (P=0.48), BMI (P=0.63), or daily sedentary time (P=0.32).

**Table 1.** Baseline characteristics by group Mean  $\pm$  S.D. (N=40)

|                               | Control Group<br>N=17 | Intervention Group<br>N=23 | All<br>(N=40) |
|-------------------------------|-----------------------|----------------------------|---------------|
| <b>Age (years)</b>            | 47.6(9.9)             | 42.6(8.9)                  | 44.7(9.6)     |
| <b>Female %</b>               | 94.1%                 | 86.9%                      | 90%           |
| <b>Height (in)</b>            | 65.2(3.2)             | 65.4(3.4)                  | 65.4(3.4)     |
| <b>Weight (lbs)</b>           | 201.3(30.2)           | 194.1(34.9)                | 197.2(32.8)   |
| <b>Body Mass Index (BMI)</b>  | 33.2(4.5)             | 31.7(4.9)                  | 32.4(4.8)     |
| <b>Non-Hispanic White (%)</b> | 76.5%                 | 63.6%                      | 70.0%         |
| <b>College Graduate (%)</b>   | 71.0%                 | 86.0%                      | 78.5%         |

|                                |       |       |       |
|--------------------------------|-------|-------|-------|
| <b>Income &gt;\$40,000 (%)</b> | 62.5% | 63.6% | 63.0% |
| <b>Job Category (%)</b>        |       |       |       |
| Professional/Executive         | 35.0% | 52.0% | 45.0% |
| Administrative                 | 65.0% | 48.0% | 55.0% |

Table 2 illustrates monitor wear time for both group at each time point and changes in the primary outcomes of sedentary and physical activity behaviors for both groups. No between group differences or within group differences were observed for monitor wear time at either baseline or post-intervention. No differences were observed for any sedentary or physical activity measures at baseline. A significant intervention effect favoring the intervention group (95% CI, -0.99, 118.4 minutes/day) was observed for absolute number of daily sedentary minutes after adjusting for baseline sedentary time and monitor wear time. Intervention effects reached near significance for both percent daily time spent sedentary (95% CI, -6.8%, -0.6%) and percent time spent in moderate intensity physical activity (95% CI, 0.0, 2.6%) (see Table 2).

**Table 2.** Absolute and relative time spent in sedentary and physical activity behaviors at baseline and post-intervention for Control (N=17) and Intervention (N=23) participants. Data presented as Mean(SD).

|                                    | Baseline     | Post-Intervention | Mean Difference <sup>a</sup><br>(95% CI) | Within Group P value | Between Group P value (Post) |
|------------------------------------|--------------|-------------------|------------------------------------------|----------------------|------------------------------|
| <b>Monitor Wear Time (Min/day)</b> |              |                   |                                          |                      | 0.15                         |
| Control                            | 829.6(93.5)  | 869.5(94.1)       |                                          | 0.10                 |                              |
| Intervention                       | 867.1(142.8) | 827.2(71.9)       |                                          | 0.42                 |                              |
| <b>Minutes Sedentary (Min/day)</b> |              |                   |                                          |                      | 0.01**                       |
| Control                            | 544.2(76.9)  | 599.7(106.6)      | +55.5 (2.8, 108.1)                       | 0.04*                |                              |
| Intervention                       | 584.9(136.1) | 526.1(77.3)       | -58.7 (-118.4, 0.99)                     | 0.04*                |                              |
| <b>% Time Sedentary</b>            |              |                   |                                          |                      | 0.06                         |
| Control                            | 65.7(7.5)    | 67.5(8.0)         | -1.8% (-2.7%, 6.3%)                      | 0.41                 |                              |
| Intervention                       | 67.6(7.2)    | 63.9(7.9)         | -3.7% (-6.8%, -0.6%)                     | 0.02*                |                              |
| <b>Minutes Light (Min/day)</b>     |              |                   |                                          |                      | 0.64                         |
| Control                            | 265.7(84.0)  | 262.2(70.8)       | - 3.5 (-45.6, 38.6)                      | 0.86                 |                              |
| Intervention                       | 263.9(69.5)  | 270.3(69.5)       | +6.4 (-18.7, 31.5)                       | 0.6                  |                              |

|                                   |            |            |                     |       |      |
|-----------------------------------|------------|------------|---------------------|-------|------|
| <b>% Time Light</b>               |            |            |                     |       | 0.16 |
| Control                           | 31.9(8.1)  | 30.3(8.4)  | -1.6% (-6.0%, 2.8%) | 0.46  |      |
| Intervention                      | 30.6(8.2)  | 32.7(7.6)  | 2.1% (-0.8%, 4.9%)  | 0.15  |      |
| <b>Minutes Moderate (Min/day)</b> |            |            |                     |       | 0.13 |
| Control                           | 18.6(25.2) | 17.4(23.7) | -1.2 (-4.9, 2.4)    | 0.5   |      |
| Intervention                      | 14.5(18.5) | 23.3(28.0) | +8.8 (-1.6, 19.2)   | 0.09  |      |
| <b>% Time Moderate</b>            |            |            |                     |       | 0.06 |
| Control                           | 2.3(3.2)   | 2.0(2.9)   | -0.3% (-0.7%, 0.2%) | 0.21  |      |
| Intervention                      | 1.5(1.5)   | 2.8(3.4)   | +1.3% (0.0%, 2.6%)  | 0.04* |      |
| <b>Minutes Vigorous (Min/day)</b> |            |            |                     |       | 0.33 |
| Control                           | 1.2(2.6)   | 1.5(2.7)   | +0.4 (-0.2, 0.9)    | 0.19  |      |
| Intervention                      | 2.7(6.4)   | 4.9(10.9)  | +2.2 (-2.7, 7.0)    | 0.37  |      |
| <b>% Time Vigorous</b>            |            |            |                     |       | 0.25 |
| Control                           | 0.1(0.3)   | 0.2(0.3)   | 0.0% (0.0%, 0.1%)   | 0.32  |      |
| Intervention                      | 0.3(0.6)   | 0.6(1.3)   | +0.3% (-0.3, 0.9%)  | 0.26  |      |

<sup>a</sup> Mean change from baseline (95% confidence interval), adjusted for baseline value (ANCOVA)

\* p < 0.05 for within group change from baseline (paired t-test)

\*\* p<0.05 for between group differences at post-intervention (ANCOVA)

Table 3 illustrates changes in the secondary outcomes of cardiometabolic risk factors for both groups. A significant intervention effect was observed for waist circumference p=0.03 after adjusting for baseline values (Table 3). No significant intervention effects were observed for any other cardiometabolic risk factors.

**Table 3.** Cardiometabolic risk factors at baseline and post-intervention for Control (N=17) and Intervention (N=23) participants. Data presented as Mean(SD).

|                               | Baseline    | Post-Intervention | Mean Difference <sup>a</sup><br>(95% CI) | Within Group<br>P value | Between<br>Group P value<br>(Post) |
|-------------------------------|-------------|-------------------|------------------------------------------|-------------------------|------------------------------------|
| <b>Weight (lbs)</b>           |             |                   |                                          |                         | 0.58                               |
| Control                       | 201.4(30.2) | 202.4(30.5)       | +1.0 (-1.0, 3.0)                         | 0.31                    |                                    |
| Intervention                  | 194.2(34.9) | 194.4(34.5)       | +0.2 (-2.3, 2.7)                         | 0.86                    |                                    |
| <b>BMI (kg/m<sup>2</sup>)</b> |             |                   |                                          |                         | 0.76                               |
| Control                       | 33.2(4.5)   | 33.4(4.6)         | +0.2 (-0.1, 0.5)                         | 0.21                    |                                    |
| Intervention                  | 31.8(5.0)   | 31.9(5.0)         | -0.1 (-0.3, 0.5)                         | 0.57                    |                                    |
| <b>Systolic BP (mmHg)</b>     |             |                   |                                          |                         | 0.70                               |
| Control                       | 117.1(13.0) | 117.5(12.8)       | -0.8 (-5.0, 3.6)                         | 0.71                    |                                    |

|                                  |             |             |                    |       |        |
|----------------------------------|-------------|-------------|--------------------|-------|--------|
| Intervention                     | 120.0(13.8) | 115.7(10.8) | -4.3 (-8.0, -0.7)  | 0.02* |        |
| <b>Diastolic BP (mmHg)</b>       |             |             |                    |       | 0.51   |
| Control                          | 72.8(10.3)  | 73.2(10.6)  | -0.1 (-5.0, 4.8)   | 0.96  |        |
| Intervention                     | 78.2(10.3)  | 75.4(7.4)   | -2.8 (-6.2, 0.7)   | 0.11  |        |
| <b>Waist Circumference (cm)</b>  |             |             |                    |       | 0.03** |
| Control                          | 92.9(11.1)  | 93.9(10.8)  | +1.0 (-0.7, 2.7)   | 0.22  |        |
| Intervention                     | 92.6(11.2)  | 91.6(11.3)  | -1.0 (-2.1, 0.3)   | 0.06  |        |
| <b>Estimated V02 (ml/kg/min)</b> |             |             |                    |       | 0.10   |
| Control                          | 29.6(2.5)   | 30.0(2.6)   | +0.3 (-0.1, 0.8)   | 0.14  |        |
| Intervention                     | 30.8(5.1)   | 31.1(4.6)   | +0.3 (-0.6, 1.1)   | 0.53  |        |
| <b>Total Cholesterol (mg/dL)</b> |             |             |                    |       | 0.83   |
| Control                          | 184.4(25.9) | 185.0(18.9) | -0.8 (-15.1, 13.4) | 0.91  |        |
| Intervention                     | 191.4(26.3) | 189.7(27.0) | +0.7 (-5.9, 7.2)   | 0.83  |        |
| <b>HDL (mg/dL)</b>               |             |             |                    |       | 0.65   |
| Control                          | 47.6(18.4)  | 46.7(18.9)  | -0.9 (-6.8, 5.1)   | 0.76  |        |
| Intervention                     | 45.7(17.6)  | 43.7(16.4)  | -2.1 (-8.1, 3.4)   | 0.46  |        |
| <b>LDL (mg/dL)</b>               |             |             |                    |       | 0.96   |
| Control                          | 111.2(32.1) | 120.2(25.3) | +5.4 (-11.3, 22.1) | 0.50  |        |
| Intervention                     | 119.4(23.2) | 116.7(29.4) | -3.7 (-12.8, 5.4)  | 0.41  |        |
| <b>Triglycerides</b>             |             |             |                    |       | 0.91   |
| Control                          | 130.6(65.4) | 131.0(59.9) | +4.7 (-24.0, 33.3) | 0.73  |        |
| Intervention                     | 98.4(45.2)  | 118.4(57.3) | +18.3 (-0.1, 36.7) | 0.05  |        |

<sup>a</sup> Mean change from baseline (95% confidence interval), adjusted for baseline value (ANCOVA)

\* p < 0.05 for within group change from baseline (paired t-test)

\*\* p<0.05 for between group differences at post-intervention (ANCOVA)

A total of 23 participants completed the intervention and provided compliance data (see Table 4). Intervention participants logged on to the website an average of 71.3% (59.8 days) of all days they had access to the website (including weekends) (Table 4). Intervention participants also logged an average of 7945 ± 4634 steps per day on the website over the 12 weeks. Participants pedaled an average of 37.7% (22.6 days) of all days they had access to the pedal machine (excluding weekends). Participants pedaled an average of 31.1±31.6 minutes per day on the days they used the pedal machines and for an average of 16.1±17.2 minutes per pedaling bout



**Table 4.** Intervention compliance measures amongst Intervention completers (N=23).

|                                                    | Mean/% | S.D. |
|----------------------------------------------------|--------|------|
| Web Compliance % (Days Logged in/Days with Access) | 71.3   | 35.7 |
| Average Steps Logged Per Day                       | 7945   | 4634 |
| Average Days Pedaled Over 12 Weeks                 | 22.6   | 17.6 |
| Pedal Compliance % (Days Pedaled/Days with Access) | 37.7   | 29.3 |
| Average Pedal Bouts/Day                            | 1.9    | 0.9  |
| Average Minutes Pedaled/Day Used                   | 31.1   | 31.6 |
| Average Minutes Pedaled/Pedal Bout                 | 16.1   | 17.2 |

When asked to rate the helpfulness of each intervention feature for reducing their sedentary time, participants rated the pedal machine biofeedback display, the pedometer, self-monitoring activity on the website as “extremely helpful” (median Likert score = 5.0; Table 5). Participants rated the email reminders to log daily activity and access to the pedal machine as “quite helpful” (median Likert score = 4.0; Table 5).

**Table 5:** Quartile and median Likert scale responses (1=Not at all helpful; 2=A little helpful; 3=moderately helpful; 4=Quite helpful; 5=Extremely helpful) on helpfulness of individual intervention components for reducing sedentary time (N=23).

| Please rate how helpful each of the following intervention components was in reducing your daily sedentary time. | Likert Scale |        |     |
|------------------------------------------------------------------------------------------------------------------|--------------|--------|-----|
|                                                                                                                  | Q1           | Median | Q3  |
| Pedal machine biofeedback display (minutes pedaled, calories burned, etc.)                                       | 4.0          | 5.0    | 5.0 |
| Wearing the pedometer                                                                                            | 4.0          | 5.0    | 5.0 |
| Self-monitoring daily steps and pedal time on the website                                                        | 4.0          | 5.0    | 5.0 |
| Email reminders to log physical activity on website                                                              | 4.0          | 4.0    | 5.0 |

|    |                                                                      |     |     |     |
|----|----------------------------------------------------------------------|-----|-----|-----|
| 1  |                                                                      |     |     |     |
| 2  | Access to pedal exercise machine at work                             | 4.0 | 4.0 | 5.0 |
| 3  |                                                                      |     |     |     |
| 4  | 'Walk Across America' Group Challenge on website                     | 3.0 | 3.0 | 5.0 |
| 5  |                                                                      |     |     |     |
| 6  | Social networking features on website (profile, newsfeed, messaging) | 3.0 | 3.0 | 4.0 |
| 7  |                                                                      |     |     |     |
| 8  | Environmental features (Walkscore, information on facilities)        | 3.0 | 3.0 | 3.8 |
| 9  |                                                                      |     |     |     |
| 10 | <hr/>                                                                |     |     |     |

11 330

13 331

15 332

## DISCUSSION

17 333

20 334

22 335

24 336

26 337

28 338

30 339

32 340

34 341

36 342

38 343

40 344

42 345

44 346

46 347

48 348

50 349

52 350

54 351

56 352

58 352

60

The primary findings of this study suggest that this multicomponent intervention resulted in significant time spent sedentary in a small sample of inactive, overweight employees. The decreased sedentary time observed among the intervention group appears to have been at least partially replaced by an increase in moderate intensity activity. Our findings are important as the present study was among the first worksite interventions to promote 'active sitting' as a means of reducing sedentary time. Further, the present study was conducted over a longer duration (12 weeks) compared to similar trials [19 31] which is necessary in order to determine whether the intervention instills habitual behavior change and/or whether such behavior change results in changes in cardiometabolic outcomes. While longer trials are necessary to confirm whether sedentary employees will adhere to such an intervention, process evaluation data suggests participants engaged with the intervention and maintained engagement through the 12 weeks. This study also utilized an objective measure of sedentary/physical activity behavior whereas many previous interventions have relied upon self-report measures of sedentary time[17]. The present study builds upon past studies as our study was among the first to demonstrate significant reductions in objectively measured sedentary time when compared to a control group. This is important, as it has been suggested that decreasing sedentary time can result in improved health benefits independent of physical activity.[2 32-34]

Sedentary time amongst the intervention group was reduced by an average of 58 minutes/day or 3.7% of daily time. Our findings are within the range of similar studies. For example, Kozy-Keadle et al. found daily sedentary time reduced from 67.0% to 62.7% after a simple, seven day intervention that included educational materials on sedentary health risks and tips to reduce sedentary time.[31]

1  
2 353 However, this study did not include a control group. In a study that did include a control group, Evans  
3  
4 354 et al. found no between group differences in objectively measured sitting time after five days of point-  
5  
6 355 of-choice software reminders to stand up every 30 minutes while at work.[19]  
7

8  
9 356 We also observed a significant intervention effect for waist circumference. This finding is  
10  
11 357 important as waist circumference has been shown to predict mortality amongst adults with coronary  
12  
13 358 artery disease.[35] Confidence in this finding is strengthened by past studies that have found waist  
14  
15 359 circumference to be sensitive to change in the absence of changes in other measures of adiposity[36]  
16  
17 360 as well as studies reporting interruptions from sedentary time to be associated with waist  
18  
19 361 circumference.[37] Furthermore, this finding is consistent with findings of a previous 16-week internet-  
20  
21 362 delivered physical activity program which demonstrated modest improvements in daily steps and  
22  
23 363 waist circumference.[36] The lack of changes in other cardiometabolic risk factors may be due to the  
24  
25  
26 364 low intensity of the intervention as well as the limited duration of 12 weeks. Studies of longer duration  
27  
28 365 are needed to determine whether long-term reduction in sedentary time results in cardiometabolic risk  
29  
30 366 reduction.  
31

32 367 Participant compliance to the website overall was high with participants logging into the  
33  
34 368 website an average of 71% of all intervention days. This is important as past internet-delivered  
35  
36 369 intervention studies have identified engagement to be a challenge [38 39] and a predictor of  
37  
38 370 intervention success.[40] By comparison, Lewis et al. reported participants logged on to a physical  
39  
40 371 activity website a median number of 50 times (13.7%) over 12 months.[41] Reasons for such high  
41  
42 372 website compliance in the present study may be due to the tailoring of the website to include locally  
43  
44 373 relevant images and messages and/or the regular email messages.  
45  
46

47 374 Participant compliance with the pedal machines in the present 12 week trial (31 minutes/day)  
48  
49 375 was higher when compared to compliance in our previous four week trial (23 minutes/day).[10] These  
50  
51 376 findings suggest the added motivational intervention, which included suggestions for setting goals and  
52  
53 377 finding time to pedal each day, resulted in improved daily compliance that was sustained over a  
54  
55 378 longer duration. Despite the logistical limitation of the portable pedal machine when paired with  
56  
57 379 standard height desks (i.e., many participants reported their knees hit the underside of their desk  
58  
59  
60

1  
2 380 while pedaling), participants used the pedal machine on a fairly regular basis. In order to maximize  
3  
4 381 compliance with such portable pedal machines in future studies, it is recommended these devices be  
5  
6 382 paired with height adjustable desks that allow for comfortable pedaling during computer work tasks.  
7

8  
9 383 Intervention participants reported features that provided feedback including the pedal machine  
10  
11 384 tracking software, pedometers and self-monitoring daily activity on the website (which was  
12  
13 385 immediately followed by a graph illustrating the individual's daily progress) as the most helpful  
14  
15 386 features for reducing their daily sedentary time. This information is important and could be used to  
16  
17 387 inform future interventions aimed at reducing sedentary behavior. This finding is consistent with past  
18  
19 388 studies which have found biofeedback as a useful tool to improve health behaviors.[42 43]

20  
21 389 The main limitation of the study was the limited generalizability due to a small sample size that  
22  
23 390 comprised primarily of middle-aged females working at a single institution. We also experienced  
24  
25 391 differential drop out, although follow-up analyses indicate no differences between those that dropped  
26  
27 392 and those that completed for age, BMI, or daily sedentary time.  
28  
29

30 393 The present study is among the first interventions conducted within the worksite aimed  
31  
32 394 specifically at reducing daily sedentary time to demonstrate between group differences in objectively  
33  
34 395 measured sedentary time. Compliance with the motivational website was high while compliance with  
35  
36 396 the pedal machine was moderate. These findings are promising considering the relatively low cost of  
37  
38 397 the intervention which cost a total of \$180 (pedal machine and software, pedometer, access to  
39  
40 398 website) per participant. While an intervention effect was observed for waist circumference, no  
41  
42 399 between group differences were observed for any other cardiometabolic risk factors. More sedentary  
43  
44 400 focused interventions are needed to examine whether reducing sedentary time can be sustained  
45  
46 401 long-term and whether long-term changes result in significant reductions in risk for chronic diseases.  
47  
48  
49  
50  
51  
52  
53

54 404 **Funding Source:** This study was funded by Oak Ridge Associated Universities grant #212112.  
55  
56 405  
57  
58  
59  
60

1  
2 406 **Competing Interests:** All authors have completed the ICMJE uniform disclosure form at  
3  
4 407 [www.icmje.org/coi\\_disclosure.pdf](http://www.icmje.org/coi_disclosure.pdf) and declare: no financial support from the funder Oak Ridge  
5  
6 408 Associated Universities for the submitted work, no financial relationships with any organizations that  
7  
8 409 might have an interest in the submitted work in the previous three years, and no other relationships or  
9  
10 410 activities that could appear to have influenced the submitted work.  
11  
12  
13

#### 14 411 **Contributorship Statement:**

- 15  
16  
17  
18 412 • Dr. Lucas Carr was responsible for the design of the study and led the manuscript preparation.
- 19  
20 413 • Dr. Kristina Karvinen assisted in the design of the study and assisted in the manuscript  
21  
22 414 preparation.
- 23  
24 415 • Ms. Mallory Peavler contributed to the manuscript preparation and was solely responsible for  
25  
26 416 leading the intervention which included duties of interacting with participants on a daily basis.
- 27  
28 417 • Ms. Rebecca Smith and Ms. Kayla Cangelosi both contributed to the manuscript preparation  
29  
30 418 and were responsible for collecting data at the baseline and post-intervention time points.  
31  
32  
33

#### 34 419 **Data Sharing**

- 35 420  
36 421 • No additional data available.  
37 422  
38

#### 39 423 **Figure Legend**

40 424  
41  
42 425 **Figure 1.** Sequence of events and recruitment/enrollment schematic. Study was coordinated at East  
43  
44 426 Carolina University, Greenville, NC, from June 2011-June 2012.  
45  
46 427  
47  
48  
49

50 428 **Figure 2.** Images of intervention features: A. Portable pedal machine, B. Pedal machine activity  
51  
52 429 tracking software screenshot, C. Pedal machine monitor feedback; D. Pedometer; and E. Screenshot  
53  
54 430 of the website homepage.  
55  
56  
57 431  
58  
59  
60

## REFERENCES

1. Warren TY, Barry V, Hooker SP, et al. Sedentary behaviors increase risk of cardiovascular disease mortality in men. *Med Sci Sports Exercise* 2010;42(5):879-85.
2. Thorp AA, Healy GN, Owen N, et al. Deleterious associations of sitting time and television viewing time with cardiometabolic risk biomarkers: Australian Diabetes, Obesity and Lifestyle (AusDiab) study 2004-2005. *Diabetes Care* 2010;33(2):327-34.
3. Roberts CK, Vaziri ND, Sindhu RK, et al. A high-fat, refined-carbohydrate diet affects renal NO synthase protein expression and salt sensitivity. *J Appl Physiol* 2003;94(3):941-6 .
4. Beunza JJ, Martinez-Gonzalez MA, Ebrahim S, et al. Sedentary behaviors and the risk of incident hypertension: the SUN Cohort. *Am J Hypertens* 2007;20(11):1156-62.
5. Ford ES, Kohl HW, 3rd, Mokdad AH, et al. Sedentary behavior, physical activity, and the metabolic syndrome among U.S. adults. *Obesity Res* 2005;13(3):608-14.
6. Must A, Tybor DJ. Physical activity and sedentary behavior: a review of longitudinal studies of weight and adiposity in youth. *Int J Obes (Lond)* 2005;29 Suppl 2:S84-96.
7. Dunstan DW, Kingwell BA, Larsen R, et al. Breaking up prolonged sitting reduces postprandial glucose and insulin responses. *Diabetes Care* 2012;35(5):976-83.
8. Duvivier BM, Schaper NC, Bremers MA, et al. Minimal intensity physical activity (standing and walking) of longer duration improves insulin action and plasma lipids more than shorter periods of moderate to vigorous exercise (cycling) in sedentary subjects when energy expenditure is comparable. *PLoS One* 2013;8(2):e55542.
9. Thorp AA, Healy GN, Winkler E, et al. Prolonged sedentary time and physical activity in workplace and non-work contexts: a cross-sectional study of office, customer service and call centre employees. *Int J Behav Nutr Phys Act* 2012;9:128.
10. Carr LJ, Walaska KA, Marcus BH. Feasibility of a portable pedal exercise machine for reducing sedentary time in the workplace. *Br J Sports Med* 2012;46(6):430-5.
11. McCrady SK, Levine JA. Sedentariness at work: how much do we really sit? *Obesity (Silver Spring)* 2009;17(11):2103-5.
12. Brownson RC, Boehmer TK, Luke DA. Declining rates of physical activity in the United States: what are the contributors? *Annu Rev Public Health* 2005;26:421-43.
13. Church TS, Thomas DM, Tudor-Locke C, et al. Trends over 5 decades in U.S. occupation-related physical activity and their associations with obesity. *PLoS One* 2011;6(5):e19657.
14. Conn VS, Hafdahl AR, Cooper PS, et al. Meta-analysis of workplace physical activity interventions. *American journal of preventive medicine* 2009;37(4):330-9.
15. Dishman RK, Oldenburg B, O'Neal H, et al. Worksite physical activity interventions. *Amer J Prev Med* 1998;15(4):344-61.
16. Stokols D, Pelletier KR, Fielding JE. The ecology of work and health: research and policy directions for the promotion of employee health. *Health Educ Q* 1996;23(2):137-58.
17. Chau JY, der Ploeg HP, van Uffelen JG, et al. Are workplace interventions to reduce sitting effective? A systematic review. *Prev Med* 2010;51(5):352-6.
18. Healy GN, Eakin EG, Lamontagne AD, et al. Reducing sitting time in office workers: Short-term efficacy of a multicomponent intervention. *Prev Med* 2013;57(1):43-8.
19. Evans RE, Fawole HO, Sheriff SA, et al. Point-of-choice prompts to reduce sitting time at work: a randomized trial. *Amer J Prev Med* 2012;43(3):293-7.
20. Alkhajah TA, Reeves MM, Eakin EG, et al. Sit-stand workstations: a pilot intervention to reduce office sitting time. *Amer J Prev Med* 2012;43(3):298-303.
21. Random.org. Random Sequence Generator. Secondary Random Sequence Generator 2011. <http://www.random.org/sequences/>.

- 1  
2 481 22. Bandura, editor. Social Foundations of Thought and Action: A Social Cognitive Theory.  
3 482 Englewood Cliffs, NJ: Prentice-Hall, 1986.
- 4 483 23. Mudge S, Taylor D, Chang O, et al. Test-retest reliability of the StepWatch Activity Monitor outputs  
5 484 in healthy adults. *J Phys Act Health* 2010;7(5):671-6.
- 6 485 24. Foster RC, Lanningham-Foster LM, Manohar C, et al. Precision and accuracy of an ankle-worn  
7 486 accelerometer-based pedometer in step counting and energy expenditure. *Prev Med*  
8 487 2005;41(3-4):778-83.
- 9 488 25. Carr LJ, Mahar MT. Accuracy of intensity and inclinometer output of three activity monitors for  
10 489 identification of sedentary behavior and light-intensity activity. *J Obes*; 2012;1-9.
- 11 490 26. Rowe DA, Welk GJ, Heil DP, et al. Stride rate recommendations for moderate-intensity walking.  
12 491 *Med Sci Sports Exercise* 2011;43(2):312-8.
- 13 492 27. ACSM. ACSM's Guidelines for Exercise Testing and Prescription. In: ACSM, ed. Seventh ed:  
14 493 Lippincott Williams & Wilkins, 2006.
- 15 494 28. Issa JS, Strunz C, Giannini SD, et al. Precision and accuracy of blood lipid analyses by a portable  
16 495 device (Cholestech-LDX). *Arquivos brasileiros de cardiologia* 1996;66(6):339-42.
- 17 496 29. Ebbeling CB, Ward A, Puleo EM, et al. Development of a single-stage submaximal treadmill  
18 497 walking test. *Med Sci Sports Exercise* 1991 23;8:966-73.
- 19 498 30. Van Breukelen GJ. ANCOVA versus change from baseline: more power in randomized studies,  
20 499 more bias in nonrandomized studies [corrected]. *J Clin Epidemiol* 2006;59(9):920-5.
- 21 500 31. Kozey-Keadle S, Libertine A, Staudenmayer J, et al. The Feasibility of Reducing and Measuring  
22 501 Sedentary Time among Overweight, Non-Exercising Office Workers. *J Obes* 2012:1-10.
- 23 502 32. Owen N, Sparling PB, Healy GN, et al. Sedentary behavior: emerging evidence for a new health  
24 503 risk. *Mayo Clin Proc* 2010;85(12):1138-41.
- 25 504 33. Rhodes RE, Mark RS, Temmel CP. Adult sedentary behavior: a systematic review. *Am J Prev*  
26 505 *Med* 2012;42(3):e3-28.
- 27 506 34. Thorp AA, Owen N, Neuhaus M, et al. Sedentary behaviors and subsequent health outcomes in  
28 507 adults a systematic review of longitudinal studies, 1996-2011. *Am J Prev Med* 2011;41(2):207-  
29 508 15.
- 30 509 35. Coutinho T, Goel K, Correa de Sa D, et al. Combining body mass index with measures of central  
31 510 obesity in the assessment of mortality in subjects with coronary disease: role of "normal  
32 511 weight central obesity". *J Am Coll Cardiol* 2013;61(5):553-60.
- 33 512 36. Carr LJ, Bartee RT, Dorozynski C, et al. Internet-delivered behavior change program increases  
34 513 physical activity and improves cardiometabolic disease risk factors in sedentary adults: results  
35 514 of a randomized controlled trial. *Prev Med* 2008;46(5):431-8.
- 36 515 37. Healy GN, Dunstan DW, Salmon J, et al. Breaks in sedentary time: beneficial associations with  
37 516 metabolic risk. *Diabetes Care* 2008;31(4):661-6 ..
- 38 517 38. Spittaels H, De Bourdeaudhuij I, Vandelanotte C. Evaluation of a website-delivered computer-  
39 518 tailored intervention for increasing physical activity in the general population. *Prev Med*  
40 519 2007;44(3):209-17.
- 41 520 39. Vandelanotte C, Spathonis KM, Eakin EG, et al. Website-delivered physical activity interventions  
42 521 a review of the literature. *Am J Prev Med* 2007;33(1):54-64.
- 43 522 40. van den Berg MH, Ronday HK, Peeters AJ, et al. Engagement and satisfaction with an Internet-  
44 523 based physical activity intervention in patients with rheumatoid arthritis. *Rheumatology*  
45 524 (*Oxford, England*) 2007;46(3):545-52.
- 46 525 41. Lewis B, Williams D, Dunsiger S, et al. User attitudes towards physical activity websites in a  
47 526 randomized controlled trial. *Prev Med* 2008;47(5):508-13.
- 48 527 42. Proper KI, van der Beek AJ, Hildebrandt VH, et al. Short term effect of feedback on fitness and  
49 528 health measurements on self reported appraisal of the stage of change. *Br J Sports Med*  
50 529 2003;37(6):529-34.
- 51 530 43. Bravata DM, Smith-Spangler C, Sundaram V, et al. Using pedometers to increase physical activity  
52 531 and improve health: a systematic review. *JAMA* 2007;298(19):2296-304.
- 53 532  
54 533  
55  
56  
57  
58  
59  
60

1  
2  
3  
4  
5  
6  
7  
8  
9  
10  
11  
12  
13  
14  
15  
16  
17  
18  
19  
20  
21  
22  
23  
24  
25  
26  
27  
28  
29  
30  
31  
32  
33  
34  
35  
36  
37  
38  
39  
40  
41  
42  
43  
44  
45  
46  
47  
48  
49  
50  
51  
52  
53  
54  
55  
56  
57  
58  
59  
60

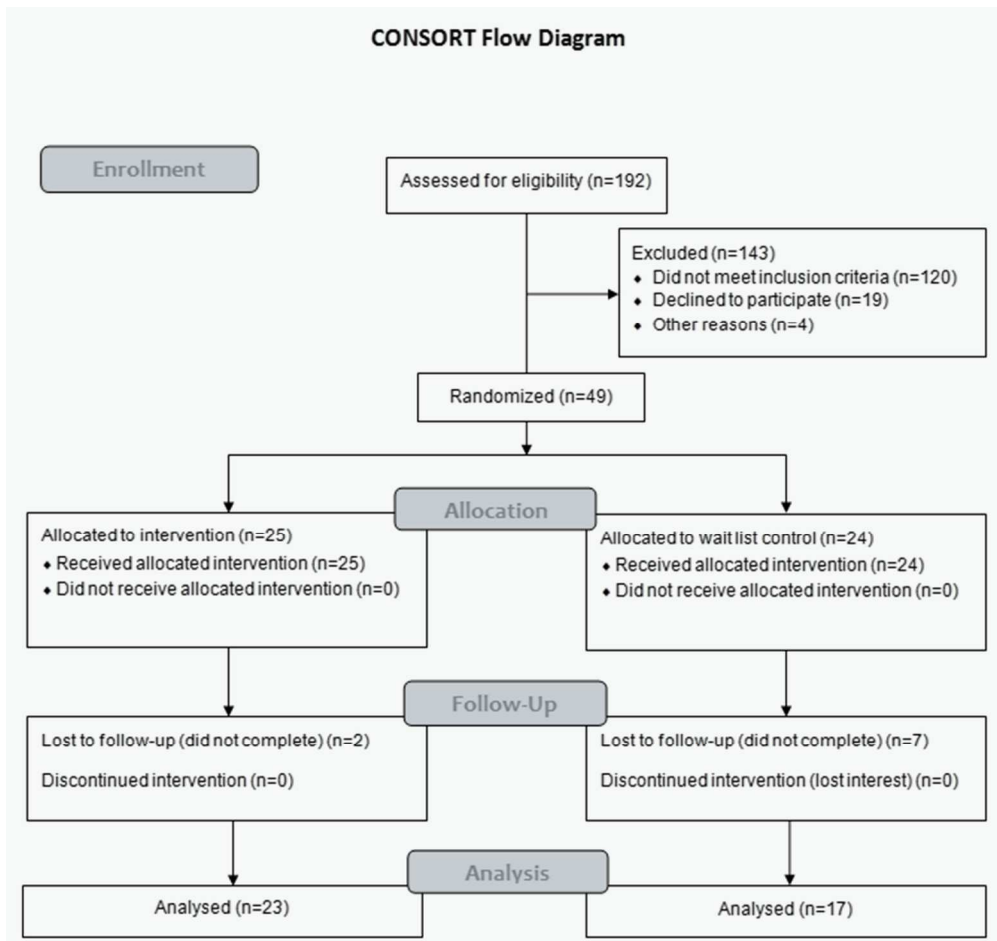

177x167mm (300 x 300 DPI)

only



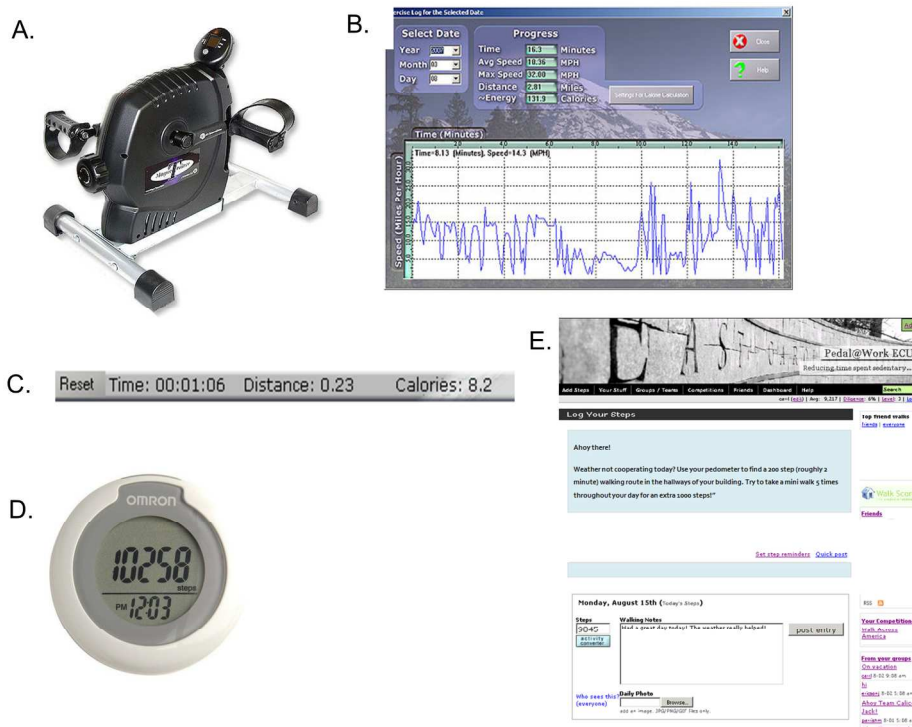

Figure 2. Images of intervention features: A. Portable pedal machine, B. Pedal machine activity tracking software screenshot, C. Pedal machine monitor feedback; D. Pedometer; and E. Screenshot of the website homepage.

254x190mm (300 x 300 DPI)



CONSORT 2010 checklist of information to include when reporting a randomised trial\*

| Section/Topic                    | Item No | Checklist item                                                                                                                                                                              | Reported on page No |
|----------------------------------|---------|---------------------------------------------------------------------------------------------------------------------------------------------------------------------------------------------|---------------------|
| <b>Title and abstract</b>        |         |                                                                                                                                                                                             |                     |
|                                  | 1a      | Identification as a randomised trial in the title                                                                                                                                           | 1                   |
|                                  | 1b      | Structured summary of trial design, methods, results, and conclusions (for specific guidance see CONSORT for abstracts)                                                                     | 2                   |
| <b>Introduction</b>              |         |                                                                                                                                                                                             |                     |
| Background and objectives        | 2a      | Scientific background and explanation of rationale                                                                                                                                          | 3-4                 |
|                                  | 2b      | Specific objectives or hypotheses                                                                                                                                                           | 4                   |
| <b>Methods</b>                   |         |                                                                                                                                                                                             |                     |
| Trial design                     | 3a      | Description of trial design (such as parallel, factorial) including allocation ratio                                                                                                        | 5                   |
|                                  | 3b      | Important changes to methods after trial commencement (such as eligibility criteria), with reasons                                                                                          | NA                  |
| Participants                     | 4a      | Eligibility criteria for participants                                                                                                                                                       | 4-5                 |
|                                  | 4b      | Settings and locations where the data were collected                                                                                                                                        | 7                   |
| Interventions                    | 5       | The interventions for each group with sufficient details to allow replication, including how and when they were actually administered                                                       | 5-6                 |
| Outcomes                         | 6a      | Completely defined pre-specified primary and secondary outcome measures, including how and when they were assessed                                                                          | 7                   |
|                                  | 6b      | Any changes to trial outcomes after the trial commenced, with reasons                                                                                                                       | NA                  |
| Sample size                      | 7a      | How sample size was determined                                                                                                                                                              | 8                   |
|                                  | 7b      | When applicable, explanation of any interim analyses and stopping guidelines                                                                                                                | NA                  |
| <b>Randomisation:</b>            |         |                                                                                                                                                                                             |                     |
| Sequence generation              | 8a      | Method used to generate the random allocation sequence                                                                                                                                      | 5                   |
|                                  | 8b      | Type of randomisation; details of any restriction (such as blocking and block size)                                                                                                         | 5                   |
| Allocation concealment mechanism | 9       | Mechanism used to implement the random allocation sequence (such as sequentially numbered containers), describing any steps taken to conceal the sequence until interventions were assigned | 5                   |
| Implementation                   | 10      | Who generated the random allocation sequence, who enrolled participants, and who assigned participants to interventions                                                                     | 5                   |

|    |                                                      |     |                                                                                                                                                   |
|----|------------------------------------------------------|-----|---------------------------------------------------------------------------------------------------------------------------------------------------|
| 1  |                                                      |     |                                                                                                                                                   |
| 2  | Blinding                                             | 11a | If done, who was blinded after assignment to interventions (for example, participants, care providers, those assessing outcomes) and how          |
| 3  |                                                      |     | 5&7                                                                                                                                               |
| 4  |                                                      | 11b | If relevant, description of the similarity of interventions                                                                                       |
| 5  |                                                      |     | NA                                                                                                                                                |
| 6  | Statistical methods                                  | 12a | Statistical methods used to compare groups for primary and secondary outcomes                                                                     |
| 7  |                                                      | 12b | Methods for additional analyses, such as subgroup analyses and adjusted analyses                                                                  |
| 8  |                                                      |     | NA                                                                                                                                                |
| 9  | <b>Results</b>                                       |     |                                                                                                                                                   |
| 10 | Participant flow (a diagram is strongly recommended) | 13a | For each group, the numbers of participants who were randomly assigned, received intended treatment, and were analysed for the primary outcome    |
| 11 |                                                      | 13b | For each group, losses and exclusions after randomisation, together with reasons                                                                  |
| 12 |                                                      |     | 5                                                                                                                                                 |
| 13 | Recruitment                                          | 14a | Dates defining the periods of recruitment and follow-up                                                                                           |
| 14 |                                                      | 14b | Why the trial ended or was stopped                                                                                                                |
| 15 |                                                      |     | 5                                                                                                                                                 |
| 16 | Baseline data                                        | 15  | A table showing baseline demographic and clinical characteristics for each group                                                                  |
| 17 | Numbers analysed                                     | 16  | For each group, number of participants (denominator) included in each analysis and whether the analysis was by original assigned groups           |
| 18 |                                                      |     | Table 1 (p.9)                                                                                                                                     |
| 19 |                                                      |     | 5                                                                                                                                                 |
| 20 | Outcomes and estimation                              | 17a | For each primary and secondary outcome, results for each group, and the estimated effect size and its precision (such as 95% confidence interval) |
| 21 |                                                      | 17b | For binary outcomes, presentation of both absolute and relative effect sizes is recommended                                                       |
| 22 |                                                      |     | 8-13                                                                                                                                              |
| 23 | Ancillary analyses                                   | 18  | Results of any other analyses performed, including subgroup analyses and adjusted analyses, distinguishing pre-specified from exploratory         |
| 24 |                                                      |     | NA                                                                                                                                                |
| 25 |                                                      |     | 8-13                                                                                                                                              |
| 26 | Harms                                                | 19  | All important harms or unintended effects in each group (for specific guidance see CONSORT for harms)                                             |
| 27 |                                                      |     | NA                                                                                                                                                |
| 28 | <b>Discussion</b>                                    |     |                                                                                                                                                   |
| 29 | Limitations                                          | 20  | Trial limitations, addressing sources of potential bias, imprecision, and, if relevant, multiplicity of analyses                                  |
| 30 | Generalisability                                     | 21  | Generalisability (external validity, applicability) of the trial findings                                                                         |
| 31 | Interpretation                                       | 22  | Interpretation consistent with results, balancing benefits and harms, and considering other relevant evidence                                     |
| 32 |                                                      |     | 15                                                                                                                                                |
| 33 |                                                      |     | 15                                                                                                                                                |
| 34 |                                                      |     | 13-16                                                                                                                                             |
| 35 | <b>Other information</b>                             |     |                                                                                                                                                   |
| 36 | Registration                                         | 23  | Registration number and name of trial registry                                                                                                    |
| 37 |                                                      |     | ClinicalTrials.gov (NCT01371084)                                                                                                                  |
| 38 |                                                      |     | 4)                                                                                                                                                |
| 39 | Protocol                                             | 24  | Where the full trial protocol can be accessed, if available                                                                                       |
| 40 |                                                      |     | Oak Ridge Associated Universities                                                                                                                 |
| 41 |                                                      |     |                                                                                                                                                   |
| 42 |                                                      |     |                                                                                                                                                   |
| 43 |                                                      |     |                                                                                                                                                   |
| 44 | CONSORT 2010 checklist                               |     |                                                                                                                                                   |
| 45 |                                                      |     |                                                                                                                                                   |
| 46 |                                                      |     |                                                                                                                                                   |
| 47 |                                                      |     |                                                                                                                                                   |
| 48 |                                                      |     |                                                                                                                                                   |
| 49 |                                                      |     |                                                                                                                                                   |

---

Grant  
(#212112)

---

1  
2  
3  
4  
5 Funding 25 Sources of funding and other support (such as supply of drugs), role of funders  
6

---

7 \*We strongly recommend reading this statement in conjunction with the CONSORT 2010 Explanation and Elaboration for important clarifications on all the  
8 items. If relevant, we also recommend reading CONSORT extensions for cluster randomised trials, non-inferiority and equivalence trials, non-pharmacological  
9 treatments, herbal interventions, and pragmatic trials. Additional extensions are forthcoming: for those and for up to date references relevant to this checklist,  
10 see [www.consort-statement.org](http://www.consort-statement.org).  
11  
12  
13  
14  
15  
16  
17  
18  
19  
20  
21  
22  
23  
24  
25  
26  
27  
28  
29  
30  
31  
32  
33  
34  
35  
36  
37  
38  
39  
40  
41  
42  
43  
44  
45  
46  
47  
48  
49

1  
2 1 **Multicomponent Intervention to Reduce Daily Sedentary Time: A Randomized Controlled Trial**  
3

4 2  
5  
6 3 **Corresponding Author:**  
7

8 4 Lucas J. Carr, Ph.D.; University of Iowa; Department of Health and Human Physiology; Field House  
9 5 E118; Iowa City, IA 52242; Phone: (319)353-5432; Email: Lucas-Carr@uiowa.edu  
10  
11  
12 6

13  
14  
15 7 **Co-Authors:**  
16

17 8 Kristina Karvinen, Ph.D.; School of Physical and Health Education; Nipissing University; North Bay,  
18 9 Ontario, Canada  
19

20  
21 10 Mallory Peavler, M.S., Department of Kinesiology; East Carolina University; Greenville, NC, USA  
22

23 11 Rebecca Smith, M.S.; Department of Kinesiology; East Carolina University; Greenville, NC, USA  
24

25  
26 12 Kayla Cangelosi, M.S.; Department of Kinesiology; East Carolina University; Greenville, NC, USA  
27  
28 13

29  
30 14 **Word Count:**  
31

32 15 **Keywords:** sedentary, multicomponent, cardiometabolic  
33  
34 16  
35  
36  
37 17  
38  
39 18  
40  
41 19  
42  
43 20  
44  
45 21  
46  
47 22  
48  
49  
50 23  
51  
52 24  
53  
54 25  
55  
56 26  
57  
58 27  
59  
60

**ABSTRACT**

**Objectives:** To test the efficacy of a multicomponent technology intervention for reducing daily sedentary time and improving cardiometabolic disease risk amongst sedentary, overweight university employees.

**Design:** Blinded, randomized controlled trial

**Setting:** A large south eastern university in the U.S.

**Participants:** Forty-nine middle-aged, primarily female, sedentary and overweight adults working in sedentary jobs enrolled in the study. A total of 40 participants completed the study.

**Interventions:** Participants were randomized to either: 1) an intervention group (N=23; 47.6±9.9 yrs; 94.1% female; 33.2±4.5 kg/m<sup>2</sup>); 2) or wait list control group (N=17; 42.6±8.9 yrs; 86.9% female; 31.7±4.9 kg/m<sup>2</sup>). The intervention group received a theory-based, internet-delivered program, a portable pedal machine at work and a pedometer for 12 weeks. The wait-list control group maintained their behaviors for 12 weeks.

**Outcome measures:** Primary (sedentary and physical activity behavior measured objectively via StepWatch) and secondary (heart rate, blood pressure, height, weight, waist circumference, percent body fat, cardiorespiratory fitness, fasting lipids) outcomes were measured at baseline and post-intervention (12 weeks). Exploratory outcomes including intervention compliance and process evaluation measures were also assessed post-intervention.

**Results:** Compared to controls, the intervention group reduced daily sedentary time (mean change (95%CI): -58.7 min/day (-118.4, 0.99; p<0.01)) after adjusting for baseline values and monitor wear time. Intervention participants logged onto the website 71.3% of all intervention days, used the pedal machine 37.7% of all working intervention days, and pedaled an average of 31.1 minutes/day.

**Conclusions:** These findings suggest the intervention was engaging and resulted in reductions in daily sedentary time amongst full-time sedentary employees. These findings hold public health significance due to the growing number of sedentary jobs and the potential of these technologies in large-scale worksite programs.

**Trial Registration:** [ClinicalTrials.gov #NCT01371084](https://clinicaltrials.gov/ct2/show/study/NCT01371084)

## Article focus

- The primary aim of this study was to test the effectiveness of a multicomponent intervention for reducing daily sedentary time ~~and improving cardiometabolic risk factors~~ amongst a sample of sedentary, overweight, full-time working adults compared to a waitlist control.
- We hypothesized that the intervention group would significantly reduce daily sedentary time ~~and select cardiometabolic disease risk factors~~ compared to the wait-list control group after 12 weeks.
- As a secondary aim, we tested the effectiveness of this intervention for improving several cardiometabolic risk factors including adiposity, blood pressure, estimated aerobic fitness and blood lipids.
- As an exploratory aim, we conducted a process evaluation to explore intervention compliance and identify helpful components of the intervention.

## Key messages

- This multicomponent intervention resulted in significant reductions in time spent sedentary and waist circumference when comparing the intervention group to the wait list control group.
- The present study builds upon past studies as our study was among the first to demonstrate significant reductions in objectively measured sedentary time when compared to a control group.
- The findings of this study are important given the paucity of research in this area and growing evidence demonstrating the importance of limiting daily sedentary time for reducing risk of chronic diseases.

## Strengths

- Primary strengths of this study include: 1) among the first RCT's to target sedentary time as a primary outcome; 2) among the first RCT's to use an objective measure of sedentary time; 3) conducted a 12 week trial which extends previous sedentary interventions that have typically been of brief durations; 4) measured cardiometabolic risk factors; and 5) conducted a process evaluation to identify features of the intervention that worked particularly well.

## Limitations

- Primary limitations of this study include: 1) small sample size (N=40) comprised primarily of middle-aged females working at a single institution which limits generalizability; and 2) differential drop out, although follow-up analyses indicate no differences between those that dropped and those that completed for age (P=0.48), BMI (P=0.63), or daily sedentary time (P=0.32).

## INTRODUCTION

Excessive time spent in sedentary behavior is an independent risk factor for multiple chronic health outcomes including cardiovascular disease,[1 2] type 2 diabetes,[3] hypertension,[4] metabolic syndrome[5] and obesity.[6] Conversely, recent acute experimental studies suggest interrupting and/or replacing excessive sedentary behavior with light intensity physical activity throughout the day may be effective for improving various cardiometabolic disease risk factors .[7 8]The modern workplace has been identified as a setting in which individuals engage in prolonged bouts of sedentary time [9]. Adults working in full-time sedentary jobs are at particular risk for being sedentary as they often spend more than 75% of work time sitting[9-11].Currently, more than 27% of the U.S. labor force works in low-activity occupations.[12] The observed decline in occupational energy expenditure (~100 kcals/day) over the past 50 years has been identified as a key contributor to the observed increase in mean body mass amongst U.S. adults over the same time period.[13] Traditional behaviorally focused worksite interventions have focused primarily on increasing physical activity and have resulted in modest effect sizes (Cohen's  $d = 0.21-0.22$ ).[14 15] In a shift away from behaviorally focused approaches, studies grounded in social ecological theory[16] have begun testing the effect of modifying the work environment to reduce occupational sedentary time.

To date, only a handful of sedentary interventions have been conducted in the worksite. While many early worksite sedentary interventions did not demonstrate effectiveness [17], more recent trials have shown promise for reducing sitting time [18-20]. Overall, many sedentary interventions studies



1  
2 109 conducted in the worksite have been limited by the use of self-report measures of sedentary time  
3  
4 110 and/or short duration interventions (1-4 weeks). Further, most studies in this area have promoted  
5  
6 111 reduced 'sitting time'. Given the recent availability of seated activity permissive workstations [10] and  
7  
8 112 the possible desire/need of many employers and employees to remain seated while completing their  
9  
10 113 work, there is a need for interventions that promote 'active sitting' as opposed to 'reduced sitting' as a  
11  
12 114 means for reducing sedentary time.

13  
14  
15 115 In a previous study testing the feasibility of modifying the work environment as a means of  
16  
17 116 reducing occupational sedentary time through promoting active sitting, our team provided portable  
18  
19 117 pedal machines (MagneTrainer, 3D Innovations) to 18 sedentary desk workers for four weeks [10].  
20  
21 118 Importantly, participants rated the pedal machines as feasible and acceptable for use while  
22  
23 119 completing their work. Further, despite a lack of any accompanying behavioral intervention,  
24  
25 120 participants used the pedal machines on 61% of all work days for an average of 23.4 minutes per  
26  
27 121 day. Although these results are promising, it is possible the addition of a motivational behavioral  
28  
29 122 intervention could result in increased pedaling compliance and reduced sedentary time.  
30  
31

32 123 The primary aim of the present study was to test the effectiveness of a multicomponent  
33  
34 124 intervention for reducing daily sedentary time ~~and improving cardiometabolic risk factors~~ amongst a  
35  
36 125 sample of sedentary, overweight, full-time working adults compared to a wait-list control group. We  
37  
38 126 hypothesized that the intervention group would significantly reduce daily sedentary time ~~and select~~  
39  
40 127 ~~cardiometabolic disease risk factors~~ compared to the wait-list control group after 12 weeks. As a  
41  
42 128 secondary aim, we tested the effectiveness of intervention on cardiometabolic risk factors including  
43  
44 129 measures of adiposity, blood pressure, estimated aerobic fitness and blood lipids. We hypothesized  
45  
46 130 the intervention group would reduce their overall cardiometabolic disease risk compared to the wait-  
47  
48 131 list control group. Finally, as an exploratory aim, we conducted a process evaluation to explore  
49  
50 132 intervention compliance and identify helpful components of the intervention.  
51  
52  
53  
54 133

## 55 134 **METHODS**

### 56 135 **Subjects and Design**

1  
2 136  
3  
4 137 Many sedentary interventions to date have been limited by short durations. Therefore, we  
5  
6 138 conducted a 12 week randomized controlled trial design comparing a treatment group to a no  
7  
8  
9 139 treatment wait-list control group. We recruited apparently healthy but [physically inactive sedentary](#)  
10  
11 140 (self-reporting less than 60 minutes of moderate-to-vigorous intensity physical activity per week),  
12  
13 141 overweight (body mass index (BMI)  $\geq 25.0$  kg/m<sup>2</sup>) adults working in full-time (reporting minimum of  
14  
15 142 35.0+ hours/week) sedentary/desk-dependent occupations (reporting minimum of 75% of working  
16  
17 143 time spent sitting). Participants were required to gain permission from their supervisor prior to  
18  
19 144 enrollment. Research staff members screened participants for eligibility by telephone. Exclusionary  
20  
21 145 criteria included: 1) limitations with or contraindications to ambulatory exercise; 2) acute illness or  
22  
23 146 injury; 3) cognitive impairment, psychosis, or other diagnosed psychological illness (with the exception  
24  
25  
26 147 of depression and anxiety); 4) currently using psychotropic drugs; or 5) diagnosis of a chronic  
27  
28 148 condition such as heart failure or cancer. Participants were not compensated for participation in the  
29  
30 149 study. Experimental protocols were approved by the University and Medical Center Institutional  
31  
32 150 Review Board and voluntary written informed consent was obtained from each participant.

33  
34  
35 151 Participants of all races and ethnic backgrounds working at a large southern university were  
36  
37 152 passively recruited through email advertisements placed on an electronic mailing list serve that  
38  
39 153 served 5,392 employees. A total of 192 people responded to our advertisements of which 143 were  
40  
41 154 excluded from participation due to: not meeting eligibility criteria which primarily consisted of not  
42  
43 155 meeting BMI and/or physical activity requirements (N=120); declined to participate (N=19); or other  
44  
45 156 reasons (N=4). A 1:1 random allocation sequence was generated by the principal investigator using  
46  
47 157 an online random sequence generator.[21] Participants were assigned to one of two groups by a  
48  
49  
50 158 research staff member not involved in data collection based on the order in which they enrolled into  
51  
52 159 the study. A total of 49 participants deemed interested and eligible for participation were randomized  
53  
54 160 to one of two groups: 1) intervention (N=25); 2) wait-list control (N=24). Of the 49 enrolled, 40  
55  
56 161 participants completed all baseline and post-intervention assessments. Nine participants were lost to  
57  
58 162 follow-up (see Figure 1). Final analyses were completed on 40 participants with 23 intervention  
59  
60

1  
2 163 participants and 17 control participants (see Table 1). More than half of all participants were college  
3  
4 164 educated, reported an annual income greater than \$40,000 and reported being non-Hispanic/White.  
5  
6 165 Participants were enrolled and completed all testing sessions between June 2011 and June 2012.  
7

8  
9 166

10  
11 167 [Figure 1 here]  
12

13 168

## 14 15 169 **Group Descriptions**

16  
17 170

### 18 19 171 *Wait List Control Group*

20  
21 172 Participants randomized to the wait-list control group were asked to maintain their current  
22 173 behaviors for 12 weeks at which time they were given the option to receive the intervention treatment  
23  
24 174 materials.  
25  
26 174

27  
28 175

### 29 30 176 *Intervention Group*

31  
32 177 The primary intent of the intervention was to encourage participants to reduce their time spent  
33  
34 178 sedentary. The name used to promote the study on advertisements and study materials was  
35  
36 179 "*Pedal@Work: Reducing time spent sedentary...*". The intervention (Figure 2) comprised of three  
37  
38 180 primary components: 1) access to a portable pedal machine (MagneTrainer, 3D Innovations, Greeley,  
39  
40 181 CO) at their worksite; 2) access to a motivational website (Walker Tracker, Portland, OR) to receive  
41  
42 182 tips and reminders focused on reducing sedentary behaviors throughout the day; and 3) a pedometer  
43  
44 183 to use in conjunction with the website (Omron HJ-150). The pedal machine is a portable (18" height,  
45  
46 184 20" length) device that has been demonstrated as acceptable for use during sedentary office work  
47  
48 185 [10]. Because participants were sedentary employees working in professional environments, the  
49  
50 186 rationale for providing them pedal machines at work was to allow them to engage in light intensity  
51  
52 187 activity (i.e. active sitting) that they could perform for long periods throughout the day without causing  
53  
54 188 them to perspire. The pedal machine is accompanied by a PC interface and software package that  
55  
56 189 allows for objective monitoring of individual pedal activity. This software also provides the user with  
57  
58  
59  
60

1  
2 190 real-time feedback via a display monitor on pedal time, distance, speed and caloric expenditure. The  
3  
4 191 research team delivered the pedal machine to each participant's worksite, downloaded the pedal  
5  
6 192 tracking software to the participant's work computer, and worked with the participant to identify the  
7  
8 193 most feasible set up. Intervention participants were asked to keep the pedal machine connected to  
9  
10 194 their PC during all working hours. Intervention participants were required to gain clearance to use the  
11  
12 195 pedal machines and software at their work prior to participation. No additional interaction between the  
13  
14 196 research staff and participant's supervisors occurred during the course of the study. Participants were  
15  
16 197 located in 18 different buildings across campus. No participants worked within visible proximity of  
17  
18 198 each other.  
19

20  
21  
22 199 Intervention participants were also provided access to a motivational website that was  
23  
24 200 individually customized to the local culture of the worksite of which participants were recruited (Figure  
25  
26 201 2). Examples of customization included posting local images and messages specific to the local  
27  
28 202 institution. The content of the intervention focused primarily on reducing time spent sedentary (both  
29  
30 203 increasing active sitting via pedaling and taking breaks from sitting). Example messages included  
31  
32 204 "Let's try to pedal an extra five minutes during your lunch break today" and "Did you know standing up  
33  
34 205 burns more calories than sitting? Maybe it's time for a break!?" Most messages targeted time spent at  
35  
36 206 work although some messages broadly targeted sedentary time in general and could have impacted  
37  
38 207 sedentary time outside of work. Messages were theory based targeting constructs of the Social  
39  
40 208 Cognitive Theory[22] including self-monitoring, social support, self-efficacy, and perceived  
41  
42 209 environment. For example, participants were prompted via daily email messages to self-monitor their  
43  
44 210 daily pedal time and daily steps (via pedometer) on the website. The activity participants logged on  
45  
46 211 the website was used to fuel a virtual competition (aimed at building social support) in which small  
47  
48 212 groups of intervention participants (4-5 per group) collectively traveled across America. Participants  
49  
50 213 were also emailed three theory-based motivational messages each week targeting goal setting, self-  
51  
52 214 efficacy, and perceived environment. Specific goals were not set for intervention participants, rather  
53  
54 215 participants received advice on how to set goals and suggestions for daily pedaling time (e.g. "Try  
55  
56 216 fitting in 10 minutes of pedaling during your lunch today.") Finally, using a forum similar to Facebook,  
57  
58  
59  
60

1  
2 217 participants were able to post profile photos and status updates on a newsfeed and send messages  
3  
4 218 to members of their small groups further fostering social support.  
5

6 219  
7  
8  
9 220 [Figure 2 here]  
10

## 11 221 12 13 222 **Measures**

14  
15 223 All measures were collected at baseline and post-intervention (12 weeks) in a controlled  
16  
17 224 laboratory setting by two staff members blinded to participant's group assignment. The two staff  
18  
19 225 members were provided specific measurement duties to ensure each measure was collected by the  
20  
21 226 same staff member at both baseline and post-intervention. The primary outcome was daily sedentary  
22  
23 227 time as measured objectively by the StepWatch physical activity monitor (Orthocare Innovations,  
24  
25 228 Mountlake Terrace, Wash, USA). The StepWatch was specifically chosen for this study as it is worn  
26  
27 229 on the ankle making it ideally suited to measure both pedaling and walking behavior. Further, the  
28  
29 230 StepWatch has been demonstrated as a reliable measure of walking behavior (3 day agreements for  
30  
31 231 steps per day (39.1%) and percent inactive time ( 9.52%)) [23] and an accurate measure of both  
32  
33 232 sedentary behaviors (89.8-99.5% accurate) and light intensity walking (86.1% accurate)[24]. The  
34  
35 233 StepWatch has demonstrated superior ability for detecting pedaling time (23.5-54.4% accurate) when  
36  
37 234 compared to hip worn accelerometers (8.1-47.1% correct).[25] Participants were asked to wear the  
38  
39 235 monitor during all wakeful hours for seven consecutive days and keep track of wear time using an  
40  
41 236 activity log. Days in which participants wore the monitors for less than 10 hours were excluded from  
42  
43 237 final analysis. ~~Intervention participants wore the StepWatch monitor an average of 5.7 of 7.0 (81.0%)~~  
44  
45 238 ~~days for 14.5 hours/day while control participants wore the monitor an average of 5.5 days (78.6%) for~~  
46  
47 239 ~~13.8 hours/day.~~ The threshold for sedentary (0 steps/min) was based on the recommendation  
48  
49 240 provided by the product manufacturer. The thresholds for light (1–45 steps/min), moderate- (46-75  
50  
51 241 steps/min) and vigorous (76+ steps/min) intensity physical activities were based on previous work  
52  
53 242 which demonstrated moderate-intensity walking stride rate to range from 90–113 steps/minute  
54  
55 243 depending on height and stride length[26].  
56  
57  
58  
59  
60

1  
2 244 Blood pressure was measured with a stethoscope and sphygmomanometer using standard  
3  
4 245 techniques. Heart rate was monitored with a Polar™ heart rate monitor and chest strap. Body mass  
5  
6 246 was measured to the nearest 0.1 kg and height to the nearest 0.5 cm using a professional grade  
7  
8 247 digital medical scale and height rod (Seca 769, Hanover, MD). Waist circumference was measured in  
9  
10 248 duplicate with a standard Gulick measuring tape according to standard procedures.[27] Fasting blood  
11  
12 249 lipids (total cholesterol, LDL cholesterol, HDL cholesterol, and triglycerides) were assessed via finger  
13  
14 250 stick and using a point-of-care analyzer (Cholestech LDX analyzer) that has previously been  
15  
16 251 demonstrated as an accurate and precise measure of total cholesterol (1.6% and 3.0% respectively),  
17  
18 252 HDL-cholesterol (-2.74% and 1.05% respectively) and triglycerides (2.11% and 2.65%  
19  
20 253 respectively).[28] Estimated aerobic fitness was assessed via a single-stage submaximal treadmill  
21  
22 254 walking test which had been previously demonstrated as a valid estimate of total aerobic fitness  
23  
24 255 amongst middle-aged adults.[29]

25  
26 256 Compliance with the pedal machine (i.e., minutes pedaled/day, total days pedaled) was  
27  
28 257 assessed objectively via the activity tracking software. Pedal compliance data was downloaded  
29  
30 258 directly from each individual's work computer at the end of 12 weeks. Website use compliance (e.g.,  
31  
32 259 number of website logins, number of steps logged on the website) was assessed objectively at the  
33  
34 260 end of 12 weeks via a backend tracking database made available by the website administrators. In  
35  
36 261 order to assess which components of the intervention participants 'perceived' as helpful for reducing  
37  
38 262 their sedentary time, a process evaluation survey was conducted at 12 weeks amongst intervention  
39  
40 263 completers. Participants rated each intervention component using a five point Likert scale.  
41  
42  
43  
44  
45  
46

## 47 265 **Design/Statistical Analysis**

48  
49 266 A sample size of 40 (recruiting 49 assuming 20% attrition) was necessary to detect, with 80%  
50  
51 267 power, at  $\alpha=0.05$ , a 30 minute/day difference in daily sedentary time. The 30 minute/day difference  
52  
53 268 was identified as a reasonable estimate based on our previous study in which participants used the  
54  
55 269 same pedal machines an average of 23 minutes/day without any motivational intervention.[10] Means  
56  
57 270 (SD) were used to describe data where appropriate. This study was not powered to detect differences  
58  
59  
60

in the measured cardiometabolic risk factors. These measures were collected as secondary outcomes and to inform future trials.

The paired samples t-test was used to determine any within group differences at baseline and post-intervention. Analysis of covariance (ANCOVA) was used to test for differences between groups at post-intervention. Baseline values of interest were included as covariates in the model for all continuous variables consistent with recommended statistical procedures [30]. The underlying assumption no between group differences at baseline was confirmed for all measures by one way ANOVA. Finally, the 95% confidence interval (CI) for the mean differences of all primary and secondary outcomes of interest is presented.

## RESULTS

Baseline characteristics of both groups are presented in Table 1. Overall, participants were middle-aged and mostly classified as obese. More than half of all participants were college educated, reported an annual income greater than \$40,000 and reported being non-Hispanic/White. Differential drop out was observed over the course of the study, although sensitivity analyses indicate no differences between those that dropped and those that completed the study for measures of age (P=0.48), BMI (P=0.63), or daily sedentary time (P=0.32).

**Table 1.** Baseline characteristics by group Mean  $\pm$  S.D. (N=40)

|                              | Control Group<br>N=17 | Intervention Group<br>N=23 | All<br>(N=40) |
|------------------------------|-----------------------|----------------------------|---------------|
| <b>Age (years)</b>           | 47.6(9.9)             | 42.6(8.9)                  | 44.7(9.6)     |
| <b>Female %</b>              | 94.1%                 | 86.9%                      | 90%           |
| <b>Height (in)</b>           | 65.2(3.2)             | 65.4(3.4)                  | 65.4(3.4)     |
| <b>Weight (lbs)</b>          | 201.3(30.2)           | 194.1(34.9)                | 197.2(32.8)   |
| <b>Body Mass Index (BMI)</b> | 33.2(4.5)             | 31.7(4.9)                  | 32.4(4.8)     |

|                                |              |              |              |
|--------------------------------|--------------|--------------|--------------|
| <b>Non-Hispanic White (%)</b>  | 76.5%        | 63.6%        | 70.0%        |
| <b>College Graduate (%)</b>    | 71.0%        | 86.0%        | 78.5%        |
| <b>Income &gt;\$40,000 (%)</b> | 62.5%        | 63.6%        | 63.0%        |
| <b><u>Job Category (%)</u></b> |              |              |              |
| <u>Professional/Executive</u>  | <u>35.0%</u> | <u>52.0%</u> | <u>45.0%</u> |
| <u>Administrative</u>          | <u>65.0%</u> | <u>48.0%</u> | <u>55.0%</u> |

Table 2 illustrates monitor wear time for both group at each time point and changes in the primary outcomes of sedentary and physical activity behaviors for both groups. No between group differences or within group differences were observed for monitor wear time at either baseline or post-intervention. -No differences were observed for any sedentary or physical activity measures at baseline. A significant intervention effect favoring the intervention group (95% CI, -0.99, 118.4 minutes/day) was observed for absolute number of daily sedentary minutes after adjusting for baseline sedentary time and monitor wear time. Intervention effects reached near significance for both percent daily time spent sedentary (95% CI, -6.8%, -0.6%) and percent time spent in moderate intensity physical activity (95% CI, 0.0, 2.6%) (see Table 2).

**Table 2.** Absolute and relative time spent in sedentary and physical activity behaviors at baseline and post-intervention for Control (N=17) and Intervention (N=23) participants. Data presented as Mean(SD).

|                                           | Baseline            | Post-Intervention  | Mean Difference <sup>a</sup><br>(95% CI) | Within Group<br>P value | Between Group P value<br>(Post) |
|-------------------------------------------|---------------------|--------------------|------------------------------------------|-------------------------|---------------------------------|
| <b><u>Monitor Wear Time (Min/day)</u></b> |                     |                    |                                          |                         |                                 |
| <u>Control</u>                            | <u>829.6(93.5)</u>  | <u>869.5(94.1)</u> |                                          | <u>0.10</u>             | <u>0.15</u>                     |
| <u>Intervention</u>                       | <u>867.1(142.8)</u> | <u>827.2(71.9)</u> |                                          | <u>0.42</u>             |                                 |
| <b><u>Minutes Sedentary (Min/day)</u></b> |                     |                    |                                          |                         |                                 |
| Control                                   | 544.2(76.9)         | 599.7(106.6)       | +55.5 (2.8, 108.1)                       | 0.04*                   | <0.01**                         |
| Intervention                              | 584.9(136.1)        | 526.1(77.3)        | -58.7 (-118.4, 0.99)                     | 0.04*                   |                                 |
| <b><u>% Time Sedentary</u></b>            |                     |                    |                                          |                         |                                 |
| Control                                   | 65.7(7.5)           | 67.5(8.0)          | -1.8% (-2.7%, 6.3%)                      | 0.41                    | 0.06                            |
| Intervention                              | 67.6(7.2)           | 63.9(7.9)          | -3.7% (-6.8%, -0.6%)                     | 0.02*                   |                                 |



|                                   |             |             |                     |       |      |
|-----------------------------------|-------------|-------------|---------------------|-------|------|
| <b>Minutes Light (Min/day)</b>    |             |             |                     |       | 0.64 |
| Control                           | 265.7(84.0) | 262.2(70.8) | - 3.5 (-45.6, 38.6) | 0.86  |      |
| Intervention                      | 263.9(69.5) | 270.3(69.5) | +6.4 (-18.7, 31.5)  | 0.6   |      |
| <b>% Time Light</b>               |             |             |                     |       | 0.16 |
| Control                           | 31.9(8.1)   | 30.3(8.4)   | -1.6% (-6.0%, 2.8%) | 0.46  |      |
| Intervention                      | 30.6(8.2)   | 32.7(7.6)   | 2.1% (-0.8%, 4.9%)  | 0.15  |      |
| <b>Minutes Moderate (Min/day)</b> |             |             |                     |       | 0.13 |
| Control                           | 18.6(25.2)  | 17.4(23.7)  | -1.2 (-4.9, 2.4)    | 0.5   |      |
| Intervention                      | 14.5(18.5)  | 23.3(28.0)  | +8.8 (-1.6, 19.2)   | 0.09  |      |
| <b>% Time Moderate</b>            |             |             |                     |       | 0.06 |
| Control                           | 2.3(3.2)    | 2.0(2.9)    | -0.3% (-0.7%, 0.2%) | 0.21  |      |
| Intervention                      | 1.5(1.5)    | 2.8(3.4)    | +1.3% (0.0%, 2.6%)  | 0.04* |      |
| <b>Minutes Vigorous (Min/day)</b> |             |             |                     |       | 0.33 |
| Control                           | 1.2(2.6)    | 1.5(2.7)    | +0.4 (-0.2, 0.9)    | 0.19  |      |
| Intervention                      | 2.7(6.4)    | 4.9(10.9)   | +2.2 (-2.7, 7.0)    | 0.37  |      |
| <b>% Time Vigorous</b>            |             |             |                     |       | 0.25 |
| Control                           | 0.1(0.3)    | 0.2(0.3)    | 0.0% (0.0%, 0.1%)   | 0.32  |      |
| Intervention                      | 0.3(0.6)    | 0.6(1.3)    | +0.3% (-0.3, 0.9%)  | 0.26  |      |

<sup>a</sup> Mean change from baseline (95% confidence interval), adjusted for baseline value (ANCOVA)

\* p < 0.05 for within group change from baseline (paired t-test)

\*\* p<0.05 for between group differences at post-intervention (ANCOVA)

Table 3 illustrates changes in the secondary outcomes of cardiometabolic risk factors for both groups. A significant intervention effect was observed for waist circumference p=0.03 after adjusting for baseline values (Table 3). No significant intervention effects were observed for any other cardiometabolic risk factors.

**Table 3.** Cardiometabolic risk factors at baseline and post-intervention for Control (N=17) and Intervention (N=23) participants. Data presented as Mean(SD).

|                               | Baseline    | Post-Intervention | Mean Difference <sup>a</sup><br>(95% CI) | Within Group<br>P value | Between<br>Group P value<br>(Post) |
|-------------------------------|-------------|-------------------|------------------------------------------|-------------------------|------------------------------------|
| <b>Weight (lbs)</b>           |             |                   |                                          |                         | 0.58                               |
| Control                       | 201.4(30.2) | 202.4(30.5)       | +1.0 (-1.0, 3.0)                         | 0.31                    |                                    |
| Intervention                  | 194.2(34.9) | 194.4(34.5)       | +0.2 (-2.3, 2.7)                         | 0.86                    |                                    |
| <b>BMI (kg/m<sup>2</sup>)</b> |             |                   |                                          |                         | 0.76                               |
| Control                       | 33.2(4.5)   | 33.4(4.6)         | +0.2 (-0.1, 0.5)                         | 0.21                    |                                    |

|    |                                  |             |             |                    |       |        |
|----|----------------------------------|-------------|-------------|--------------------|-------|--------|
| 1  |                                  |             |             |                    |       |        |
| 2  | Intervention                     | 31.8(5.0)   | 31.9(5.0)   | -0.1 (-0.3, 0.5)   | 0.57  |        |
| 3  | <b>Systolic BP (mmHg)</b>        |             |             |                    |       | 0.70   |
| 4  | Control                          | 117.1(13.0) | 117.5(12.8) | -0.8 (-5.0, 3.6)   | 0.71  |        |
| 5  | Intervention                     | 120.0(13.8) | 115.7(10.8) | -4.3 (-8.0, -0.7)  | 0.02* |        |
| 6  | <b>Diastolic BP (mmHg)</b>       |             |             |                    |       | 0.51   |
| 7  | Control                          | 72.8(10.3)  | 73.2(10.6)  | -0.1 (-5.0, 4.8)   | 0.96  |        |
| 8  | Intervention                     | 78.2(10.3)  | 75.4(7.4)   | -2.8 (-6.2, 0.7)   | 0.11  |        |
| 9  | <b>Waist Circumference (cm)</b>  |             |             |                    |       | 0.03** |
| 10 | Control                          | 92.9(11.1)  | 93.9(10.8)  | +1.0 (-0.7, 2.7)   | 0.22  |        |
| 11 | Intervention                     | 92.6(11.2)  | 91.6(11.3)  | -1.0 (-2.1, 0.3)   | 0.06  |        |
| 12 | <b>Estimated V02 (ml/kg/min)</b> |             |             |                    |       | 0.10   |
| 13 | Control                          | 29.6(2.5)   | 30.0(2.6)   | +0.3 (-0.1, 0.8)   | 0.14  |        |
| 14 | Intervention                     | 30.8(5.1)   | 31.1(4.6)   | +0.3 (-0.6, 1.1)   | 0.53  |        |
| 15 | <b>Total Cholesterol (mg/dL)</b> |             |             |                    |       | 0.83   |
| 16 | Control                          | 184.4(25.9) | 185.0(18.9) | -0.8 (-15.1, 13.4) | 0.91  |        |
| 17 | Intervention                     | 191.4(26.3) | 189.7(27.0) | +0.7 (-5.9, 7.2)   | 0.83  |        |
| 18 | <b>HDL (mg/dL)</b>               |             |             |                    |       | 0.65   |
| 19 | Control                          | 47.6(18.4)  | 46.7(18.9)  | -0.9 (-6.8, 5.1)   | 0.76  |        |
| 20 | Intervention                     | 45.7(17.6)  | 43.7(16.4)  | -2.1 (-8.1, 3.4)   | 0.46  |        |
| 21 | <b>LDL (mg/dL)</b>               |             |             |                    |       | 0.96   |
| 22 | Control                          | 111.2(32.1) | 120.2(25.3) | +5.4 (-11.3, 22.1) | 0.50  |        |
| 23 | Intervention                     | 119.4(23.2) | 116.7(29.4) | -3.7 (-12.8, 5.4)  | 0.41  |        |
| 24 | <b>Triglycerides</b>             |             |             |                    |       | 0.91   |
| 25 | Control                          | 130.6(65.4) | 131.0(59.9) | +4.7 (-24.0, 33.3) | 0.73  |        |
| 26 | Intervention                     | 98.4(45.2)  | 118.4(57.3) | +18.3 (-0.1, 36.7) | 0.05  |        |

<sup>a</sup> Mean change from baseline (95% confidence interval), adjusted for baseline value (ANCOVA)

\* p < 0.05 for within group change from baseline (paired t-test)

\*\* p < 0.05 for between group differences at post-intervention (ANCOVA)

A total of 23 participants completed the intervention and provided compliance data (see Table 4). Intervention participants logged on to the website an average of 71.3% (59.8 days) of all days they had access to the website (including weekends) (Table 4). Intervention participants also logged an average of 7945 ± 4634 steps per day on the website over the 12 weeks. Participants pedaled an average of 37.7% (22.6 days) of all days they had access to the pedal machine (excluding weekends). Participants pedaled an average of 31.1 ± 31.6 minutes per day on the days they used the pedal machines and for an average of 16.1 ± 17.2 minutes per pedaling bout

**Table 4.** Intervention compliance measures amongst Intervention completers (N=23).

|                                                    | Mean/% | S.D. |
|----------------------------------------------------|--------|------|
| Web Compliance % (Days Logged in/Days with Access) | 71.3   | 35.7 |
| Average Steps Logged Per Day                       | 7945   | 4634 |
| Average Days Pedaled Over 12 Weeks                 | 22.6   | 17.6 |
| Pedal Compliance % (Days Pedaled/Days with Access) | 37.7   | 29.3 |
| Average Pedal Bouts/Day                            | 1.9    | 0.9  |
| Average Minutes Pedaled/Day Used                   | 31.1   | 31.6 |
| Average Minutes Pedaled/Pedal Bout                 | 16.1   | 17.2 |

When asked to rate the helpfulness of each intervention feature for reducing their sedentary time, participants rated the pedal machine biofeedback display, the pedometer, self-monitoring activity on the website as “extremely helpful” (median Likert score = 5.0; Table 5). Participants rated the email reminders to log daily activity and access to the pedal machine as “quite helpful” (median Likert score = 4.0; Table 5).

**Table 5:** Quartile and median Likert scale responses (1=Not at all helpful; 2=A little helpful; 3=moderately helpful; 4=Quite helpful; 5=Extremely helpful) on helpfulness of individual intervention components for reducing sedentary time (N=23).

| Please rate how helpful each of the following intervention components was in reducing your daily sedentary time. | Likert Scale |        |     |
|------------------------------------------------------------------------------------------------------------------|--------------|--------|-----|
|                                                                                                                  | Q1           | Median | Q3  |
| Pedal machine biofeedback display (minutes pedaled, calories burned, etc.)                                       | 4.0          | 5.0    | 5.0 |
| Wearing the pedometer                                                                                            | 4.0          | 5.0    | 5.0 |
| Self-monitoring daily steps and pedal time on the website                                                        | 4.0          | 5.0    | 5.0 |

|    |                                                                      |     |     |     |
|----|----------------------------------------------------------------------|-----|-----|-----|
| 1  |                                                                      |     |     |     |
| 2  | Email reminders to log physical activity on website                  | 4.0 | 4.0 | 5.0 |
| 3  |                                                                      |     |     |     |
| 4  | Access to pedal exercise machine at work                             | 4.0 | 4.0 | 5.0 |
| 5  |                                                                      |     |     |     |
| 6  | 'Walk Across America' Group Challenge on website                     | 3.0 | 3.0 | 5.0 |
| 7  |                                                                      |     |     |     |
| 8  | Social networking features on website (profile, newsfeed, messaging) | 3.0 | 3.0 | 4.0 |
| 9  |                                                                      |     |     |     |
| 10 | Environmental features (Walkscore, information on facilities)        | 3.0 | 3.0 | 3.8 |
| 11 |                                                                      |     |     |     |
| 12 |                                                                      |     |     |     |
| 13 | 334                                                                  |     |     |     |
| 14 |                                                                      |     |     |     |
| 15 | 335                                                                  |     |     |     |
| 16 |                                                                      |     |     |     |
| 17 | 336                                                                  |     |     |     |

## 18 336 DISCUSSION

19 337 The primary findings of this study suggest that this multicomponent intervention resulted in  
20 338 significant time spent sedentary in a small sample of inactive, overweight employees. The decreased  
21 339 sedentary time observed among the intervention group appears to have been at least partially  
22 340 replaced by an increase in moderate intensity activity. Our findings are important as the present study  
23 341 was among the first worksite interventions to promote 'active sitting' as a means of reducing  
24 342 sedentary time. Further, the present study was conducted over a longer duration (12 weeks)  
25 343 compared to similar trials [19 31] [which is necessary in order to determine whether the intervention](#)  
26 344 [instills habitual behavior change and/or whether such behavior change results in changes in](#)  
27 345 [cardiometabolic outcomes. While longer trials are necessary to confirm whether sedentary employees](#)  
28 346 [will adhere to such an intervention, process evaluation data suggests](#) participants [engaged with the](#)  
29 347 [intervention and maintained engagement through the 12 weeks. This study also](#) utilized an objective  
30 348 measure of sedentary/physical activity behavior whereas many previous interventions have relied  
31 349 upon self-report measures of sedentary time[17]. The present study builds upon past studies as our  
32 350 study was among the first to demonstrate significant reductions in objectively measured sedentary  
33 351 time when compared to a control group. This is important, as it has been suggested that decreasing  
34 352 sedentary time can result in improved health benefits independent of physical activity.[2 32-34]

35 353 Sedentary time amongst the intervention group was reduced by an average of 58 minutes/day  
36 354 or 3.7% of daily time. Our findings are within the range of similar studies. For example, Kozy-Keadle  
37 355 et al. found daily sedentary time reduced from 67.0% to 62.7% after a simple, seven day intervention  
38 356

1  
2 356 that included educational materials on sedentary health risks and tips to reduce sedentary time.[31]

3  
4 357 However, this study did not include a control group. In a study that did include a control group, Evans  
5  
6 358 et al. found no between group differences in objectively measured sitting time after five days of point-  
7  
8  
9 359 of-choice software reminders to stand up every 30 minutes while at work.[19]

10  
11 360 We also observed a significant intervention effect for waist circumference. This finding is  
12  
13 361 important as waist circumference has been shown to predict mortality amongst adults with coronary  
14  
15 362 artery disease.[35] Confidence in this finding is strengthened by past studies that have found waist  
16  
17 363 circumference to be sensitive to change in the absence of changes in other measures of adiposity[36]  
18  
19 364 as well as studies reporting interruptions from sedentary time to be associated with waist  
20  
21 365 circumference.[37] Furthermore, this finding is consistent with findings of a previous 16-week internet-  
22  
23 366 delivered physical activity program which demonstrated modest improvements in daily steps and  
24  
25 367 waist circumference.[36] The lack of changes in other cardiometabolic risk factors may be due to the  
26  
27 368 low intensity of the intervention as well as the limited duration of 12 weeks. Studies of longer duration  
28  
29 369 are needed to determine whether long-term reduction in sedentary time results in cardiometabolic risk  
30  
31 370 reduction.  
32  
33

34  
35 371 Participant compliance to the website overall was high with participants logging into the  
36  
37 372 website an average of 71% of all intervention days. This is important as past internet-delivered  
38  
39 373 intervention studies have identified engagement to be a challenge [38 39] and a predictor of  
40  
41 374 intervention success.[40] By comparison, Lewis et al. reported participants logged on to a physical  
42  
43 375 activity website a median number of 50 times (13.7%) over 12 months.[41] Reasons for such high  
44  
45 376 website compliance in the present study may be due to the tailoring of the website to include locally  
46  
47 377 relevant images and messages and/or the regular email messages.  
48  
49

50 378 Participant compliance with the pedal machines in the present 12 week trial (31 minutes/day)  
51  
52 379 was higher when compared to compliance in our previous four week trial (23 minutes/day).[10] These  
53  
54 380 findings suggest the added motivational intervention, which included suggestions for setting goals and  
55  
56 381 finding time to pedal each day, resulted in improved daily compliance that was sustained over a  
57  
58 382 longer duration. Despite the logistical limitation of the portable pedal machine when paired with  
59  
60

1  
2 383 standard height desks (i.e., many participants reported their knees hit the underside of their desk  
3  
4 384 while pedaling), participants used the pedal machine on a fairly regular basis. In order to maximize  
5  
6 385 compliance with such portable pedal machines in future studies, it is recommended these devices be  
7  
8 386 paired with height adjustable desks that allow for comfortable pedaling during computer work tasks.

9  
10  
11 387 Intervention participants reported features that provided feedback including the pedal machine  
12  
13 388 tracking software, pedometers and self-monitoring daily activity on the website (which was  
14  
15 389 immediately followed by a graph illustrating the individual's daily progress) as the most helpful  
16  
17 390 features for reducing their daily sedentary time. This information is important and could be used to  
18  
19 391 inform future interventions aimed at reducing sedentary behavior. This finding is consistent with past  
20  
21 392 studies which have found biofeedback as a useful tool to improve health behaviors.[42 43]

22  
23  
24 393 The main limitation of the study was the limited generalizability due to a small sample size that  
25  
26 394 comprised primarily of middle-aged females working at a single institution. We also experienced  
27  
28 395 differential drop out, although follow-up analyses indicate no differences between those that dropped  
29  
30 396 and those that completed for age, BMI, or daily sedentary time.

31  
32 397 The present study is among the first interventions conducted within the worksite aimed  
33  
34 398 specifically at reducing daily sedentary time to demonstrate between group differences in objectively  
35  
36 399 measured sedentary time. Compliance with the motivational website was high while compliance with  
37  
38 400 the pedal machine was moderate. These findings are promising considering the relatively low cost of  
39  
40 401 the intervention which cost a total of \$180 (pedal machine and software, pedometer, access to  
41  
42 402 website) per participant. While an intervention effect was observed for waist circumference, no  
43  
44 403 between group differences were observed for any other cardiometabolic risk factors. More sedentary  
45  
46 404 focused interventions are needed to examine whether reducing sedentary time can be sustained  
47  
48 405 long-term and whether long-term changes result in significant reductions in risk for chronic diseases.  
49  
50  
51

52 406  
53  
54 407  
55  
56 408 **Funding Source:** This study was funded by Oak Ridge Associated Universities grant #212112.  
57  
58 409  
59  
60

1  
2 410 **Competing Interests:** All authors have completed the ICMJE uniform disclosure form at  
3  
4 411 [www.icmje.org/coi\\_disclosure.pdf](http://www.icmje.org/coi_disclosure.pdf) and declare: no financial support from the funder Oak Ridge  
5  
6 412 Associated Universities for the submitted work, no financial relationships with any organizations that  
7  
8 413 might have an interest in the submitted work in the previous three years, and no other relationships or  
9  
10 414 activities that could appear to have influenced the submitted work.  
11  
12  
13

#### 14 415 **Contributorship Statement:**

- 17  
18 416 • Dr. Lucas Carr was responsible for the design of the study and led the manuscript preparation.
- 19  
20 417 • Dr. Kristina Karvinen assisted in the design of the study and assisted in the manuscript  
21  
22 418 preparation.
- 23  
24 419 • Ms. Mallory Peavler contributed to the manuscript preparation and was solely responsible for  
25  
26 420 leading the intervention which included duties of interacting with participants on a daily basis.
- 27  
28 421 • Ms. Rebecca Smith and Ms. Kayla Cangelosi both contributed to the manuscript preparation  
29  
30 422 and were responsible for collecting data at the baseline and post-intervention time points.  
31  
32  
33

#### 34 423 **Data Sharing**

- 35 424 • Extra data is available by emailing Dr. Lucas Carr at [lucas-carr@uiowa.edu](mailto:lucas-carr@uiowa.edu).  
36 425  
37 426  
38

#### 39 427 **Figure Legend**

40 428  
41  
42 429 **Figure 1.** Sequence of events and recruitment/enrollment schematic. Study was coordinated at East  
43  
44 430 Carolina University, Greenville, NC, from June 2011-June 2012.  
45  
46 431  
47  
48  
49

50 432 **Figure 2.** Images of intervention features: A. Portable pedal machine, B. Pedal machine activity  
51  
52 433 tracking software screenshot, C. Pedal machine monitor feedback; D. Pedometer; and E. Screenshot  
53  
54 434 of the website homepage.  
55  
56  
57 435  
58  
59  
60

## REFERENCES

1. Warren TY, Barry V, Hooker SP, et al. Sedentary behaviors increase risk of cardiovascular disease mortality in men. *Med Sci Sports Exercise* 2010;42(5):879-85.
2. Thorp AA, Healy GN, Owen N, et al. Deleterious associations of sitting time and television viewing time with cardiometabolic risk biomarkers: Australian Diabetes, Obesity and Lifestyle (AusDiab) study 2004-2005. *Diabetes Care* 2010;33(2):327-34.
3. Roberts CK, Vaziri ND, Sindhu RK, et al. A high-fat, refined-carbohydrate diet affects renal NO synthase protein expression and salt sensitivity. *J Appl Physiol* 2003;94(3):941-6 .
4. Beunza JJ, Martinez-Gonzalez MA, Ebrahim S, et al. Sedentary behaviors and the risk of incident hypertension: the SUN Cohort. *Am J Hypertens* 2007;20(11):1156-62.
5. Ford ES, Kohl HW, 3rd, Mokdad AH, et al. Sedentary behavior, physical activity, and the metabolic syndrome among U.S. adults. *Obesity Res* 2005;13(3):608-14.
6. Must A, Tybor DJ. Physical activity and sedentary behavior: a review of longitudinal studies of weight and adiposity in youth. *Int J Obes (Lond)* 2005;29 Suppl 2:S84-96.
7. Dunstan DW, Kingwell BA, Larsen R, et al. Breaking up prolonged sitting reduces postprandial glucose and insulin responses. *Diabetes Care* 2012;35(5):976-83.
8. Duvivier BM, Schaper NC, Bremers MA, et al. Minimal intensity physical activity (standing and walking) of longer duration improves insulin action and plasma lipids more than shorter periods of moderate to vigorous exercise (cycling) in sedentary subjects when energy expenditure is comparable. *PLoS One* 2013;8(2):e55542.
9. Thorp AA, Healy GN, Winkler E, et al. Prolonged sedentary time and physical activity in workplace and non-work contexts: a cross-sectional study of office, customer service and call centre employees. *Int J Behav Nutr Phys Act* 2012;9:128.
10. Carr LJ, Walaska KA, Marcus BH. Feasibility of a portable pedal exercise machine for reducing sedentary time in the workplace. *Br J Sports Med* 2012;46(6):430-5.
11. McCrady SK, Levine JA. Sedentariness at work: how much do we really sit? *Obesity (Silver Spring)* 2009;17(11):2103-5.
12. Brownson RC, Boehmer TK, Luke DA. Declining rates of physical activity in the United States: what are the contributors? *Annu Rev Public Health* 2005;26:421-43.
13. Church TS, Thomas DM, Tudor-Locke C, et al. Trends over 5 decades in U.S. occupation-related physical activity and their associations with obesity. *PLoS One* 2011;6(5):e19657.
14. Conn VS, Hafdahl AR, Cooper PS, et al. Meta-analysis of workplace physical activity interventions. *American journal of preventive medicine* 2009;37(4):330-9.
15. Dishman RK, Oldenburg B, O'Neal H, et al. Worksite physical activity interventions. *Amer J Prev Med* 1998;15(4):344-61.
16. Stokols D, Pelletier KR, Fielding JE. The ecology of work and health: research and policy directions for the promotion of employee health. *Health Educ Q* 1996;23(2):137-58.
17. Chau JY, der Ploeg HP, van Uffelen JG, et al. Are workplace interventions to reduce sitting effective? A systematic review. *Prev Med* 2010;51(5):352-6.
18. Healy GN, Eakin EG, Lamontagne AD, et al. Reducing sitting time in office workers: Short-term efficacy of a multicomponent intervention. *Prev Med* 2013;57(1):43-8.
19. Evans RE, Fawole HO, Sheriff SA, et al. Point-of-choice prompts to reduce sitting time at work: a randomized trial. *Amer J Prev Med* 2012;43(3):293-7.
20. Alkhajah TA, Reeves MM, Eakin EG, et al. Sit-stand workstations: a pilot intervention to reduce office sitting time. *Amer J Prev Med* 2012;43(3):298-303.
21. Random.org. Random Sequence Generator. Secondary Random Sequence Generator 2011. <http://www.random.org/sequences/>.



- 1  
2 485 22. Bandura, editor. Social Foundations of Thought and Action: A Social Cognitive Theory.  
3 486 Englewood Cliffs, NJ: Prentice-Hall, 1986.
- 4 487 23. Mudge S, Taylor D, Chang O, et al. Test-retest reliability of the StepWatch Activity Monitor outputs  
5 488 in healthy adults. *J Phys Act Health* 2010;7(5):671-6.
- 6 489 24. Foster RC, Lanningham-Foster LM, Manohar C, et al. Precision and accuracy of an ankle-worn  
7 490 accelerometer-based pedometer in step counting and energy expenditure. *Prev Med*  
8 491 2005;41(3-4):778-83.
- 9 492 25. Carr LJ, Mahar MT. Accuracy of intensity and inclinometer output of three activity monitors for  
10 493 identification of sedentary behavior and light-intensity activity. *J Obes*; 2012;1-9.
- 11 494 26. Rowe DA, Welk GJ, Heil DP, et al. Stride rate recommendations for moderate-intensity walking.  
12 495 *Med Sci Sports Exercise* 2011;43(2):312-8.
- 13 496 27. ACSM. ACSM's Guidelines for Exercise Testing and Prescription. In: ACSM, ed. Seventh ed:  
14 497 Lippincott Williams & Wilkins, 2006.
- 15 498 28. Issa JS, Strunz C, Giannini SD, et al. Precision and accuracy of blood lipid analyses by a portable  
16 499 device (Cholestech-LDX). *Arquivos brasileiros de cardiologia* 1996;66(6):339-42.
- 17 500 29. Ebbeling CB, Ward A, Puleo EM, et al. Development of a single-stage submaximal treadmill  
18 501 walking test. *Med Sci Sports Exercise* 1991 23;8:966-73.
- 19 502 30. Van Breukelen GJ. ANCOVA versus change from baseline: more power in randomized studies,  
20 503 more bias in nonrandomized studies [corrected]. *J Clin Epidemiol* 2006;59(9):920-5.
- 21 504 31. Kozey-Keadle S, Libertine A, Staudenmayer J, et al. The Feasibility of Reducing and Measuring  
22 505 Sedentary Time among Overweight, Non-Exercising Office Workers. *J Obes* 2012:1-10.
- 23 506 32. Owen N, Sparling PB, Healy GN, et al. Sedentary behavior: emerging evidence for a new health  
24 507 risk. *Mayo Clin Proc* 2010;85(12):1138-41.
- 25 508 33. Rhodes RE, Mark RS, Temmel CP. Adult sedentary behavior: a systematic review. *Am J Prev*  
26 509 *Med* 2012;42(3):e3-28.
- 27 510 34. Thorp AA, Owen N, Neuhaus M, et al. Sedentary behaviors and subsequent health outcomes in  
28 511 adults a systematic review of longitudinal studies, 1996-2011. *Am J Prev Med* 2011;41(2):207-  
29 512 15.
- 30 513 35. Coutinho T, Goel K, Correa de Sa D, et al. Combining body mass index with measures of central  
31 514 obesity in the assessment of mortality in subjects with coronary disease: role of "normal  
32 515 weight central obesity". *J Am Coll Cardiol* 2013;61(5):553-60.
- 33 516 36. Carr LJ, Bartee RT, Dorozynski C, et al. Internet-delivered behavior change program increases  
34 517 physical activity and improves cardiometabolic disease risk factors in sedentary adults: results  
35 518 of a randomized controlled trial. *Prev Med* 2008;46(5):431-8.
- 36 519 37. Healy GN, Dunstan DW, Salmon J, et al. Breaks in sedentary time: beneficial associations with  
37 520 metabolic risk. *Diabetes Care* 2008;31(4):661-6 ..
- 38 521 38. Spittaels H, De Bourdeaudhuij I, Vandelanotte C. Evaluation of a website-delivered computer-  
39 522 tailored intervention for increasing physical activity in the general population. *Prev Med*  
40 523 2007;44(3):209-17.
- 41 524 39. Vandelanotte C, Spathonis KM, Eakin EG, et al. Website-delivered physical activity interventions  
42 525 a review of the literature. *Am J Prev Med* 2007;33(1):54-64.
- 43 526 40. van den Berg MH, Runday HK, Peeters AJ, et al. Engagement and satisfaction with an Internet-  
44 527 based physical activity intervention in patients with rheumatoid arthritis. *Rheumatology*  
45 528 (*Oxford, England*) 2007;46(3):545-52.
- 46 529 41. Lewis B, Williams D, Dunsiger S, et al. User attitudes towards physical activity websites in a  
47 530 randomized controlled trial. *Prev Med* 2008;47(5):508-13.
- 48 531 42. Proper KI, van der Beek AJ, Hildebrandt VH, et al. Short term effect of feedback on fitness and  
49 532 health measurements on self reported appraisal of the stage of change. *Br J Sports Med*  
50 533 2003;37(6):529-34.
- 51 534 43. Bravata DM, Smith-Spangler C, Sundaram V, et al. Using pedometers to increase physical activity  
52 535 and improve health: a systematic review. *JAMA* 2007;298(19):2296-304.
- 53 536  
54 537  
55  
56  
57  
58  
59  
60
